# Supplementary material for: Rapid realist review of the role of community pharmacy in the public health response to COVID-19
Source: PubMed Central journal article supplement (PMC8210681; doi:10.1136/bmjopen-2021-050043), 2021-06-16

# BMJ Open

BMJ Open is committed to open peer review. As part of this commitment we make the peer review history of every article we publish publicly available.

When an article is published we post the peer reviewers' comments and the authors' responses online. We also post the versions of the paper that were used during peer review. These are the versions that the peer review comments apply to.

The versions of the paper that follow are the versions that were submitted during the peer review process. They are not the versions of record or the final published versions. They should not be cited or distributed as the published version of this manuscript.

BMJ Open is an open access journal and the full, final, typeset and author-corrected version of record of the manuscript is available on our site with no access controls, subscription charges or pay-per-view fees (<http://bmjopen.bmj.com>).

If you have any questions on BMJ Open's open peer review process please email [info.bmjopen@bmj.com](mailto:info.bmjopen@bmj.com)

# BMJ Open

## A Rapid Realist Review of the Role of Community Pharmacy in the Public Health Response to COVID-19

|                               |                                                                                                                                                                                                                                                                                                                                                                                                                                                                                         |
|-------------------------------|-----------------------------------------------------------------------------------------------------------------------------------------------------------------------------------------------------------------------------------------------------------------------------------------------------------------------------------------------------------------------------------------------------------------------------------------------------------------------------------------|
| Journal:                      | <i>BMJ Open</i>                                                                                                                                                                                                                                                                                                                                                                                                                                                                         |
| Manuscript ID                 | bmjopen-2021-050043                                                                                                                                                                                                                                                                                                                                                                                                                                                                     |
| Article Type:                 | Original research                                                                                                                                                                                                                                                                                                                                                                                                                                                                       |
| Date Submitted by the Author: | 09-Feb-2021                                                                                                                                                                                                                                                                                                                                                                                                                                                                             |
| Complete List of Authors:     | Maidment, Ian; Aston University<br>Young, Emma; The University of Sheffield<br>MacPhee, Maura; The University of British Columbia<br>Booth, Andrew; The University of Sheffield, School of Health & Related Research (SchARR)<br>Zaman, Hadar; University of Bradford<br>Breen, Juanita; University of Tasmania<br>Hilton, Andrea; University of Hull, FHSC<br>Kelly, Tony; Aston University, PPI Lead on Project<br>Wong, Geoffrey; University of Oxford, Primary Care Health Sciences |
| Keywords:                     | COVID-19, QUALITATIVE RESEARCH, Organisation of health services < HEALTH SERVICES ADMINISTRATION & MANAGEMENT                                                                                                                                                                                                                                                                                                                                                                           |
|                               |                                                                                                                                                                                                                                                                                                                                                                                                                                                                                         |

SCHOLARONE™  
Manuscripts

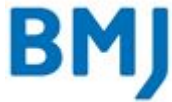

I, the Submitting Author has the right to grant and does grant on behalf of all authors of the Work (as defined in the below author licence), an exclusive licence and/or a non-exclusive licence for contributions from authors who are: i) UK Crown employees; ii) where BMJ has agreed a CC-BY licence shall apply, and/or iii) in accordance with the terms applicable for US Federal Government officers or employees acting as part of their official duties; on a worldwide, perpetual, irrevocable, royalty-free basis to BMJ Publishing Group Ltd ("BMJ") its licensees and where the relevant Journal is co-owned by BMJ to the co-owners of the Journal, to publish the Work in this journal and any other BMJ products and to exploit all rights, as set out in our [licence](#).

The Submitting Author accepts and understands that any supply made under these terms is made by BMJ to the Submitting Author unless you are acting as an employee on behalf of your employer or a postgraduate student of an affiliated institution which is paying any applicable article publishing charge ("APC") for Open Access articles. Where the Submitting Author wishes to make the Work available on an Open Access basis (and intends to pay the relevant APC), the terms of reuse of such Open Access shall be governed by a Creative Commons licence – details of these licences and which [Creative Commons](#) licence will apply to this Work are set out in our licence referred to above.

Other than as permitted in any relevant BMJ Author's Self Archiving Policies, I confirm this Work has not been accepted for publication elsewhere, is not being considered for publication elsewhere and does not duplicate material already published. I confirm all authors consent to publication of this Work and authorise the granting of this licence.

1  
2  
3  
4  
5 1 A Rapid Realist Review of the Role of Community Pharmacy in  
6  
7  
8  
9 2 the Public Health Response to COVID-19  
10  
11  
12

13 3 Ian Maidment (corresponding author), Aston University, Birmingham, B4 7ET, UK,  
14  
15 4 [i.maidment@aston.ac.uk](mailto:i.maidment@aston.ac.uk), Phone/fax: 0121-204-3000; Emma Young, University of Sheffield,  
16  
17 5 Sheffield, UK; Maura MacPhee, University of British Columbia, Vancouver, Canada; Andrew Booth,  
18  
19 6 University of Sheffield, Sheffield, UK; Hadar Zaman, University of Bradford, Bradford, UK; Juanita  
20  
21 7 Breen, University of Tasmania, Hobart; Andrea Hilton, University of Hull, Hull, UK; Tony Kelly, PPI  
22  
23 8 Lead (Aston University), Birmingham, UK; Geoff Wong, University of Oxford, Oxford, UK.  
24  
25  
26  
27 9  
28  
29  
30 10 Keywords: COVID-19, SARS-CoV-2, Community Pharmacy Services, Vaccination  
31  
32  
33 12 Word count: 3,521  
34  
35  
36 13  
37  
38 14  
39  
40  
41 15  
42  
43  
44 16  
45  
46  
47 17  
48  
49  
50  
51  
52  
53  
54  
55  
56  
57  
58  
59  
60

1  
2  
3 18 Introduction  
4  
5

6 19 Community pharmacists and their teams have remained accessible to the public providing essential  
7  
8 20 services despite immense pressures during the COVID-19 pandemic. They have successfully  
9  
10 21 expanded the influenza vaccination programme and are now supporting the delivery of the COVID-  
11  
12 22 19 vaccination roll-out.  
13  
14

15 23 Aim  
16  
17

18 24 This rapid realist review aims to understand how community pharmacy can most effectively deliver  
19  
20 25 essential and advanced services, with a focus on vaccination, during the pandemic and in the future.  
21  
22

23 26 Method  
24  
25

26 27 An embryonic programme theory was generated using four diverse and complementary documents  
27  
28 28 along with the expertise of the project team. Academic databases, preprint services and grey  
29  
30 29 literature were searched and screened for documents meeting our inclusion criteria. The data was  
31  
32 30 extracted from 103 documents to develop and refine a programme theory using a realist logic of  
33  
34 31 analysis. Our analysis generated 13 context-mechanism-outcome configurations explaining when,  
35  
36 32 why and how community pharmacy can support public health vaccination campaigns, maintain  
37  
38 33 essential services during pandemics, and capitalise on opportunities for expanded, sustainable public  
39  
40 34 health service roles. The views of stakeholders including pharmacy users, pharmacists, pharmacy  
41  
42 35 teams and other healthcare professionals were sought throughout to refine the 13 explanatory  
43  
44 36 configurations.  
45  
46  
47  
48

49 37 Results  
50  
51

52 38 The 13 context-mechanism-outcome configurations are organised according to decision makers,  
53  
54 39 community pharmacy teams and community pharmacy users as key actors. Review findings include:  
55  
56 40 supporting a clear role for community pharmacies in public health; clarifying pharmacists' legal and  
57  
58 41 professional liabilities; involving pharmacy teams in service specification design; providing suitable  
59  
60

1  
2  
3 42 guidance, adequate compensation and resources; and leveraging accessible, convenient locations of  
4  
5 43 community pharmacy.  
6  
7

#### 8 44 Discussion

9  
10  
11 45 Community pharmacy has been able to offer key services during the pandemic. Decision makers  
12  
13 46 must endorse, articulate and support a clear public health role for community pharmacy. We  
14  
15 47 provide key recommendations for decision makers to optimise such a role during these  
16  
17 48 unprecedented times and in the future.  
18  
19

20  
21 49

#### 22 23 50 Strengths and limitations of this study

24  
25  
26 51 A diverse group of professional and public stakeholders validated our findings from the literature.  
27  
28

29 52

30  
31 53 By using a realist approach, we were to use broad range of data, including grey literature.  
32  
33

34 54

35 55 To enable us to develop recommendations in a timely manner the focus of the review was  
36  
37 56 deliberately narrow.  
38  
39

40 57

41  
42 58 The topic could have been informed by other sources of evidence in particular empirical interviews  
43  
44 59 with key stakeholder.  
45  
46

47 60

48  
49 61 COVID-19 vaccination is a rapidly evolving area and this research was based on the best available  
50  
51 62 evidence at the time.  
52  
53

54 63

55  
56 64  
57  
58  
59  
60

1  
2  
3  
4  
5  
6  
7  
8  
9  
10  
11  
12  
13  
14  
15  
16  
17  
18  
19  
20  
21  
22  
23  
24  
25  
26  
27  
28  
29  
30  
31  
32  
33  
34  
35  
36  
37  
38  
39  
40  
41  
42  
43  
44  
45  
46  
47  
48  
49  
50  
51  
52  
53  
54  
55  
56  
57  
58  
59  
60

65

For peer review only

## 66 Introduction

67

68 Community pharmacy teams have continued to provide essential services during the coronavirus  
69 disease 2019 (COVID-19) pandemic. They offer accessibility and medicines expertise to the public,  
70 even in challenging times.<sup>1 2 3</sup> However, COVID-19 creates extra workload demands, such as  
71 medication dispensing with increases of up to 33% in prescription numbers.<sup>4</sup> To cope with this  
72 demand community pharmacies have increased their opening hours and hired additional staff.<sup>4</sup>  
73 Alongside this additional workload, they have managed widening coverage of the influenza vaccines  
74 programme.<sup>5</sup>

75 Evidence suggests that community pharmacy can successfully provide diverse vaccination services  
76 including seasonal and pandemic influenza, travel vaccinations and hepatitis B for at-risk groups,  
77 within the provisions of the UK National Health Service (NHS) or privately.<sup>6</sup> They have successfully  
78 provided influenza vaccines as an NHS commissioned advanced service since 2015.<sup>5</sup> One service  
79 evaluation found that of 485 patients asked, 99% expressed confidence in their pharmacist to  
80 provide additional vaccinations.<sup>7</sup> Community pharmacy can also support influenza and other  
81 vaccinations to combat the significantly higher COVID-19 related mortality in the non-white  
82 community.<sup>8 9</sup>

83 The COVID-19 pandemic has stretched NHS capacity to safely and efficiently meet public health  
84 demands. A role for community pharmacy in the national vaccination service requires an  
85 understanding of what pharmacy teams require to successfully deliver essential and advanced  
86 services during the pandemic. Such knowledge is timely, given the roll-out of COVID-19 vaccines  
87 across the community.<sup>10</sup>

88 Delivering a vaccine is a complex process and successful delivery is context-dependent. A realist  
89 review helps make sense of complex situations<sup>11 12</sup>, such as how community pharmacy can most



1  
2  
3 90 effectively address the challenges presented by COVID-19. A rapid review can generate guidance for  
4  
5 91 decision makers to assist with roll-out of COVID-19 vaccinations to community pharmacy.  
6  
7

## 8 9 92 **Methods**

10  
11  
12 93 A rapid realist review of academic and other literature, supplemented by input from key actors, was  
13  
14 94 undertaken to understand how and when community pharmacy can effectively support the public  
15  
16 95 health agenda during pandemics such as COVID-19. Rapid reviews aim to ensure findings are  
17  
18 96 generated and disseminated in response to the urgent nature of the situation. To produce this  
19  
20 97 knowledge at pace, we truncated the following review processes:

- 21  
22  
23  
24 98 - Programme theory development was undertaken within 1 month with input from the  
25  
26 99 project team.
- 27  
28 100 - Searching was expedited using broad search terms and using a limited number of key data  
29  
30 101 sources.
- 31  
32  
33 102 - Data analysis and context-mechanism-outcome configuration (CMOC) development  
34  
35 103 focussed on where the programme theory was considered most important during COVID-19.

36  
37  
38 104 This realist review was undertaken within six-months (August 2020 - January 2021), the protocol was  
39  
40 105 published on PROSPERO<sup>13</sup> and, where relevant, follows the RAMESES quality and publication  
41  
42 106 standards.<sup>14</sup>

### 43 44 45 107 **Stage 1: Programme Theory Development**

46  
47  
48 108 The project team met virtually to develop an embryonic programme theory using four diverse  
49  
50 109 documents from an initial search representing a professional journal<sup>15</sup>, a research journal<sup>16</sup>, a policy  
51  
52 110 document (Royal Pharmaceutical Society)<sup>17</sup> and a practical influenza briefing.<sup>18</sup> The team identified  
53  
54 111 the need for (i) enabling guidance for community pharmacy (to achieve legitimisation)<sup>16</sup>; (ii) practical  
55  
56 112 direction for community pharmacy practices (to ensure feasibility)<sup>15 16</sup>; and (iii) user assurance of  
57  
58 113 appropriate, safe, feasible and timely intervention (relative advantage).<sup>15</sup> The resultant embryonic  
59  
60

1  
2  
3 114 theory, patterned on a COM-B behavioural model of capability, opportunity, and motivation leading  
4  
5 115 to behaviour<sup>19</sup>, was used to inform searching and initial analyses.  
6  
7

## 8 9 116 Stage 2: Literature Searching

10  
11 117 Searches were conducted (July-August 2020) using MEDLINE, EMBASE, CINAHL, Web of Science, and  
12  
13 118 Scopus for search concepts relating to Pharmacy and COVID by AB (see Appendix 1 for search  
14  
15 119 strategy). Reference checking and citation searching of all included references on Google Scholar  
16  
17 120 (using the Publish or Perish tool) were also carried out. Given the novelty of the virus, we searched  
18  
19 121 the contents of preprint services and the World Health Organisation (WHO) COVID Register. Grey  
20  
21 122 literature searches included social media (e.g. blogs, facilitated Twitter® discussion [#Cpharmchat]),  
22  
23 123 community pharmacy websites, and emails from relevant regulators and professional organisations  
24  
25 124 (e.g., Royal Pharmaceutical Society [RPS], Pharmaceutical Services Negotiation Committee [PSNC],  
26  
27 125 General Pharmaceutical Council [GPhC]).  
28  
29  
30  
31  
32 126 Key inclusion criteria were high or middle-income countries, community pharmacy and infectious  
33  
34 127 disease management (see Appendix 2). The search covered January 2003-July 2020 to include SARS,  
35  
36 128 a comparable condition first identified in 2003. There were no restrictions on study designs eligible  
37  
38 129 for inclusion.  
39  
40  
41

## 42 43 130 Stage 3: Data Selection and Extraction (selection and coding)

44  
45  
46 131 Selection and appraisal of documents followed a two-step procedure:

- 47  
48 132 1). EY screened the title, abstract and keywords of potentially relevant documents against inclusion  
49  
50 133 criteria. A 10% random sample was checked by two research team members (AB and MM) for  
51  
52 134 consistency.  
53  
54  
55  
56 135 2). EY obtained and screened full texts of all documents meeting the eligibility criteria.  
57  
58  
59  
60

1  
2  
3 136 Relevant data from the included full text documents was coded into NVivo by EY, MM and JB. Some  
4  
5 137 codes came from the data (i.e. inductive coding); others were derived from the programme theory  
6  
7 138 (i.e. deductive coding) and some were derived using retroduction (i.e. by interpretation of what  
8  
9 139 might be functioning as mechanisms).<sup>20</sup> No assessment was made of the rigour of the data within  
10  
11 140 included documents, however global judgements were made of the quality of the explanations  
12  
13 141 provided by the CMOCs and programme theory using the criteria of consilience, simplicity and  
14  
15 142 analogy.<sup>21</sup>

#### 19 143 Stage 4: Data Synthesis

20 144 The data analysis/synthesis was conducted by EY, MM and JB with input from the rest of the project  
21  
22 145 team to develop and refine the programme theory using a realist logic of analysis. Our analysis  
23  
24 146 generated 13 realist CMOCs, explaining when, why and how community pharmacy can support  
25  
26 147 public health vaccination campaigns, maintain essential services during pandemics, and capitalise on  
27  
28 148 opportunities for expanded, sustainable public health service roles. Actor conversations generated  
29  
30 149 further CMOCs related to care for diverse and vulnerable populations, including the Black and  
31  
32 150 Minority Ethnic (BAME) community.

33  
34  
35  
36  
37  
38  
39 151 Our realist logic of analysis centred on the following questions:

- 40  
41  
42 152 • Interpretation of meaning: Do the contents coded by the team provide data that may be  
43  
44 153 interpreted as CMOCs?
- 45  
46 154 • Interpretations and judgements about CMOCs: How do the CMOCs relate to the programme  
47  
48 155 theory?
- 49  
50 156 • Interpretations and judgements about programme theory: How do the programme theory and  
51  
52 157 its CMOCs correspond with key actor perspectives of reality?
- 53  
54  
55  
56  
57  
58  
59  
60

1  
2  
3 158 Data to answer our questions was iteratively sought across documents. Interpretive cross-case  
4  
5 159 comparison was used to identify and to explain the “success” of pandemic community pharmacy  
6  
7 160 interventions delivered in different settings or to different population groups.  
8  
9

## 10 11 161 Key Stakeholders

12  
13  
14 162 Key stakeholders, including community pharmacists and support staff (including representatives  
15  
16 163 from large and smaller chains, sole independent pharmacies and primary care), other healthcare  
17  
18 164 professionals and members of the public were consulted on four occasions. The meetings took place  
19  
20 165 over Microsoft Teams and each lasted about one hour.  
21  
22

## 23 166 Patient and Public Involvement

24  
25  
26 167 Members of the public were drawn from The University of Sheffield’s Patient and Public Involvement  
27  
28 168 database and contacts of the core project team. Groups numbered between 11 and 13 members,  
29  
30 169 with ages ranging from 22 to 74 years, from diverse locations and ethnicities including Black African,  
31  
32 170 Black Caribbean, British Asian, British Chinese, White Irish and White British. Collectively,  
33  
34 171 stakeholders provided feedback and advice on their real-world experience of working in or using  
35  
36 172 community pharmacy.  
37  
38  
39

40 173

## 41 42 43 174 Results

44  
45  
46 175

47  
48 176 103 documents were included in this rapid review and were coded to develop and refine our CMOCs  
49  
50 177 and programme theory (PRISMA diagram in Appendix 3). The final programme theory is summarised  
51  
52 178 in Appendix 4—from abstract visioning to actual patient uptake of the COVID-19 vaccine. Although  
53  
54 179 the programme theory is outlined in a linear fashion, steps within it are not necessarily linear and  
55  
56 180 may occur simultaneously. The CMOCs are organized according to key actors, or individuals and  
57  
58 181 groups with a vested interest in community pharmacy delivery of a COVID-19 vaccination  
59  
60

182 programme. “Actor” derives from sociology and is synonymous with “stakeholder”; we privileged  
 183 this term to differentiate programme theory/CMOC organization from project stakeholder  
 184 participants.<sup>22</sup> Table 1 briefly describes the three actor groups with their respective CMOCs and  
 185 corresponding steps in Appendix 4. Tables 2-4 show the final 13 CMOCs.

186

187 Table 1: Programme Theory Actors with corresponding CMOCs and steps

| Programme Theory Actors               | Description                                                                                                                                                                                                                                                                                                                                                         | CMOCs*       | Steps in Programme Theory** |
|---------------------------------------|---------------------------------------------------------------------------------------------------------------------------------------------------------------------------------------------------------------------------------------------------------------------------------------------------------------------------------------------------------------------|--------------|-----------------------------|
| Decision Makers                       | The UK government, regulatory and professional bodies, the public.                                                                                                                                                                                                                                                                                                  | CMOC 1 - 4   | Steps 1 - 4                 |
| Community Pharmacists and their Teams | Community pharmacists are health care professionals registered by the General Pharmaceutical Council and supported by teams made up of counter assistants, dispensers and registered technicians. They work in high street locations, in local communities and in supermarkets. Employers range from large chains to small individually owned community pharmacies. | CMOC 5 – 9   | Steps 5 – 7 and 9 – 11      |
| Pharmacy Users                        | Members of the public who use any community pharmacy services including prescription dispensing, minor ailment advice/treatment or vaccination services.                                                                                                                                                                                                            | CMOC 10 - 13 | Step 8                      |

188

189 \*see Table 2-4

190 \*\*See Appendix 4

191

192 The following sections summarise the CMOCs related to each of the three actor groups. Illustrative  
 193 examples of the supporting evidence from review documents are presented (Tables 2-4).

194

### 195 *Decision makers*

196 Decision maker and public endorsement (CMOC 1) are essential first steps in enlisting community  
 197 pharmacy for COVID-19 vaccination programmes. Regulators must ensure pharmacists have the  
 198 legal scope to do so (CMOC 2), with community pharmacy input during the development of policies  
 199 and protocols (CMOC 3), so that final service specifications are flexible and do-able within local  
 200 settings (CMOC 4).

201 Table 2 - Decision Makers (CMOCs 1-4)

|                                                                                                                                |                                                                                                                                                                                                                                                                                                                                                                                                                                                                                                                                                                                                                                                                                                                                                                                                                                                                                                    |
|--------------------------------------------------------------------------------------------------------------------------------|----------------------------------------------------------------------------------------------------------------------------------------------------------------------------------------------------------------------------------------------------------------------------------------------------------------------------------------------------------------------------------------------------------------------------------------------------------------------------------------------------------------------------------------------------------------------------------------------------------------------------------------------------------------------------------------------------------------------------------------------------------------------------------------------------------------------------------------------------------------------------------------------------|
| <p><b>CMOC 1 –</b></p> <p><b>Support a public</b></p> <p><b>health role<sup>23 24 25</sup></b></p> <p><small>26-32</small></p> | <p><b>When the government, pharmacy regulators, professional bodies and the public endorse and support a clear role for community pharmacy in public health services (C), community pharmacists will be more likely to adopt vaccination services (O) because they see it as their professional role and duty (M).</b></p> <p><i>“Distribution and administration of the COVID-19 vaccination programme will require concerted action across the NHS. With unique insight and expertise in medicines and the delivery of vaccination programmes, pharmacists have a clear role in contributing to the success of this programme.” (Great Britain)<sup>24</sup></i></p> <p><i>“55% of the public have visited a pharmacy during the COVID19 crisis...89% of people believe pharmacies are playing an essential role in the COVID19 crisis.” (UK National Pharmacy Association)<sup>23</sup></i></p> |
|--------------------------------------------------------------------------------------------------------------------------------|----------------------------------------------------------------------------------------------------------------------------------------------------------------------------------------------------------------------------------------------------------------------------------------------------------------------------------------------------------------------------------------------------------------------------------------------------------------------------------------------------------------------------------------------------------------------------------------------------------------------------------------------------------------------------------------------------------------------------------------------------------------------------------------------------------------------------------------------------------------------------------------------------|

|                                                                                        |                                                                                                                                                                                                                                                                                                                                                                                                                                                                                                                                                                                                                                                                                                                                                                                                                                                                                                                                                           |
|----------------------------------------------------------------------------------------|-----------------------------------------------------------------------------------------------------------------------------------------------------------------------------------------------------------------------------------------------------------------------------------------------------------------------------------------------------------------------------------------------------------------------------------------------------------------------------------------------------------------------------------------------------------------------------------------------------------------------------------------------------------------------------------------------------------------------------------------------------------------------------------------------------------------------------------------------------------------------------------------------------------------------------------------------------------|
|                                                                                        | <p><i>“Pharmacists...have been called on to coordinate the administration of COVID-19 tests...providing ongoing COVID-19 surveillance to communities by allowing walk-in testing at community pharmacies...[This] might be more sustainable and convenient than the large-scale public screening being done as of the summer of 2020.” (USA)<sup>25</sup></i></p> <p><i>“Given the past success of community pharmacists with increasing annual seasonal influenza uptake and their accessibility, pharmacists will need to be central in administering COVID-19 vaccines in order to achieve rapid population-wide coverage.” (Canada)<sup>26</sup></i></p>                                                                                                                                                                                                                                                                                              |
| <p><b>CMOC 2 –Clarify legal and professional liabilities<sup>24 31 33-40</sup></b></p> | <p><b>When pharmacy regulators and the NHS clarify community pharmacists’ legal and professional liabilities arising from the administration of a novel and potentially unlicensed COVID-19 vaccine (C), community pharmacists are more willing to give the vaccination (O) because they feel reassured regarding liability (M).</b></p> <p><i>“The role of pharmacists in the COVID-19 vaccination programme must be made clear to the pharmacy profession itself. Professional and representative pharmacy bodies have an important role to play in providing the right level of information to the profession to support their roles in the vaccination programme.” (Great Britain)<sup>24</sup></i></p> <p><i>“Indemnity insurance for individual healthcare professionals needs to be amended to cover this activity and be state-funded. There also needs to be clear communication to healthcare professionals, so they clearly understand</i></p> |

|                                                                                                     |                                                                                                                                                                                                                                                                                                                                                                                                                                                                                                                                                                                                 |
|-----------------------------------------------------------------------------------------------------|-------------------------------------------------------------------------------------------------------------------------------------------------------------------------------------------------------------------------------------------------------------------------------------------------------------------------------------------------------------------------------------------------------------------------------------------------------------------------------------------------------------------------------------------------------------------------------------------------|
|                                                                                                     | <i>that they are covered and under which circumstances this applies.” (Great Britain)<sup>41</sup></i>                                                                                                                                                                                                                                                                                                                                                                                                                                                                                          |
| <b>CMOC 3 – Co-develop feasible service specifications<sup>1 38</sup></b><br><br><i>42-48</i>       | <b>When COVID-19 vaccination policy and service specifications have been developed with input from diverse community pharmacists and staff tasked with administering and supporting the administration of the vaccine (C), community pharmacies are more likely to deliver the service (O) because they believe the service specification is feasible (M).</b><br><br><i>“Pharmacists ideally want input into future policy changes before they are finalized, so that these can reflect capacity and preparedness on the ground and be publicized accurately.” (Great Britain)<sup>1</sup></i> |
| <b>CMOC 4 – Issue clear, relevant and timely guidance<sup>25 27 31 34</sup></b><br><br><i>48-62</i> | <b>When government, pharmacy regulators and professional bodies provide consistent, clear, relevant, and timely guidance for the delivery of the COVID-19 vaccines (C), community pharmacies are more likely to deliver the service (O), because the guidance is helpful and simplifies implementation (M).</b><br><br><i>“... it is good to see that NHSE/I have provided the information we have been waiting for to review the resources we have nationwide and decide how we can bring them to bear to help the NHS defeat this virus.” (Great Britain)<sup>49</sup></i>                    |

202

203

In England community pharmacies have government contracts and partnerships to deliver vaccinations and other essential services during emergencies, including the COVID-19 pandemic.<sup>25 31</sup>

205

<sup>32</sup> Pharmacies in the USA and Canada have also been identified as having a substantive role in

206

vaccine administration (CMOC1).<sup>25,26</sup> The idea of harnessing UK community pharmacy capacity

207

enjoys widespread public support (CMOC2).<sup>23</sup> However, appropriate service delivery is hampered by

208

unfeasible operational conditions (CMOC3)<sup>1</sup>; for example, medication deliveries are funded by the

209

UK government for “vulnerable people”, but this category of service users is defined narrowly by the



210 government and misunderstood by the public, creating unrealistic expectations of community  
 211 pharmacy and generating additional work.<sup>1</sup>

212 In contrast, when clear options for community pharmacy involvement in COVID-19 vaccination  
 213 programmes were issued through the NHS (CMOC4), the chief executive of the Association of  
 214 Independent Multiple Pharmacies commented positively on members' engagement in delivering  
 215 vaccines.<sup>49</sup>

### 216 *Community Pharmacists and Team*

217 Community pharmacies have had to manage ongoing essential services, in addition to supporting  
 218 COVID vaccination delivery during the pandemic (CMOC6), including delivery of necessary  
 219 medications (CMOC7). Given fears and anxieties related to COVID-19 and changes to service  
 220 delivery, community pharmacies have had to deal with inappropriate behaviours from the public,  
 221 including emotional abuse and threats of physical abuse (CMOC8). As an integral public health  
 222 service, community pharmacy capacity to meet NHS needs will be enhanced through use of IT and  
 223 collaboration with other service providers (CMOC9).

224 Table 3 - Community Pharmacists and Team (CMOCs 5-9)

|                                                                               |                                                                                                                                                                                                                                                                                                         |
|-------------------------------------------------------------------------------|---------------------------------------------------------------------------------------------------------------------------------------------------------------------------------------------------------------------------------------------------------------------------------------------------------|
| <b>CMOC 5 – Receive adequate compensation and resources<sup>1 63-77</sup></b> | <b>When community pharmacies receive adequate compensation and resource support for COVID-19 vaccines (C), they are more likely to deliver the service (O), because they feel recognised for their service contributions (M).</b>                                                                       |
|                                                                               | <i>“Pharmacists...have been incredible in supporting patients throughout COVID-19 and rightly deserve recognition for the work they do. We know that teams were already under pressure and that colleagues in community pharmacy are feeling added financial strain.” (Great Britain).<sup>63</sup></i> |

|                                                                                                                 |                                                                                                                                                                                                                                                                                                                                                                                                                                                                                                                                                                                                                                     |
|-----------------------------------------------------------------------------------------------------------------|-------------------------------------------------------------------------------------------------------------------------------------------------------------------------------------------------------------------------------------------------------------------------------------------------------------------------------------------------------------------------------------------------------------------------------------------------------------------------------------------------------------------------------------------------------------------------------------------------------------------------------------|
|                                                                                                                 | <p><i>“In the community, mitigating the impact of COVID-19 has...focused largely on general practitioners (GPs). This is unsurprising to those in the pharmacy profession who have long considered policy makers to overlook them.” (Great Britain)<sup>1</sup></i></p>                                                                                                                                                                                                                                                                                                                                                             |
| <p><b>CMOC 6 – Sustain capacity and facility to adapt essential services</b><sup>16 17 30 34 68 70 71</sup></p> | <p><b>When a community pharmacy has the capacity and permission to manage and adapt existing essential services during COVID-19 (C), they are more likely to effectively deliver and sustain these services (O) because it’s feasible for them to do so (M).</b></p>                                                                                                                                                                                                                                                                                                                                                                |
| <p>78-91 92</p>                                                                                                 | <p><i>“Virtual and telephone consultations have become commonplace, particularly to vulnerable patients. Pharmacists have implemented systems to dispense medications in advance of need to minimise wait times and duplicate visits. In case-by-case examples...there has been anticipatory management of medication-related needs.” (Ireland)<sup>92</sup></i></p> <p><i>“Pharmacists who had comfort and confidence in managing electronic communication reported feeling greater control over workflow and the ability to triage and queue patients more effectively based on priority and need.” (Canada)<sup>60</sup></i></p> |
| <p><b>CMOC 7 – Inform users of essential service availability/continuity</b></p>                                | <p><b>When community pharmacies have processes in place to inform pharmacy users about the availability of essential services (C), pharmacy users are less likely to become anxious (O), because they feel reassured about access to what they need (M).</b></p>                                                                                                                                                                                                                                                                                                                                                                    |

|                                                                                                    |                                                                                                                                                                                                                                                                                                                                                                                                                                                                                                                                                                                                                                                                                                                                                                                                                                                                                                                                                                                                                                                                                                                                                                                                                                                                                                                                        |
|----------------------------------------------------------------------------------------------------|----------------------------------------------------------------------------------------------------------------------------------------------------------------------------------------------------------------------------------------------------------------------------------------------------------------------------------------------------------------------------------------------------------------------------------------------------------------------------------------------------------------------------------------------------------------------------------------------------------------------------------------------------------------------------------------------------------------------------------------------------------------------------------------------------------------------------------------------------------------------------------------------------------------------------------------------------------------------------------------------------------------------------------------------------------------------------------------------------------------------------------------------------------------------------------------------------------------------------------------------------------------------------------------------------------------------------------------|
| <p>92 16 28 31 32 51 60 65 71 80 81</p> <p>85 93-101</p>                                           | <p><i>“Access to medications is a main concern expressed by our patients... The CDC and SAMHSA offer guidance on ways to reduce stress and anxiety in this time of uncertainty.”<sup>95</sup></i></p> <p><i>“As a result of the power dynamics at play, it is ultimately up to pharmacists to be able to reassure patients and provide care, all while taking into account their mental health. Currently, guidelines regarding patient interaction during a pandemic are needed”.<sup>51</sup></i></p> <p><i>“In addition, there is ongoing work in liaison with pharmacists, general practitioners, and state and territory authorities to enable therapeutic substitution by pharmacists in the event of a shortage. This will allow community pharmacists to substitute dose strength or form without prior approval from the prescriber, if a prescribed medicine is not available at the time of dispensing. These measures highlight the important role pharmacists can play in enabling and maintaining access to medicines for people in need throughout the COVID-19 outbreak.” (Australia)<sup>85</sup></i></p> <p><i>“Access to medications is a main concern expressed by our patients... The CDC and SAMHSA offer guidance on ways to reduce stress and anxiety in this time of uncertainty.” (USA)<sup>95</sup></i></p> |
| <p><b>CMOC 8 – Protect the health and safety of staff</b> <sup>24 31 51 71 77 81 102-108</sup></p> | <p><b>When community pharmacies have the means to protect the health of pharmacists and staff (C), they are more likely to deliver essential services and COVID-19 vaccination services (O), because they feel safe to do so (M).</b></p>                                                                                                                                                                                                                                                                                                                                                                                                                                                                                                                                                                                                                                                                                                                                                                                                                                                                                                                                                                                                                                                                                              |

1  
2  
3  
4  
5  
6  
7  
8  
9  
10  
11  
12  
13  
14  
15  
16  
17  
18  
19  
20  
21  
22  
23  
24  
25  
26  
27  
28  
29  
30  
31  
32  
33  
34  
35  
36  
37  
38  
39  
40  
41  
42  
43  
44  
45  
46  
47  
48  
49  
50  
51  
52  
53  
54  
55  
56  
57  
58  
59  
60

|                                                                                                                                         |                                                                                                                                                                                                                                                                                                                                                                                                                                                                                                                                                                                                                                                                                                                                                                                                                                                                                                                                                                                                                                                                                                                                         |
|-----------------------------------------------------------------------------------------------------------------------------------------|-----------------------------------------------------------------------------------------------------------------------------------------------------------------------------------------------------------------------------------------------------------------------------------------------------------------------------------------------------------------------------------------------------------------------------------------------------------------------------------------------------------------------------------------------------------------------------------------------------------------------------------------------------------------------------------------------------------------------------------------------------------------------------------------------------------------------------------------------------------------------------------------------------------------------------------------------------------------------------------------------------------------------------------------------------------------------------------------------------------------------------------------|
|                                                                                                                                         | <p><i>“...Given high levels of public anxiety and uncertainty regarding the integrity of the drug supply chain in Canada, many participants reported difficult, sometimes frightening, interactions with members of the public and their desire for dedicated security to provide support and conflict management” (Canada).<sup>31</sup></i></p> <p><i>“An additional burden Asian pharmacists face, on top of pharmacist harassment, is the rise of anti-Asian racism that has come about due to COVID-19. Verbal and even physical abuse has been reported to happen in various countries, such as the UK, France, and the USA, to those of Chinese descent...” (UK, France, USA)<sup>51</sup></i></p> <p><i>“The survey found that although more than a third (37%) of pharmacists said they felt unsafe at some point working during the pandemic, concerns over PPE have eased. This is due, in part, to the supply problems being eased and community pharmacists being finally allowed to order from the national online PPE portal in an emergency, after calls for access from the RPS.” (Great Britain)<sup>77</sup></i></p> |
| <p><b>CMOC 9 – Enhance collaboration across services, including IT<sup>18</sup></b><br/><br/><i>26 47 56 57 69 78 80 85 109-114</i></p> | <p><b>When systems needed for COVID-19 vaccination, including IT and remuneration, support collaboration by various service providers (e.g. general practitioner surgeries and community pharmacies: (C), a coordinated response is more likely (O), because reduced effort is needed from everyone (M).</b></p>                                                                                                                                                                                                                                                                                                                                                                                                                                                                                                                                                                                                                                                                                                                                                                                                                        |

1  
2  
3  
4  
5  
6  
7  
8  
9  
10  
11  
12  
13  
14  
15  
16  
17  
18  
19  
20  
21  
22  
23  
24  
25  
26  
27  
28  
29  
30  
31  
32  
33  
34

*“Planning and delivery should be undertaken across a consistent, pre-agreed footprint. It may be more efficient and cost effective to provide immunisation across a number of providers, pooling resources and sites to deliver the best service possible, and working in coordination with other local stakeholders such as directors of public health and local government.” (Great Britain)<sup>47</sup>*

35  
36  
37  
38  
39  
40  
41  
42  
43  
44  
45  
46  
47  
48  
49  
50  
51  
52  
53  
54  
55  
56  
57  
58  
59  
60

*“For many community pharmacists, a lack of connected IT is a huge problem. Kieran Eason, who runs an independent pharmacy in Tamworth, Staffordshire, says lack of intra-operability makes it more difficult to do relatively simple things, like sending prescription requests to GPs. “Pharmacy IT is just a complete disaster,” he says, suggesting the COVID-19 crisis has highlighted flaws, such as the number of different systems pharmacists use.” (Great Britain)<sup>69</sup>*

225

226 Although attention is focused on a COVID-19 vaccine, community pharmacies offer diverse essential  
227 services. In the UK and other high-income countries, community pharmacy services also provide  
228 advanced services such as vaccinations.<sup>115</sup> Pharmacists consider it a professional responsibility to  
229 provide essential services during the pandemic, despite clear financial risks to themselves.<sup>63</sup>

230 Despite pharmacists’ professional and moral obligations to provide essential services, ongoing  
231 persistent ‘under-recognition’ can jeopardize their ability to contribute to COVID-19 vaccinations  
232 (CMOC5) as well as maintain a usual service. Under-recognition has been an issue in previous UK  
233 vaccination campaigns; respondents to a survey of Welsh community pharmacists after the 2016  
234 influenza season described providing a “mop up” service for general practitioners (GPs).<sup>59 68</sup>

1  
2  
3 235 Multiple required community pharmacy service adaptations have been reported by the UK  
4  
5 236 Pharmaceutical Journal, including changeover in retail space to medication preparation and  
6  
7 237 dispensing, and call-in shopping services for other retail items (CMOC6). Service adaptations have  
8  
9 238 been affected by hours of operation, available staff, and cancellations of contracted services, such as  
10  
11 239 blood pressure testing and smoking cessation support—all with financial implications for  
12  
13 240 pharmacists.<sup>80</sup>

14  
15  
16  
17 241 Before COVID-19, community pharmacies globally were offering “valued-added services” (VAS) such  
18  
19 242 as drive-thru services, online ordering and communications services (e.g., prescription reminders) to  
20  
21 243 stay competitive. Many VAS services have helped pharmacies adapt more quickly to pandemic  
22  
23 244 restrictions.<sup>81</sup>

24  
25  
26  
27 245 During the pandemic, ensuring access to needed medications has been a critical pharmacy service,  
28  
29 246 to allay public concerns (CMOC7).<sup>16</sup> Potential and actual disruptions in expected services and needed  
30  
31 247 supplies (e.g., medications) have resulted in tensions, threats and verbal/physical abuse by the  
32  
33 248 public to community pharmacists (CMOC 8).<sup>51 80 116</sup> Safety policies, protocols and safety-related  
34  
35 249 supplies (e.g., PPEs) must in place to ensure community pharmacy teams’ safety.<sup>80</sup>

36  
37  
38  
39 250 The UK COVID-19 vaccination campaign borrows heavily from previous, successful collaborative  
40  
41 251 influenza vaccination programmes using community pharmacy and GPs (CMOC9).<sup>48</sup> Pooling  
42  
43 252 resources improves service delivery.<sup>117</sup> For example, the UK Pharmaceutical Journal reported how a  
44  
45 253 greater collaborative approach has resulted in successful influenza vaccination of home care staff  
46  
47 254 and domiciliary workers during the pandemic.<sup>117</sup>

48  
49  
50 255 The pandemic has clearly demonstrated the importance of interoperable, connected IT systems  
51  
52 256 across services.<sup>118</sup> Getting access to reliable information is important for tracking supplies and  
53  
54 257 deliveries related to the COVID-19 vaccination programme.<sup>69</sup> A pandemic silver lining is raised  
55  
56 258 awareness of IT functions for enhanced delivery of essential services (e.g., medication planning,  
57  
58  
59  
60

1  
2  
3 259 prescribing and dispensing between pharmacies and GPs) and advanced services, including  
4  
5 260 vaccinations.<sup>69</sup>  
6  
7

8  
9 261 *Pharmacy Users*

10  
11 262 Pharmacy users trust community pharmacies as a reliable source of information (CMOC10) about  
12  
13 263 vaccines, and pharmacies' local accessibility and convenience increases the likelihood of users  
14  
15 264 obtaining COVID-19 vaccines through them (CMOC11). Community pharmacy relationships with  
16  
17 265 vulnerable populations in their local settings may enhance uptake of the vaccine by these groups  
18  
19 266 (CMOC12). Provision for privacy is an important user consideration. Pharmacy users expect private  
20  
21 267 consultations to preserve their confidentiality (CMOC13).  
22  
23  
24  
25 268

269 Table 4 - Pharmacy Users (CMOCs 10-13)

270

|                                                                                                                                        |                                                                                                                                                                                                                                                                                                                                                                                                                                                                                                                                                                                                                                                                                                                                                                                                                              |
|----------------------------------------------------------------------------------------------------------------------------------------|------------------------------------------------------------------------------------------------------------------------------------------------------------------------------------------------------------------------------------------------------------------------------------------------------------------------------------------------------------------------------------------------------------------------------------------------------------------------------------------------------------------------------------------------------------------------------------------------------------------------------------------------------------------------------------------------------------------------------------------------------------------------------------------------------------------------------|
| <p><b>COMC 10 – Trust the pharmacist as reliable information source</b><sup>32 53 119-122</sup></p>                                    | <p><b>When pharmacy users receive information about the COVID-19 vaccine from their community pharmacy (C), they are more likely to get the vaccine (O), because they trust community pharmacy as a source of reliable, accurate information (M).</b></p> <p><i>“When patients were educated about influenza, herpes zoster, and pneumococcal vaccines as a result of a pharmacist-driven intervention in community pharmacies, they were influenced to receive the vaccination.” (USA)<sup>119</sup></i></p> <p><i>“Being able to address the public enquiries with accurate up-to-date information about the local situation and the overall infection progress is the key to build trustful relationship with them at troubled times.” (Macau)<sup>32</sup></i></p>                                                       |
| <p><b>CMOC 11 – Trust the pharmacist to deliver responsive services</b><sup>7 18 23 26 34 37 43 51 54 59 63 70 84 85 123-135</sup></p> | <p><b>When community pharmacies are trusted to make necessary service adaptations to ensure services are flexible, convenient and accessible (C), COVID-19 vaccine uptake is likely to be higher among pharmacy users (O) because the service is responsive to local needs (M).</b></p> <p><i>“Pharmacists have always been the most accessible health care provider; this is especially true in the era of COVID-19.... While other professionals have closed their doors to patients, community pharmacies remained open to the public despite stricter lockdown restrictions. As highly trusted healthcare clinicians, community pharmacists play a vital role in closing the gaps that are exacerbated by the additional strain on the system and reduced access to healthcare providers.” (Canada)<sup>51</sup></i></p> |



|                                                                                                                  |                                                                                                                                                                                                                                                                                                                                                                                                                                                                                                                                                                                                                                                                                                                                                                                                                                                                                                                                                                                                                                                                                                                                                                                                   |
|------------------------------------------------------------------------------------------------------------------|---------------------------------------------------------------------------------------------------------------------------------------------------------------------------------------------------------------------------------------------------------------------------------------------------------------------------------------------------------------------------------------------------------------------------------------------------------------------------------------------------------------------------------------------------------------------------------------------------------------------------------------------------------------------------------------------------------------------------------------------------------------------------------------------------------------------------------------------------------------------------------------------------------------------------------------------------------------------------------------------------------------------------------------------------------------------------------------------------------------------------------------------------------------------------------------------------|
|                                                                                                                  | <p><i>“Pharmacy flu vaccination services complement those provided by general practitioners to help improve overall coverage and vaccination rates for patients in at-risk groups. These services are highly accessed by patients from all socio demographic areas, and seem to be particularly attractive to carers, frontline healthcare workers, and those of working age.” (Great Britain)<sup>135</sup></i></p>                                                                                                                                                                                                                                                                                                                                                                                                                                                                                                                                                                                                                                                                                                                                                                              |
| <p><b>CMOC 12 –</b></p> <p><b>Access culturally-sensitive services</b></p> <p><small>27 78 80 92 136</small></p> | <p><b>When community pharmacies leverage their community location and community-staff relationships (C), vulnerable populations, such as Black, Asian and Minority Ethnic groups are more likely to use their services, including COVID-19 vaccination services (O), because they trust their local community pharmacies to provide culturally sensitive service. (M)</b></p> <p>“Research continues to highlight that patients who are medically underserved have poorer inequitable access to health care due to them experiencing greater physical barriers to accessibility, encountering poorer patient-professional communication and are significantly disadvantaged where a service is not tailored to their unique needs or preferences.” (Great Britain)<sup>137</sup></p> <p><i>“I think over the years what’s happened is nationally it’s almost like everything has to be the same, which then doesn’t work because it doesn’t accommodate all the little variations...So we need to go back and in each individual pharmacy, gear it towards the population that it is meant to be meeting the needs of” (Pharmacist caring for BAME community-Great Britain)<sup>137</sup></i></p> |

|                                                                                                                      |                                                                                                                                                                                                                                                                                                                                                                                                                                                                                                                                                                                                                                                                                                                                        |
|----------------------------------------------------------------------------------------------------------------------|----------------------------------------------------------------------------------------------------------------------------------------------------------------------------------------------------------------------------------------------------------------------------------------------------------------------------------------------------------------------------------------------------------------------------------------------------------------------------------------------------------------------------------------------------------------------------------------------------------------------------------------------------------------------------------------------------------------------------------------|
| <p><b>CMOC 13 –</b></p> <p><b>Receive private and confidential services<sup>7 50 65 129</sup></b></p> <p>138-140</p> | <p><b>When community pharmacies make provisions for privacy (C), pharmacy users are more likely to use their services (O), because they are reassured about confidentiality (M).</b></p> <p><i>“If there was something not right...the first thing I would do is make an appointment with a doctor. I wouldn’t do and talk to somebody over a pharmacy counter.” (Great Britain)<sup>65</sup></i></p> <p><i>“Privacy, confidentiality and dignity are all vital elements of a trusting relationship between healthcare professionals and their patients.... In terms of privacy, the quality was perceived by the participants to include a confidential room that enabled private consultations.” (Great Britain)<sup>7</sup></i></p> |
|----------------------------------------------------------------------------------------------------------------------|----------------------------------------------------------------------------------------------------------------------------------------------------------------------------------------------------------------------------------------------------------------------------------------------------------------------------------------------------------------------------------------------------------------------------------------------------------------------------------------------------------------------------------------------------------------------------------------------------------------------------------------------------------------------------------------------------------------------------------------|

271

272 Public trust in community pharmacists is high—similar to doctors and nurses.<sup>38</sup> Trust between  
 273 pharmacists and users can be leveraged to overcome scepticism about the COVID-19 vaccine.  
 274 Providing reliable information about the disease and the vaccine, as pharmacies have done with  
 275 other infections, can enhance public uptake of the COVID-19 vaccine.<sup>113</sup> In the USA, 90% of the US  
 276 population lives within 5 miles of a community pharmacy. Given their convenience and accessibility,  
 277 consumers have visited their community pharmacists 12 times more frequently than their GPs.<sup>21</sup> A  
 278 UK study found that consumers who were eligible for a free influenza vaccine through their GPs  
 279 were willing to pay for pharmacy service because of convenience and ease of access.<sup>127</sup> Established,  
 280 trusting relationships are especially important for providing culturally sensitive services to  
 281 marginalized and vulnerable communities.<sup>129</sup> Community pharmacists, often members of local  
 282 communities are specially positioned to understand the culturally contextual factors that impact  
 283 their pharmacy users.<sup>89</sup> Trusting relationships are founded on privacy, confidentiality and dignity,

1  
2  
3 284 and COVID-19, public health protocols and limited space must be considered—in order to maintain  
4  
5 285 vital trust among pharmacy users.<sup>65</sup>  
6  
7

## 8 286 Discussion

9  
10  
11  
12 287 This realist review sought to understand how community pharmacy can contribute to the public  
13  
14 288 health agenda during the COVID-19 pandemic, particularly continuation of essential services and  
15  
16 289 engagement in vaccination services.<sup>115</sup> As the COVID-19 vaccination service continues to evolve, our  
17  
18 290 recommendations for decision makers highlight opportunities for community pharmacy to promote  
19  
20  
21 291 safe, efficient and effective service delivery.  
22

23 292

## 26 293 Summary of key Findings

27  
28  
29 294 To optimise community pharmacy service during the pandemic, decision makers must endorse and  
30  
31 295 articulate a clear role for these healthcare professionals. The public already endorses advanced roles  
32  
33 296 for community pharmacy (e.g., vaccinations, minor ailment scheme), but public awareness depends  
34  
35  
36 297 on what decision makers do and say. Practical decision maker measures include adequate  
37  
38 298 reimbursement to help cover the cost for time, staff and PPE (particularly for a sustainable long-term  
39  
40 299 service); legal (including indemnity), regulatory coverage for advanced roles; and clear and  
41  
42 300 consistent guidance for vaccination preparation and for adaptation of essential services. When given  
43  
44 301 the opportunity, the permissions and resources to do so, community pharmacies have been able to  
45  
46 302 adapt quickly to continue essential services and whenever possible, to offer critical advanced  
47  
48  
49 303 services. Historically, community pharmacies have significantly increased vaccination uptake (e.g.,  
50  
51 304 influenza vaccinations) given their accessibility and convenience and capacity to adapt to local needs  
52  
53  
54 305 for the general population and marginalized groups (e.g., BAME).  
55

56 306  
57  
58  
59  
60

1  
2  
3  
4 307 Compare to other similar or related studies discussing important differences in  
5  
6  
7 308 results  
8  
9

10 309 At the time of this realist review, there were no similar reviews on community pharmacy roles with  
11  
12 310 respect to COVID-19 vaccinations. COVID-19 represents an unprecedented situation with limited  
13  
14 311 direct evidence to guide decision-making. However, realist approaches engage with a wider evidence  
15  
16 312 base, including research on past pandemics (e.g., SARS)<sup>60 141 142</sup>, mass vaccination campaigns (e.g.,  
17  
18 313 influenza)<sup>143</sup>, and community pharmacies' capacity pre-COVID-19 to deliver essential and advanced  
19  
20 314 services.<sup>19 144 145</sup> Key factors previously include a lack of leadership, a lack of guidance and an  
21  
22 315 increasing reliance on professional judgement and experience.<sup>60</sup> Research from the UK and other  
23  
24 316 economically developed countries supports the 13 CMOCs and decision maker recommendations in  
25  
26 317 this review (see tables 2-4 and table 5). However, limitations continue to surround the direct policy  
27  
28 318 relevance of much of the community pharmacy evidence base.<sup>146</sup>  
29  
30  
31  
32  
33  
34

35 320 Study strengths and limitations  
36  
37

38 321 The realist approach uses diverse data, including grey literature. This feature is especially important  
39  
40 322 given a novel and rapidly evolving topic area, such as COVID-19. Multiple researchers with subject  
41  
42 323 matter expertise participated in screening the literature and extracting and coding data, which  
43  
44 324 maximised opportunities to discuss and debate the plausibility of the inferences made. The CMOCs  
45  
46 325 were developed and refined through regular discussions within a team with varied academic and  
47  
48 326 clinical backgrounds. Professional and public stakeholder consultation further refined the CMOCs.  
49  
50  
51  
52 327 All rapid reviews operationalise coverage versus expediency. Other sources of evidence could have  
53  
54 328 informed the review; however, potential gaps were mitigated by stakeholder engagement and  
55  
56 329 expertise within the team. The evidence supporting the CMOCs was based on available time for  
57  
58 330 document review, and during the review period, research, directives and policy related to COVID-19  
59  
60

331 vaccination rapidly evolved. The programme theory and its CMOCs, however, are expressed in such  
 332 a way that they can be further confirmed, refuted or refined in the future using additional data.

### 333 **Meaning of the study: possible explanations and implications for decision makers**

334 Although there are multiple actors involved in pandemic response, for brevity, recommendations  
 335 (Table 5) are directed towards decision makers who possess the formal authority to implement the  
 336 recommendations.

337  
 338 Table 5 - Recommendations for Decision Makers to Increase Community Pharmacy Engagement in  
 339 Pandemic Response (for further details check: <https://www2.aston.ac.uk/lhs/research/periscope>).

| <b>Recommendations</b>                                                                                                                                      | <b>Derived from CMOC</b> |
|-------------------------------------------------------------------------------------------------------------------------------------------------------------|--------------------------|
| Articulate a clear public health agenda role for community pharmacy (e.g., COVID-19 testing and vaccination)                                                | 1                        |
| Ensure pharmacy regulations for advanced roles, such as novel vaccine administration, are in place to legally protect community pharmacists and their teams | 2                        |
| Involve local community pharmacies in policy and service specification development                                                                          | 3                        |
| Provide timely guidance with sufficient details for community pharmacies to quickly adapt to local needs                                                    | 4                        |
| Provide adequate funding and reimbursement for community pharmacy services to deliver COVID-19 vaccines                                                     | 5                        |
| Equip community pharmacies with the necessary permissions to manage and adapt essential services                                                            | 6                        |

|                                                                                                                                                      |   |
|------------------------------------------------------------------------------------------------------------------------------------------------------|---|
| Ensure community pharmacies have the means to adequately protect the health of themselves, their staff and pharmacy users                            | 8 |
| Facilitate collaboration and coordination of COVID-19 vaccination services across providers (e.g., GPs, community pharmacies) and systems (e.g., IT) | 9 |

340

341 As the CMOCs were refined, ‘tensions’ were uncovered with implications for decision makers,  
 342 particularly: community pharmacists as healthcare professionals versus retailers<sup>43 106 145 147</sup>;  
 343 community pharmacies’ capacity to remain financially viable while managing essential and advanced  
 344 services.<sup>19 148 149</sup> and; pharmacists’ capacity to provide off-site services while maintaining physical  
 345 premises.<sup>150</sup> These tensions stem from lack of awareness of community pharmacists as healthcare  
 346 professionals.

347

348 Along the continuum of healthcare from community to hospital, community pharmacy is often the  
 349 first point of contact for the public. Community pharmacies contribute to primary care services  
 350 through essential services (e.g., medication dispensing) and expanded roles (e.g., vaccinations),<sup>115 147</sup>  
 351 often decreasing workload pressures on other providers, such as GPs.<sup>151</sup> Public surveys demonstrate  
 352 high levels of satisfaction with community pharmacy services, and vaccination uptake is increased  
 353 when pharmacies deliver these services.<sup>149</sup> Nevertheless, lack of public and decision maker  
 354 awareness of community pharmacy primary care roles has slowed uptake and integration of these  
 355 services.<sup>121</sup> A recent UK public survey found that community pharmacies are seen as “a medicine  
 356 supply shop by 48.3% of people, as a place to purchase medicines by 22%, and a place to purchase  
 357 non-medicinal products by 17.7%.”<sup>28</sup>

358

359 In Ireland and Canada community pharmacies are an integral part of national vaccination  
 360 campaigns.<sup>149</sup> In both instances, community pharmacists participate in vaccination planning,  
 361 pharmacy regulators provide clear guidance on vaccination management, and vaccinations are

1  
2  
3 362 equitably refunded through public health systems. The removal of barriers, such as economic  
4  
5 363 pressures on pharmacies has resulted in impressive national vaccine uptake, even in large countries,  
6  
7 364 such as Canada.<sup>149</sup> Globally, there is an emerging trend for governments, health insurance companies  
8  
9  
10 365 and consumers to remunerate community pharmacies for services that contribute to improved  
11  
12 366 health outcomes.<sup>150</sup>

13  
14 367  
15  
16 368 Community pharmacies tend to be defined as premises where medications are dispensed, which  
17  
18 369 compounds the confusion (by the public and decision makers) of professional primary care services  
19  
20 370 versus retailers.<sup>150</sup> Instead, pharmacies should be defined with respect to actions or services that  
21  
22 371 require specialised health knowledge to optimise health outcomes. For example, a retail approach to  
23  
24 372 over-the-counter (OTC) medications is to permit consumers to make their own choices, similar to  
25  
26 373 supermarket choices. Pharmacy input for into OTC purchases could potential decrease adverse  
27  
28 374 medication interactions or unnecessary allergic reactions.<sup>147</sup> The 'value-add' of community  
29  
30 375 pharmacies, evidence-informed engagement with consumers, can decrease morbidity and mortality  
31  
32 376 outcomes and increase medication regimen adherence.<sup>150 152</sup>

33  
34  
35  
36  
37 377 Although community pharmacists can provide professional services off premises (e.g.,  
38  
39 378 immunizations in community and religious centres), they need to maintain their physical premises  
40  
41 379 and staff for financial reasons. In addition, pharmacy users seek out community pharmacy services  
42  
43 380 due to their accessibility and convenience, and without a physical space to engage regularly with  
44  
45 381 pharmacy users, trust-building between pharmacists and users is compromised.<sup>153</sup>

46  
47  
48  
49 382  
50  
51 383 As evidenced by public media, many countries, including the UK are declaring service specifications  
52  
53 384 for COVID-19 vaccinations. Community pharmacists can potentially provide vaccination services in  
54  
55 385 two locations.<sup>154</sup> They can collaborate with GPs in Primary Care Networks (PCN) to support PCN  
56  
57 386 vaccination sites. Alternatively, they can provide a COVID-19 vaccination service from their premises  
58  
59  
60

1  
2  
3 387 if they meet service specifications. The described tensions create difficult choices for pharmacists  
4  
5 388 that can be ameliorated through the decision maker recommendations in Table 5.  
6  
7  
8 389

## 10 390 Unanswered questions and future research

13 391 A future realist evaluation involving primary data collection from key actors will inform refinement  
14  
15 392 of the programme theory, CMOCs and decision maker recommendations. This empirical research  
16  
17 393 will address the tensions identified above. Future research will also address issues identified through  
18  
19 394 the stakeholder groups, such as vaccination hesitancy, outside the scope of this review. While this  
20  
21 395 work touched upon unique issues for marginalised populations including BAME groups, those of  
22  
23 396 lower socioeconomic status and those with disabilities, further exploration is needed.  
24  
25  
26  
27  
28 397

## 31 398 Conclusion

34 399 The COVID-19 pandemic is a worldwide health emergency. Vaccination is key to combatting the  
35  
36 400 pandemic. The role of community pharmacy may be both short and long term; with a potential need  
37  
38 401 for regular annual vaccines. This rapid realist review offers recommendations for decision makers to  
39  
40 402 enable community pharmacy to play a key role, both during these unprecedented times and into the  
41  
42 403 future.  
43  
44  
45  
46 404  
47  
48  
49 405  
50  
51  
52 406  
53  
54  
55  
56  
57  
58  
59  
60



## 407 Acknowledgement:

408 We acknowledge the contribution from professional and member of the public key stakeholder.

## 409 Funders

410 Jointly funded by UKRI and NIHR COV0176. The views expressed are those of the author(s) and not  
411 necessarily those of the NIHR, UKRI or the Department of Health and Social Care.

## 412 Contributorship statement

413 IM conceived and led the project and had overall responsibility for PERISCOPE. All team members  
414 developed develop the embryonic programme theory. AB conducted the searches. AB and GW  
415 advised on realist methods. GW also advised on primary care implications and provided  
416 methodological oversight. EY screened documents at title, abstract and full-text with support from  
417 AB and MM. EY, MM and JB coded relevant data into NVivo. EY, MM and JB conducted the data  
418 analysis/synthesis. HZ and AH advised on pharmacy aspects and policy implications. TK led PPI. TK  
419 and HZ advised on implications in BAME communities. All team members contributed drafting the  
420 final report for publication and approved the final draft for submission.

## 421 Data Sharing Statement

422 No additional data available.

## 423 Competing Interests

424 Geoff Wong is Deputy Chair of the NIHR HTA Prioritisation Committee: Integrated Community Health  
425 and Social Care (A) and Member of the NIHR HTA Prioritisation Committee: Integrated Community  
426 Health and Social Care (A) Methods Group.

427 Andrew Booth is a member of the National Institute for Health Research Health Services and  
428 Delivery Research Funding Board, the National Institute for Health Research Evidence Synthesis

1  
2  
3 429 Programme Advisory Group and the National Institute for Health Research School for Social Care  
4

5 430 Research Commissioning Panel.  
6  
7

8 431  
9  
10  
11  
12  
13  
14  
15  
16  
17  
18  
19  
20  
21  
22  
23  
24  
25  
26  
27  
28  
29  
30  
31  
32  
33  
34  
35  
36  
37  
38  
39  
40  
41  
42  
43  
44  
45  
46  
47  
48  
49  
50  
51  
52  
53  
54  
55  
56  
57  
58  
59  
60

For peer review only

432 **References**

- 433 1. Parkhurst C, Singh Purewal G, Donyai P. Community Pharmacy and COVID-19—The Unsung Heroes  
434 on Our High Streets. *Journal of Patient Experience* 2020;7(3):282-84. doi:  
435 10.1177/2374373520927638
- 436 2. Maidment I, Lawson S, Wong G, et al. Towards an understanding of the burdens of medication  
437 management affecting older people: the MEMORABLE realist synthesis. *BMC geriatrics*  
438 2020;20(1):183. doi: 10.1186/s12877-020-01568-x [published Online First: 2020/06/06]
- 439 3. Barry HE, Hughes CM. Managing medicines in the time of COVID-19: implications for community-  
440 dwelling people with dementia. *International Journal of Clinical Pharmacy* 2020 doi:  
441 10.1007/s11096-020-01116-y
- 442 4. Wickware C. Pharmacies' dispensing increases by up to a third as a result of COVID-19, survey  
443 finds. . *Pharm J* 2020:PJ April 2020 online. doi: 10.1211/pj.2020.20207917
- 444 5. Pharmaceutical Services Negotiating Committee. Flu Vaccination Service 2020 [Available from:  
445 <https://psnc.org.uk/services-commissioning/advanced-services/flu-vaccination-service/>  
446 accessed 12/11/20.
- 447 6. Pharmaceutical Services Negotiating Committee. Vaccination Services 2020 [Available from:  
448 [https://psnc.org.uk/services-commissioning/locally-commissioned-services/vaccination-](https://psnc.org.uk/services-commissioning/locally-commissioned-services/vaccination-services/08/12/2020)  
449 [services/08/12/2020](https://psnc.org.uk/services-commissioning/locally-commissioned-services/vaccination-services/08/12/2020).
- 450 7. Rendell T. Community pharmacist-led influenza vaccination: a service evaluation. *The*  
451 *Pharmaceutical Journal* 2020 doi: 10.1211/pj.2020.20208383
- 452 8. Public Health England. Beyond the data: Understanding the impact of COVID-19 on BAME groups.  
453 London: Public Health England, 2020.
- 454 9. Patel M. We must tear down the barriers to equality for BAME communities highlighted by COVID-  
455 19. *Pharmaceutical Journal* 2020

- 1  
2  
3 456 10. Robinson J. Ten things pharmacists should know about COVID-19 vaccines. *The Pharmaceutical*  
4  
5 457 *Journal* 2020 doi: 10.1211/pj.2020.20208429  
6  
7  
8 458 11. Wong G, Brennan N, Mattick K, et al. Interventions to improve antimicrobial prescribing of  
9  
10 459 doctors in training: the IMPACT (IMProving Antimicrobial presCribing of doctors in Training)  
11  
12 460 realist review. *BMJ Open* 2015;5(10):e009059. doi: 10.1136/bmjopen-2015-009059  
13  
14 461 12. Maidment ID, Lawson S, Wong G, et al. Health Services and Delivery Research. Medication  
15  
16 462 management in older people: the MEMORABLE realist synthesis. Southampton (UK): NIHR  
17  
18 463 Journals Library 2020.  
19  
20  
21 464 13. Maidment I, Young E, Wong G, et al. A rapid realist review of community pharmacy support for  
22  
23 465 the public health agenda during the COVID-19 pandemic and future health emergencies.  
24  
25 466 PROSPERO 2020 CRD42020194078, 2020.  
26  
27  
28 467 14. Wong G, Greenhalgh T, Westhorp G, et al. Development of methodological guidance, publication  
29  
30 468 standards and training materials for realist and meta-narrative reviews: the RAMESES  
31  
32 469 (Realist And Meta-narrative Evidence Syntheses – Evolving Standards) project. *Health*  
33  
34 470 *Services and Delivery Research* 2014;2(30):1-252. doi: 10.3310/hsdr02300  
35  
36  
37 471 15. Pharmacies across the UK close 'intermittently' to cope with increasing pressures from COVID-19.  
38  
39 472 *The Pharmaceutical Journal* 2020 doi: 10.1211/pj.2020.20207844  
40  
41 473 16. Cadogan CA, Hughes CM. On the frontline against COVID-19: Community pharmacists'  
42  
43 474 contribution during a public health crisis. *Research in Social and Administrative Pharmacy*  
44  
45 475 2021;17(1):2032-35. doi: 10.1016/j.sapharm.2020.03.015  
46  
47  
48 476 17. Royal Pharmaceutical Society. RPS guidance on ethical, professional decision making in the  
49  
50 477 COVID-19 Pandemic. London: Royal Pharmaceutical Society, 2020.  
51  
52 478 18. Pharmaceutical Services Negotiating Committee. PSNC Briefing 023/20: Early guidance on the  
53  
54 479 2020/21 Seasonal Influenza Vaccination Advanced Service 2020 [Available from:  
55  
56  
57 480 <https://psnc.org.uk/services-commissioning/psnc-briefings-services-and->  
58  
59  
60

- 1  
2  
3 481 [commissioning/psnc-briefing-023-20-early-guidance-on-the-2020-21-seasonal-influenza-](#)  
4  
5 482 [vaccination-advanced-service/](#).  
6  
7  
8 483 19. Hattingh L, Sim TF, Sunderland B, et al. Successful implementation and provision of enhanced  
9  
10 484 and extended pharmacy services. *Research in Social and Administrative Pharmacy*  
11  
12 485 2020;16(4):464-74. doi: 10.1016/j.sapharm.2019.06.015 [published Online First:  
13  
14 486 2019/07/06]
- 16 487 20. Greenhalgh T, Wong G, Westhorp G, et al. Retrodution in realist evaluation. [Internet].  
18  
19 488 Available from: <http://ramesesproject.org/>. The RAMESES II Project 2017.
- 21 489 21. Wong G. Data Gathering in Realist Reviews: Looking for needles in haystacks. *Doing Realist*  
22  
23 490 *Research*: SAGE Publications Ltd, 2018:131-46.
- 25 491 22. Long N. *Development sociology: actor perspectives*. London: Routledge 2003.
- 27  
28 492 23. National Pharmacy Association. Public see pharmacies as key to the future of healthcare in wake  
29  
30 493 of pandemic 2020 [Available from: [https://www.npa.co.uk/news-and-events/news-](https://www.npa.co.uk/news-and-events/news-item/public-see-pharmacies-as-key-to-the-future-of-healthcare-in-wake-of-pandemic/)  
31  
32 494 [item/public-see-pharmacies-as-key-to-the-future-of-healthcare-in-wake-of-pandemic/](https://www.npa.co.uk/news-and-events/news-item/public-see-pharmacies-as-key-to-the-future-of-healthcare-in-wake-of-pandemic/)  
33  
34 495 accessed 14 Jan 2021.
- 36 496 24. Royal Pharmaceutical Society. RPS Statement on the role of pharmacists in the COVID-19  
38  
39 497 Vaccination Programme London: Royal Pharmaceutical Society; 2020 [Available from:  
40  
41 498 [https://www.rpharms.com/Portals/0/FINAL\\_Statement%20on%20COVID-](https://www.rpharms.com/Portals/0/FINAL_Statement%20on%20COVID-19%20Vaccination_Dec%202020_.pdf?ver=2020-12-02-143304-017)  
42  
43 499 [19%20Vaccination\\_Dec%202020\\_.pdf?ver=2020-12-02-143304-017](https://www.rpharms.com/Portals/0/FINAL_Statement%20on%20COVID-19%20Vaccination_Dec%202020_.pdf?ver=2020-12-02-143304-017) accessed 14/01/2021.
- 45 500 25. Strand MA, Bratberg J, Eukel H, et al. Community Pharmacists' Contributions to Disease  
47  
48 501 Management During the COVID-19 Pandemic. *Preventing Chronic Disease* 2020;17 doi:  
49  
50 502 10.5888/pcd17.200317
- 52 503 26. Elbeddini A, Prabakaran T, Almasalkhi S, et al. Pharmacists and COVID-19. *Journal of*  
53  
54 504 *Pharmaceutical Policy and Practice* 2020;13(1) doi: 10.1186/s40545-020-00241-3

- 1  
2  
3 505 27. Kirkdale CL, Nebout G, Taitel M, et al. Implementation of flu vaccination in community  
4  
5 506 pharmacies: Understanding the barriers and enablers. *Annales Pharmaceutiques Françaises*  
6  
7 507 2017;75(1):9-16. doi: 10.1016/j.pharma.2016.08.006  
8  
9  
10 508 28. Hindi AMK, Jacobs S, Schafheutle EI. Solidarity or dissonance? A systematic review of pharmacist  
11  
12 509 and GP views on community pharmacy services in the UK. *Health & Social Care in the*  
13  
14 510 *Community* 2018;27(3):565-98. doi: 10.1111/hsc.12618  
15  
16  
17 511 29. Deslandes R, Evans A, Baker S, et al. Community pharmacists at the heart of public health: A  
18  
19 512 longitudinal evaluation of the community pharmacy influenza vaccination service. *Research*  
20  
21 513 *in Social and Administrative Pharmacy* 2020;16(4):497-502. doi:  
22  
23 514 10.1016/j.sapharm.2019.06.016  
24  
25  
26 515 30. Sousa Pinto G, Hung M, Okoya F, et al. FIP's response to the COVID-19 pandemic: Global  
27  
28 516 pharmacy rises to the challenge. *Research in Social and Administrative Pharmacy*  
29  
30 517 2021;17(1):1929-33. doi: 10.1016/j.sapharm.2020.07.004  
31  
32  
33 518 31. Gregory PAM, Austin Z. COVID-19: How did community pharmacies get through the first wave?  
34  
35 519 *Canadian Pharmacists Journal / Revue des Pharmaciens du Canada* 2020;153(5):243-51. doi:  
36  
37 520 10.1177/1715163520945741  
38  
39 521 32. Ung COL. Community pharmacist in public health emergencies: Quick to action against the  
40  
41 522 coronavirus 2019-nCoV outbreak. *Research in Social and Administrative Pharmacy*  
42  
43 523 2020;16(4):583-86. doi: 10.1016/j.sapharm.2020.02.003  
44  
45  
46 524 33. Burson RC, Bottenheim AM, Armstrong A, et al. Community pharmacies as sites of adult  
47  
48 525 vaccination: A systematic review. *Human vaccines & immunotherapeutics* 2016;12(12):3146-  
49  
50 526 59. doi: 10.1080/21645515.2016.1215393 [published Online First: 08/15]  
51  
52  
53 527 34. Nadeem MF, Samanta S, Mustafa F. Is the paradigm of community pharmacy practice expected  
54  
55 528 to shift due to COVID-19? *Research in Social and Administrative Pharmacy* 2021;17(1):2046-  
56  
57 529 48. doi: 10.1016/j.sapharm.2020.05.021  
58  
59  
60

- 1  
2  
3 530 35. Francis M, Hinchliffe A, Wales N. Vaccination services through community pharmacy. *Public*  
4  
5 531 *Health Wales NHS Trust, Wales: NHS Wales 2010*  
6  
7 532 36. Clews G. Pharmacists able to administer unlicensed COVID-19 vaccines following legislation  
8  
9 533 changes. *The Pharmaceutical Journal* 2020;305 doi: 10.1211/PJ.2020.20208453  
10  
11 534 37. Welsh Government, Department of Health N. I., Scottish Government, et al. Supporting  
12  
13 535 pharmacists, pharmacy technicians and pharmacy teams throughout the second COVID-19  
14  
15 536 wave, 2020.  
16  
17 537 38. Wickware C. NHS England to choose 'selected' number of pharmacies to deliver at least 1,000  
18  
19 538 COVID-19 vaccines per week. *The Pharmaceutical Journal* 2020 doi:  
20  
21 539 10.1211/PJ.2020.20208608  
22  
23 540 39. Dyer C. Covid-19: Government poised to amend regulations to allow use of unlicensed vaccine.  
24  
25 541 *The BMJ* 2020 doi: <https://doi.org/10.1136/bmj.m3757>  
26  
27 542 40. Cooper RJ. Pestle and mortar: the demise of community pharmacy in the UK. *International*  
28  
29 543 *Journal of Pharmacy Practice* 2020;28(3):205-06. doi: 10.1111/ijpp.12635  
30  
31 544 41. Robinson J. Health professionals delivering unlicensed vaccines need government protection, say  
32  
33 545 health bodies. *The Pharmaceutical Journal* 2020 doi: 10.1211/PJ.2020.20208381  
34  
35 546 42. Warner JG, Portlock J, Smith J, et al. Increasing seasonal influenza vaccination uptake using  
36  
37 547 community pharmacies: experience from the Isle of Wight, England. *International Journal of*  
38  
39 548 *Pharmacy Practice* 2013;21(6):362-67. doi: 10.1111/ijpp.12037  
40  
41 549 43. Hindi AMK, Schafheutle EI, Jacobs S. Community pharmacy integration within the primary care  
42  
43 550 pathway for people with long-term conditions: a focus group study of patients', pharmacists'  
44  
45 551 and GPs' experiences and expectations. *BMC Fam Pract* 2019;20(1):26-26. doi:  
46  
47 552 10.1186/s12875-019-0912-0  
48  
49 553 44. Pharmacy Voice, The Pharmaceutical Services Negotiating Committee, The Royal Pharmaceutical  
50  
51 554 Society, et al. Consultation response: UK Influenza Pandemic Preparedness Strategy 2011.  
52  
53 555 2011  
54  
55  
56  
57  
58  
59  
60

- 1  
2  
3 556 45. Bauman JL. Hero clinical pharmacists and the COVID-19 pandemic: Overworked and overlooked.  
4  
5 557 *JACCP JAm Coll Clin Pharm* 2020  
6  
7 558 46. Stone JK, Pate AN. The Impact of COVID-19 Through the Eyes of a Fourth-Year Pharmacy Student.  
8  
9 559 *American Journal of Pharmaceutical Education* 2020;84(6):ajpe8146. doi: 10.5688/ajpe8146  
10  
11 560 47. Royal College of General Practitioners. Delivering Mass Vaccinations During COVID-19 A Logistical  
12  
13 561 Guide for General Practice. London: Royal College of General Practitioners, 2020.  
14  
15 562 48. NHS. Urgent preparing for General Practice to contribute to a potential COVID-19 Vaccination  
16  
17 563 Programme. In: Service NH, ed. London, 2020.  
18  
19 564 49. NHS England to choose 'selected' number of pharmacies to deliver at least 1,000 COVID-19  
20  
21 565 vaccines per week. *The Pharmaceutical Journal* 2020 doi: 10.1211/pj.2020.20208608  
22  
23 566 50. Koster ES, Philbert D, Bouvy ML. Impact of the COVID-19 epidemic on the provision of  
24  
25 567 pharmaceutical care in community pharmacies. *Research in Social and Administrative*  
26  
27 568 *Pharmacy* 2020 doi: 10.1016/j.sapharm.2020.07.001  
28  
29 569 51. Elbeddini A, Wen CX, Tayefehchamani Y, et al. Mental health issues impacting pharmacists during  
30  
31 570 COVID-19. *Journal of Pharmaceutical Policy and Practice* 2020;13(1) doi: 10.1186/s40545-  
32  
33 571 020-00252-0  
34  
35 572 52. Bukhari N, Rasheed H, Nayyer B, et al. Pharmacists at the frontline beating the COVID-19  
36  
37 573 pandemic. *Journal of Pharmaceutical Policy and Practice* 2020;13 (1) (no  
38  
39 574 pagination)(02000210) doi: <http://dx.doi.org/10.1186/s40545-020-00210-w>  
40  
41 575 53. Anon. Pharmacists on the frontline. *Canadian Pharmacists Journal* 2020;153(4):186-90. doi:  
42  
43 576 10.1177/1715163520930191  
44  
45 577 54. Farrell B, Tsuyuki RT. Pharmacists step up to the challenge of COVID-19. *Canadian Pharmacists*  
46  
47 578 *Journal* 2020;153(4):185. doi: <http://dx.doi.org/10.1177/1715163520930705>  
48  
49 579 55. Bragazzi NL, Mansour M, Bonsignore A, et al. The Role of Hospital and Community Pharmacists in  
50  
51 580 the Management of COVID-19: Towards an Expanded Definition of the Roles,  
52  
53 581 Responsibilities, and Duties of the Pharmacist. *Pharmacy (Basel, Switzerland)* 2020  
54  
55  
56  
57  
58  
59  
60



- 1  
2  
3 582 56. Chan AHY, Rutter V, Ashiru-Oredope D, et al. Together we unite: The role of the Commonwealth  
4  
5 583 in achieving universal health coverage through pharmaceutical care amidst the COVID-19  
6  
7 584 pandemic. *Journal of Pharmaceutical Policy and Practice* 2020;13(1) doi: 10.1186/s40545-  
8  
9 585 020-00214-6  
10  
11  
12 586 57. Moore A. Pharmacists in one county say working with GP practices during the COVID-19  
13  
14 587 pandemic has been 'difficult'. *The Pharmaceutical Journal* 2020 doi:  
15  
16 588 10.1211/PJ.2020.20208556  
17  
18  
19 589 58. Hoti K, Jakupi A, Hetemi D, et al. Provision of community pharmacy services during COVID-19  
20  
21 590 pandemic: a cross sectional study of community pharmacists' experiences with preventative  
22  
23 591 ...: Springer 2020.  
24  
25  
26 592 59. NHS. Urgent preparing for Community Pharmacy to contribute to a potential COVID-19  
27  
28 593 Vaccination Programme. . In: Service NH, ed. London, 2020.  
29  
30 594 60. Austin Z, Martin JC, Gregory PAM. Pharmacy practice in times of civil crisis: The experience of  
31  
32 595 SARS and "the blackout" in Ontario, Canada. *Research in Social and Administrative Pharmacy*  
33  
34 596 2007;3(3):320-35. doi: 10.1016/j.sapharm.2006.09.001  
35  
36  
37 597 61. Chahine EB. The Role of Pharmacists in the Fight Against COVID-19. *Sr Care Pharm*  
38  
39 598 2020;35(7):286-91.  
40  
41 599 62. Jubraj B. Remote consultations: how pharmacy teams can practise them successfully:  
42  
43 600 pharmaceutical-journal.com 2020.  
44  
45  
46 601 63. Royal Pharmaceutical Society. All-Party Pharmacy Group warns of pressures on pharmacies  
47  
48 602 London: Royal Pharmaceutical Society 2020 [Available from:  
49  
50 603 [https://www.rpharms.com/about-us/news/details/All-Party-Pharmacy-Group-warns-of-](https://www.rpharms.com/about-us/news/details/All-Party-Pharmacy-Group-warns-of-pressures-on-pharmacies#:~:text=The%20All%2DParty%20Pharmacy%20Group,continued%20pressures%20facing%20community%20pharmacies)  
51  
52 604 [pressures-on-](https://www.rpharms.com/about-us/news/details/All-Party-Pharmacy-Group-warns-of-pressures-on-pharmacies#:~:text=The%20All%2DParty%20Pharmacy%20Group,continued%20pressures%20facing%20community%20pharmacies)  
53  
54 605 [pharmacies#:~:text=The%20All%2DParty%20Pharmacy%20Group,continued%20pressures%](https://www.rpharms.com/about-us/news/details/All-Party-Pharmacy-Group-warns-of-pressures-on-pharmacies#:~:text=The%20All%2DParty%20Pharmacy%20Group,continued%20pressures%20facing%20community%20pharmacies)  
55  
56 606 [20facing%20community%20pharmacies](https://www.rpharms.com/about-us/news/details/All-Party-Pharmacy-Group-warns-of-pressures-on-pharmacies#:~:text=The%20All%2DParty%20Pharmacy%20Group,continued%20pressures%20facing%20community%20pharmacies). accessed 14/01/2021.  
57  
58  
59  
60

- 1  
2  
3 607 64. Barnes E, Bullock A, Allan M, et al. Community pharmacists' opinions on skill-mix and delegation  
4  
5 608 in England. *International Journal of Pharmacy Practice* 2017;26(5):398-406. doi:  
6  
7 609 10.1111/ijpp.12419  
8  
9  
10 610 65. Saramunee K, Krska J, Mackridge A, et al. How to enhance public health service utilization in  
11  
12 611 community pharmacy?: General public and health providers' perspectives. *Research in Social*  
13  
14 612 *and Administrative Pharmacy* 2014;10(2):272-84. doi: 10.1016/j.sapharm.2012.05.006  
15  
16 613 66. Houle SKD, Grindrod KA, Chatterley T, et al. Paying pharmacists for patient care: A systematic  
17  
18 614 review of remunerated pharmacy clinical care services. *Can Pharm J (Ott)* 2014;147(4):209-  
19  
20 615 32. doi: 10.1177/1715163514536678  
21  
22  
23 616 67. Burns C. Pharmacy staff in Scotland to receive £500 bonus in recognition of COVID-19 service. *the*  
24  
25 617 *Pharmaceutical Journal* 2020 doi: 10.1211/PJ.2020.20208614 [published Online First:  
26  
27 618 12/2020]  
28  
29  
30 619 68. Evans AM, Wood FC, Carter B. National community pharmacy NHS influenza vaccination service  
31  
32 620 in Wales: a primary care mixed methods study. *British Journal of General Practice*  
33  
34 621 2016;66(645):e248-e57. doi: 10.3399/bjgp16x684349  
35  
36  
37 622 69. Moore A. No going back: how the pandemic is changing community pharmacy. *The*  
38  
39 623 *Pharmaceutical Journal* 2020;305 doi: 10.1211/PJ.2020.20208309  
40  
41 624 70. Merks P, Jakubowska M, Drelich E, et al. The legal extension of the role of pharmacists in light of  
42  
43 625 the COVID-19 global pandemic. *Research in Social and Administrative Pharmacy* 2020 doi:  
44  
45 626 10.1016/j.sapharm.2020.05.033  
46  
47  
48 627 71. Zaidi STR, Hasan SS. Personal protective practices and pharmacy services delivery by community  
49  
50 628 pharmacists during COVID-19 pandemic: Results from a national survey. *Research in Social*  
51  
52 629 *and Administrative Pharmacy* 2020  
53  
54  
55 630 72. Anon. Pharmacies must be at the forefront of the COVID-19 vaccination campaign. *The*  
56  
57 631 *Pharmaceutical Journal* 2020;305 doi: 10.1211/PJ.2020.20208546  
58  
59  
60

- 1  
2  
3 632 73. Robinson J. England has lowest number of community pharmacies in five years, figures show.  
4  
5 633 *The Pharmaceutical Journal* 2020 doi: 10.1211/PJ.2020.20208569  
6  
7 634 74. Wickware C. Pharmacies to be paid 50p more per flu vaccination in 2020/2021. *The*  
8  
9 *Pharmaceutical Journal* 2020 doi: 10.1211/PJ.2020.20208362  
10  
11 635  
12 636 75. Doyle-Price J. Pharmacies have an important role in this pandemic – but they need help to  
13  
14 637 continue saving lives. *The Telegraph* 2020.  
15  
16 638 76. Robinson J. Up to 85% of community pharmacies could be in financial deficit by 2024, economic  
17  
18 639 analysis concludes. *The Pharmaceutical Journal* 2020 doi: 10.1211/PJ.2020.20208332  
19  
20 640 77. Wilkinson E, Connelly D. Is pharmacy prepared for a resurgence of COVID-19? *The*  
21  
22 641 *Pharmaceutical Journal* 2020;305 doi: 10.1211/PJ.2020.20208340  
23  
24 642 78. Hayden JC, Parkin R. The challenges of COVID-19 for community pharmacists and opportunities  
25  
26 643 for the future. *Irish Journal of Psychological Medicine* 2020;37(3):198-203. doi:  
27  
28 644 10.1017/ipm.2020.52  
29  
30 645 79. Mercadante AR, Yokota M, Hwang A, et al. Choosing Evolution over Extinction: Integrating Direct  
31  
32 646 Patient Care Services and Value-Based Payment Models into the Community-Based  
33  
34 647 Pharmacy Setting. *Pharmacy* 2020;8(3):128. doi: 10.3390/pharmacy8030128  
35  
36 648 80. Stewart K, Barai R, Priorities N. How to keep your community pharmacy running during the  
37  
38 649 COVID-19 pandemic2020.  
39  
40 650 81. Hussain R, Dawoud DM, Babar Z-U-D. Drive-thru pharmacy services: A way forward to combat  
41  
42 651 COVID-19 pandemic. *Research in Social and Administrative Pharmacy* 2021;17(1):1920-24.  
43  
44 652 doi: 10.1016/j.sapharm.2020.07.015  
45  
46 653 82. Broughel J, Yatsyshina Y. Relax Pharmacy Regulations to Help with COVID-19 Testing and  
47  
48 654 Treatment. *SSRN Electronic Journal* 2020 doi: 10.2139/ssrn.3564463  
49  
50 655 83. Pritchard RI, Huff J, Scheinberg N. Impact of Regulatory Changes on Pharmacist Delivered  
51  
52 656 Telehealth During the COVID-19 Pandemic. *Journal of the American Pharmacists Association*  
53  
54 657 2020;60(6):e76-e79. doi: 10.1016/j.japh.2020.06.004.  
55  
56  
57  
58  
59  
60

- 1  
2  
3 658 84. Lynch M, Leary A. COVID-19 related regulatory change for pharmacists – The case for its  
4  
5 659 retention post the pandemic. *Research in Social and Administrative Pharmacy* 2020  
6  
7 660 85. Erku DA, Belachew SA, Abrha S, et al. When fear and misinformation go viral: Pharmacists' role in  
8  
9 661 deterring medication misinformation during the 'infodemic' surrounding COVID-19. *Research*  
10  
11 662 *in Social and Administrative Pharmacy* 2020 doi: 10.1016/j.sapharm.2020.04.032  
12  
13  
14 663 86. Andrawis M, Carmichael J, Collins CD, et al. Improving patient care and demonstrating value  
15  
16 664 during a global pandemic: Recommendations from leaders of the Pharmacy Accountability  
17  
18 665 Measures Work Group. *American journal of health-system pharmacy : AJHP : official journal*  
19  
20 666 *of the American Society of Health-System Pharmacists* 2020  
21  
22  
23 667 87. Kawaguchi-Suzuki M, Nagai N, Akonoghre RO. COVID-19 Pandemic Challenges and Lessons  
24  
25 668 Learned by Pharmacy Educators Around the Globe. *American Journal of Pharmaceutical*  
26  
27 669 *Education* 2020;84(8) [published Online First: 2020 Aug 1]  
28  
29  
30 670 88. General Pharmaceutical Council. Rising to the challenge [blog] 2020 [Available from:  
31  
32 671 <https://www.pharmacyregulation.org/regulate/blog/rising-challenge> accessed 14/01/2020  
33  
34 672 2020.  
35  
36  
37 673 89. Robinson J. Government consults on allowing pharmacy technicians to administer COVID-19 and  
38  
39 674 flu vaccines. *The Pharmaceutical Journal* 2020 doi: 10.1211/PJ.2020.20208311  
40  
41 675 90. Putt W. Pharmacy Technicians Rise to Meet Patient Needs During Coronavirus Pandemic.  
42  
43 676 *Pharmacy Times* 2020  
44  
45  
46 677 91. Green TC, Bratberg J, Finnell DS. Opioid use disorder and the COVID 19 pandemic: A call to  
47  
48 678 sustain regulatory easements and further expand access to treatment. *Subst Abuse*  
49  
50 679 2020;41(2):147-49.  
51  
52  
53 680 92. Carico R. Pharmacists continue to protect communities during COVID-19. *Journal of the American*  
54  
55 681 *Pharmacists Association* 2020;60(5):660-61. doi: 10.1016/j.japh.2020.08.009  
56  
57 682 93. Bond C, Blenkinsopp A, Inch J, et al. The effect of the new community pharmacy contract on the  
58  
59 683 community pharmacy workforce. *London: Pharmacy Practice Research Trust* 2008;8:9.  
60

- 1  
2  
3 684 94. Melton BL, Lai Z. Review of community pharmacy services: what is being performed, and where  
4  
5 685 are the opportunities for improvement? *Integr Pharm Res Pract* 2017;6:79-89. doi:  
6  
7 686 10.2147/IPRP.S107612  
8  
9  
10 687 95. Wilson CG, Ramage M, Fagan EB. A Primary Care Response to COVID-19 for Patients with an  
11  
12 688 Opioid Use Disorder. *J Rural Health* 2020 doi: 10.1111/jrh.12438  
13  
14 689 96. Kostev K, Lauterbach S. Panic buying or good adherence? Increased pharmacy purchases of drugs  
15  
16 690 from wholesalers in the last week prior to Covid-19 lockdown. *J Psychiatr Res* 2020;130:19-  
17  
18 691 21.  
19  
20  
21 692 97. Bell JS, Reynolds L, Freeman C, et al. Strategies to promote access to medications during the  
22  
23 693 COVID-19 pandemic. *Aust J Gen Pract* 2020;49(8):530-32.  
24  
25 694 98. Romano S, Galante H, Figueira D, et al. Time-trend analysis of medicine sales and shortages  
26  
27 695 during COVID-19 outbreak: Data from community pharmacies. *Research in Social and*  
28  
29 696 *Administrative Pharmacy* 2020 doi: 10.1016/j.sapharm.2020.05.024  
30  
31  
32 697 99. Gross AE, MacDougall C. Roles of the clinical pharmacist during the COVID-19 pandemic. *JACCP*  
33  
34 698 *JAm Coll Clin Pharm* 2020;3(3):564-66.  
35  
36  
37 699 100. Lapeyre-Mestre M, Boucher A, Daveluy A, et al. Addictovigilance contribution during COVID-19  
38  
39 700 epidemic and lockdown in France. *Therapies* 2020 doi:  
40  
41 701 <http://dx.doi.org/10.1016/j.therap.2020.06.006>  
42  
43 702 101. Alderman C. Pharmacy Services and the Novel Coronavirus. *The Senior Care Pharmacist* 2020;35  
44  
45 703 (4):146-47 doi: 10.4140/TCP.n.2020.146  
46  
47  
48 704 102. Hasan SS, Kow CS, Zaidi STR. Social distancing and the use of PPE by community pharmacy  
49  
50 705 personnel: Does evidence support these measures? *Research in Social and Administrative*  
51  
52 706 *Pharmacy* 2020;17(2):456-9.  
53  
54 707 103. Thomas CEL, Phipps DL, Ashcroft DM. When procedures meet practice in community  
55  
56 708 pharmacies: qualitative insights from pharmacists and pharmacy support staff. *BMJ open*  
57  
58 709 2016;6(6):e010851-e51. doi: 10.1136/bmjopen-2015-010851  
60

- 1  
2  
3 710 104. NHS. Standard operating procedure: COVID-19 local vaccination services deployment in  
4  
5 711 community settings. London: National Health Service 2020.  
6  
7 712 105. Cabas P, Di Bella S, Giuffrè M, et al. Community pharmacists' exposure to COVID-19. *Research in*  
8  
9 713 *Social and Administrative Pharmacy* 2021;17(1):1882-87. doi:  
10 714 10.1016/j.sapharm.2020.05.020  
11  
12 715 106. Sum ZZ, Ow CJW. Community pharmacy response to infection control during COVID-19. A cross-  
13  
14 716 sectional survey. *Res Soc Adm Pharm* 2020;17(1):1845-52.  
15  
16 717 107. Al-Quteimat OM, Amer AM. SARS-CoV-2 outbreak: How can pharmacists help? *Research in*  
17  
18 718 *Social and Administrative Pharmacy* 2021;17(2):480-82. doi: 10.1016/j.sapharm.2020.03.018  
19  
20 719 [published Online First: 2020 Mar 26]  
21  
22 720 108. Dawoud D. Emerging from the other end: Key measures for a successful COVID-19 lockdown  
23  
24 721 exit strategy and the potential contribution of pharmacists. *Research in Social and*  
25  
26 722 *Administrative Pharmacy* 2020 doi: 10.1016/j.sapharm.2020.05.011  
27  
28 723 109. Weir NM, Newham R, Bennie M. A literature review of human factors and ergonomics within  
29  
30 724 the pharmacy dispensing process. *Research in Social and Administrative Pharmacy*  
31  
32 725 2020;16(5):637-45. doi: 10.1016/j.sapharm.2019.08.029  
33  
34 726 110. Maine LL. An Unparalleled Spirit of Collaboration Amid the COVID-19 Pandemic. *Am J Pharm*  
35  
36 727 *Educ* 2020;84(6):ajpe8155-ajpe55.  
37  
38 728 111. Dowden A. Will Serious Shortage Protocols help ease drug shortages? *Prescriber* 2020;31(5):29-  
39  
40 729 31. doi: <https://doi.org/10.1002/psb.1844>  
41  
42 730 112. NHS England, NHS Improvement. Novel coronavirus (COVID-19) standard operating procedure-  
43  
44 731 Community Pharmacy. Available on: [https://www.](https://www.england.nhs.uk/wp-content/uploads/2020/02/20200305-COVID-19-PRIMARY-CARE-SOP-COMM-PHARM-PUBLICATION-V1) england. nhs. uk/wp-  
45  
46 732 content/uploads/2020/02/20200305-COVID-19-PRIMARY-CARE-SOP-COMM-PHARM-  
47  
48 733 PUBLICATION-V1. 2020 Apr;1: skills4pharmacy.org.uk 2020.  
49  
50 734 113. Butt M. Covid-19 vaccination: Logistical challenges for general practice. *Practice Management*  
51  
52 735 2021;31(1):20-21. doi: 10.12968/prma.2021.31.1.20  
53  
54  
55  
56  
57  
58  
59  
60

- 1  
2  
3 736 114. National Pharmacy Association (NPA). Pharmacy on the NHS frontline 2020 [Available from:  
4  
5 737 <https://nhsfrontline.com/coronavirus-stories-from-the-health-service-frontline/> accessed  
6  
7 738 17/08/2020 2020.
- 9  
10 739 115. Pharmaceutical Services Negotiating Committee. Community Pharmacy Contractual  
11  
12 740 Framework: Pharmaceutical Services Negotiating Committee; 2021 [Available from:  
13  
14 741 <https://psnc.org.uk/contract-it/the-pharmacy-contract/>.
- 16 742 116. Quinn B. UK pharmacists facing abuse and violence during lockdown. *The Guardian* 2020 Apr  
17  
18 743 2nd 2020.
- 20 744 117. Wickware C. Health board pilots delivery of flu vaccines by pharmacy technicians to manage  
21  
22 745 increased demand. *The Pharmaceutical Journal* 2020 doi: 10.1211/PJ.2020.20208565
- 24 746 118. Royal Pharmaceutical Society. The future of pharmacy in a sustainable NHS: Key principles for  
25  
26 747 transformation and growth. London: Royal Pharmaceutical Society, 2020.
- 28 748 119. Sparkman A, Brookhart AL, Goode J-VKR. The impact of an immunization check-up at a  
29  
30 749 pharmacist-provided employee health screening. *Journal of the American Pharmacists*  
31  
32 750 *Association* 2017;57(3):S274-S78. doi: 10.1016/j.japh.2017.02.010
- 34 751 120. Rodgers RM, Gammie SM, Loo RL, et al. Comparison of pharmacist and public views and  
35  
36 752 experiences of community pharmacy medicines-related services in England. *Patient Prefer*  
37  
38 753 *Adherence* 2016;10:1749-58. doi: 10.2147/PPA.S112931
- 40 754 121. Hindi AMK, Schafheutle EI, Jacobs S. Patient and public perspectives of community pharmacies  
41  
42 755 in the United Kingdom: A systematic review. *Health Expectations* 2017;21(2):409-28. doi:  
43  
44 756 10.1111/hex.12639
- 46 757 122. Letley L, Ramsay M. Discussing the MMR vaccine with patients. *The Pharmaceutical Journal*  
47  
48 758 2019 doi: 10.1211/pj.2019.20205819
- 50 759 123. Kember J, Hodson K, James DH. The public's perception of the role of community pharmacists in  
51  
52 760 Wales. *International Journal of Pharmacy Practice* 2017;26(2):120-28. doi:  
53  
54 761 10.1111/ijpp.12375

- 1  
2  
3 762 124. Gidman W, Ward P, McGregor L. Understanding public trust in services provided by community  
4  
5 763 pharmacists relative to those provided by general practitioners: a qualitative study. *BMJ*  
6  
7 764 *open* 2012;2(3):e000939. doi: 10.1136/bmjopen-2012-000939  
9  
10 765 125. McConeghy KW, Wing C. A national examination of pharmacy-based immunization statutes and  
11  
12 766 their association with influenza vaccinations and preventive health. *Vaccine* 2016  
13  
14 767 126. Cheong MWL, Brock T, Karwa R, et al. COVID-19 and Clinical Pharmacy Worldwide - A Wake Up  
15  
16 768 Call and a Call to Action. *JACCP JAm Coll Clin Pharm* 2020;3(5):860-63.  
18  
19 769 127. Adunlin G, Murphy PZ, Manis M. COVID-19: How Can Rural Community Pharmacies Respond to  
20  
21 770 the Outbreak? *J Rural Health* 2020 doi: 10.1111/jrh.12439  
22  
23 771 128. Aruru M, Truong HA, Clark S. Pharmacy Emergency Preparedness and Response (PEPR)  
24  
25 772 framework for expanding pharmacy professionals' roles and contributions to emergency  
26  
27 773 preparedness .... *Research in Social and Administrative Pharmacy* 2020;17(1):1967-77.  
29  
30 774 129. Fiore V. GP referrals under CPCS to go live November 1, NHSE confirms. *Chemist and Druggist*  
31  
32 775 2020  
33  
34 776 130. Robinson J. Public Health England to review guidance against the use of rapid COVID-19 tests in  
35  
36 777 community pharmacies. *the Pharmaceutical Journal* 2020;305 doi:  
37  
38 778 10.1211/PJ.2020.20208550  
39  
40  
41 779 131. Buchan SA, Rosella LC, Finkelstein M, et al. Impact of pharmacist administration of influenza  
42  
43 780 vaccines on uptake in Canada. *Canadian Medical Association Journal* 2016;189(4):E146-E52.  
44  
45 781 doi: 10.1503/cmaj.151027  
46  
47  
48 782 132. Calo WA, Shah PD, Gilkey MB, et al. Implementing pharmacy-located HPV vaccination: findings  
49  
50 783 from pilot projects in five U.S. states. *Human Vaccines & Immunotherapeutics* 2019;15(7-  
51  
52 784 8):1831-38. doi: 10.1080/21645515.2019.1602433  
53  
54  
55 785 133. Anderson C, Thornley T. "It's easier in pharmacy": why some patients prefer to pay for flu jabs  
56  
57 786 rather than use the National Health Service. *BMC Health Services Research* 2014;14(1) doi:  
58  
59 787 10.1186/1472-6963-14-35  
60



- 1  
2  
3 788 134. Baroy J, Chung D, Frisch R, et al. The impact of pharmacist immunization programs on adult  
4  
5 789 immunization rates: a systematic review and meta-analysis. *Journal of the American*  
6  
7 790 *Pharmacists Association* 2016;56(4):418-26.
- 9  
10 791 135. Anderson C, Thornley T. Who uses pharmacy for flu vaccinations? Population profiling through a  
11  
12 792 UK pharmacy chain. *International Journal of Clinical Pharmacy* 2016;38(2):218-22. doi:  
13  
14 793 10.1007/s11096-016-0255-z
- 16 794 136. Pharmacy Guild of Australia. 93 per cent of Aussies recognise benefits of flu shot in pharmacy–  
17  
18 795 Pharmacy Guild of Australia [blog]: Pharmacy Guild of Australia 2017.
- 20  
21 796 137. Latif A, Tariq S, Abbasi N, et al. Giving Voice to the Medically Under-Served: A Qualitative Co-  
22  
23 797 Production Approach to Explore Patient Medicine Experiences and Improve Services to  
24  
25 798 Marginalized Communities. *Pharmacy (Basel, Switzerland)* 2018;6(1):13. doi:  
26  
27 799 10.3390/pharmacy6010013
- 29  
30 800 138. Anderson C, Blenkinsopp A, Armstrong M. Feedback from community pharmacy users on the  
31  
32 801 contribution of community pharmacy to improving the public's health: a systematic review  
33  
34 802 of the peer reviewed and non-peer reviewed literature 1990-2002. *Health Expect*  
35  
36 803 2004;7(3):191-202. doi: 10.1111/j.1369-7625.2004.00274.x
- 38  
39 804 139. Eades CE, Ferguson JS, O'Carroll RE. Public health in community pharmacy: a systematic review  
40  
41 805 of pharmacist and consumer views. *BMC public health* 2011;11:582-82. doi: 10.1186/1471-  
42  
43 806 2458-11-582
- 45  
46 807 140. Hassell K, Rogers A, Noyce P. Community pharmacy as a primary health and self-care resource:  
47  
48 808 a framework for understanding pharmacy utilization. *Health and Social Care in the*  
49  
50 809 *Community* 2000;8(1):40-49. doi: 10.1046/j.1365-2524.2000.00222.x
- 51  
52 810 141. Alkhalili M, Ma J, Grenier S. Defining Roles for Pharmacy Personnel in Disaster Response and  
53  
54 811 Emergency Preparedness. *Disaster Medicine and Public Health Preparedness*  
55  
56 812 2017;11(4):496-504. doi: 10.1017/dmp.2016.172
- 57  
58  
59  
60

- 1  
2  
3 813 142. Ford H, Dallas CE, Harris C. Examining Roles Pharmacists Assume in Disasters: A Content  
4  
5 814 Analytic Approach. *Disaster Medicine and Public Health Preparedness* 2013;7(6):563-72. doi:  
6  
7 815 10.1017/dmp.2013.99  
8  
9  
10 816 143. Schwerzmann J, Graitcer SB, Jester B, et al. Evaluating the Impact of Pharmacies on Pandemic  
11  
12 817 Influenza Vaccine Administration. *Disaster Medicine and Public Health Preparedness*  
13  
14 818 2017;11(5):587-93. doi: 10.1017/dmp.2017.1  
15  
16 819 144. Donald M, King-Shier K, Tsuyuki RT, et al. Patient, family physician and community pharmacist  
17  
18 820 perspectives on expanded pharmacy scope of practice: a qualitative study. *CMAJ Open*  
19  
20 821 2017;5(1):E205-E12. doi: 10.9778/cmajo.20160135  
21  
22  
23 822 145. Mossialos E, Courtin E, Naci H, et al. From “retailers” to health care providers: Transforming the  
24  
25 823 role of community pharmacists in chronic disease management. *Health Policy*  
26  
27 824 2015;119(5):628-39. doi: 10.1016/j.healthpol.2015.02.007  
28  
29  
30 825 146. Mossialos E, Naci H, Courtin E. Expanding the role of community pharmacists: Policymaking in  
31  
32 826 the absence of policy-relevant evidence? *Health Policy* 2013;111(2):135-48. doi:  
33  
34 827 10.1016/j.healthpol.2013.04.003  
35  
36  
37 828 147. Ilardo ML, Speciale A. The Community Pharmacist: Perceived Barriers and Patient-Centered  
38  
39 829 Care Communication. *International Journal of Environmental Research and Public Health*  
40  
41 830 2020;17(2):536. doi: 10.3390/ijerph17020536  
42  
43 831 148. Daly CJ, Quinn B, Mak A, et al. Community Pharmacists’ Perceptions of Patient Care Services  
44  
45 832 within an Enhanced Service Network. *Pharmacy* 2020;8(3):172.  
46  
47  
48 833 149. Ecartot F, Crepaldi G, Juvin P, et al. Pharmacy-based interventions to increase vaccine uptake:  
49  
50 834 report of a multidisciplinary stakeholders meeting. *BMC Public Health* 2019;19(1) doi:  
51  
52 835 10.1186/s12889-019-8044-y  
53  
54  
55 836 150. Moullin JC, Sabater-Hernández D, Fernandez-Llimos F, et al. Defining professional pharmacy  
56  
57 837 services in community pharmacy. *Research in Social and Administrative Pharmacy*  
58  
59 838 2013;9(6):989-95. doi: 10.1016/j.sapharm.2013.02.005  
60

- 1  
2  
3 839 151. NHS England. General practice forward view: NHS England, 2016.  
4  
5 840 152. Milosavljevic A, Aspden T, Harrison J. Community pharmacist-led interventions and their impact  
6  
7 841 on patients' medication adherence and other health outcomes: a systematic review. *The*  
8  
9 842 *International journal of pharmacy practice* 2018;26(5):387-97. doi: 10.1111/ijpp.12462  
10  
11 843 [published Online First: 2018/06/22]  
12  
13  
14 844 153. Justwan F, Baumgaertner B, Carlisle JE, et al. The effect of trust and proximity on vaccine  
15  
16 845 propensity. *PLOS One* 2019;14(8):e0220658. doi: 10.1371/journal.pone.0220658  
17  
18  
19 846 154. Pharmaceutical Services Negotiating Committee. Preparations for a potential COVID-19  
20  
21 847 vaccination programme.: Pharmaceutical Services Negotiating Committee; 2020 [Available  
22  
23 848 from: [https://psnc.org.uk/our-news/preparations-for-a-potential-covid-19-vaccination-](https://psnc.org.uk/our-news/preparations-for-a-potential-covid-19-vaccination-programme/)  
24  
25 849 [programme/](https://psnc.org.uk/our-news/preparations-for-a-potential-covid-19-vaccination-programme/) accessed 08/11/2020.  
26  
27  
28  
29 850  
30  
31  
32  
33  
34  
35  
36  
37  
38  
39  
40  
41  
42  
43  
44  
45  
46  
47  
48  
49  
50  
51  
52  
53  
54  
55  
56  
57  
58  
59  
60

Appendix 1 – Search terms  
 Search log – 28<sup>th</sup> August 2020

| Source                             | Date searched | Search strategy                                                                                                                                                                                                                                                                                                                                                                                                                                                                                                                                                                                                                                                                                                                                                                                                                                                                                                                                                                                                                                   | Hits (or records obtained from searches) |
|------------------------------------|---------------|---------------------------------------------------------------------------------------------------------------------------------------------------------------------------------------------------------------------------------------------------------------------------------------------------------------------------------------------------------------------------------------------------------------------------------------------------------------------------------------------------------------------------------------------------------------------------------------------------------------------------------------------------------------------------------------------------------------------------------------------------------------------------------------------------------------------------------------------------------------------------------------------------------------------------------------------------------------------------------------------------------------------------------------------------|------------------------------------------|
| Publish or Perish (Google Scholar) | 31/07/2020    | Pharmacy[titl] AND Covid*                                                                                                                                                                                                                                                                                                                                                                                                                                                                                                                                                                                                                                                                                                                                                                                                                                                                                                                                                                                                                         | 715                                      |
| Publish or Perish (Google Scholar) | 31/07/2020    | Pharmacist[titl] AND Covid*                                                                                                                                                                                                                                                                                                                                                                                                                                                                                                                                                                                                                                                                                                                                                                                                                                                                                                                                                                                                                       | 225                                      |
| Ovid MEDLINE                       | 31/07/2020    | exp Coronavirus/ OR exp Coronavirus Infections/ OR (coronavirus* OR 2019-nCoV OR 2019 nCoV OR nCov OR Covid-19 OR Covid19 OR SARS-CoV-2 OR novel coronavirus OR novel corona virus OR covid* or coronavirus 2 OR coronavirus infection* OR coronavirus disease OR corona virus disease OR new coronavirus OR new corona virus OR new coronaviruses OR novel coronaviruses OR wuhan) AND (Community pharmacy OR community pharmacies OR community pharmacist OR community pharmacists OR retail pharmacy OR retail pharmacist OR retail pharmacists OR dispensing chemist OR dispensing chemists OR [(Pharmacist OR pharmacy) AND (community OR "primary care")]) OR dispensary OR apothecary OR druggist)                                                                                                                                                                                                                                                                                                                                         | 61                                       |
| 28 <sup>th</sup> August 2020       | EMBASE        | <ol style="list-style-type: none"> <li>exp Coronavirus/ or exp Coronavirus Infections/ or (coronavirus* or "2019-nCoV" or " 2019 nCoV" or nCov or "Covid-19" or Covid19 or "SARS-CoV-2" or "novel coronavirus" or "novel corona virus" or covid* or "coronavirus 2" or "coronavirus infection*" or "coronavirus disease" or "corona virus disease" or "new coronavirus" or "new corona virus" or "new coronaviruses" or "novel coronaviruses" or wuhan).mp. [mp=title, abstract, heading word, drug trade name, original title, device manufacturer, drug manufacturer, device trade name, keyword, floating subheading word, candidate term word] 78202</li> <li>("Community pharmacy" or "community pharmacies" or "community pharmacist" or "community pharmacists" or "retail pharmacy" or "retail pharmacist" or "retail pharmacists" or "dispensing chemist" or "dispensing chemists" or dispensary or apothecary or druggist).mp. [mp=title, abstract, heading word, drug trade name, original title, device manufacturer, drug</li> </ol> | 52 hits                                  |

|                              |                |                                                                                                                                                                                                                                                                                                                                                                                                                                                                                                                                                                                                                                                                                                                                                                                                                            |         |
|------------------------------|----------------|----------------------------------------------------------------------------------------------------------------------------------------------------------------------------------------------------------------------------------------------------------------------------------------------------------------------------------------------------------------------------------------------------------------------------------------------------------------------------------------------------------------------------------------------------------------------------------------------------------------------------------------------------------------------------------------------------------------------------------------------------------------------------------------------------------------------------|---------|
|                              |                | <p>manufacturer, device trade name, keyword, floating subheading word, candidate term word] 15896</p> <p>3. ((Pharmacist or pharmacy or pharmacies) and (community or "primary care")).mp. [mp=title, abstract, heading word, drug trade name, original title, device manufacturer, drug manufacturer, device trade name, keyword, floating subheading word, candidate term word] 26928</p> <p>4. 2 or 3 29215</p> <p>5. 1 and 4 89</p> <p>6. limit 5 to medline 37</p> <p>7. 5 not 6</p>                                                                                                                                                                                                                                                                                                                                  |         |
| 28 <sup>th</sup> August 2020 | CINAHL         | <p>(((( "Community pharmacy" or "community pharmacies" or "community pharmacist" or "community pharmacists" or "retail pharmacy" or "retail pharmacist" or "retail pharmacists" or "dispensing chemist" or "dispensing chemists" or dispensary or apothecary or druggist) ) OR ( ((Pharmacist or pharmacy or pharmacies) and (community or "primary care"))) )) AND exp Coronavirus/ or exp Coronavirus Infections/ or (coronavirus* or "2019-nCoV" or " 2019 ncov" or nCov or "Covid-19" or Covid19 or "SARS-CoV-2" or "novel coronavirus" or "novel corona virus" or covid* or "coronavirus 2" or "coronavirus infection*" or "coronavirus disease" or "corona virus disease" or "new coronavirus" or "new corona virus" or "new coronaviruses" or "novel coronaviruses" or wuhan)</p>                                   | 24 hits |
| 28 <sup>th</sup> August 2020 | Web of Science | <p># 4 14 #1 AND #2</p> <p>Refined by: [excluding] Databases: ( MEDLINE )</p> <p>Databases= WOS, BCI, BIOSIS, CCC, DRCI, DIIDW, KJD, MEDLINE, RSCI, SCIELO, ZOOREC Timespan=All years</p> <p># 3 102 #1 AND #2</p> <p>Databases= WOS, BCI, BIOSIS, CCC, DRCI, DIIDW, KJD, MEDLINE, RSCI, SCIELO, ZOOREC Timespan=All years</p> <p># 2 32,714 TS=((("Community pharmacy" or "community pharmacies" or "community pharmacist" or "community pharmacists" or "retail pharmacy" or "retail pharmacist" or "retail pharmacists" or "dispensing chemist" or "dispensing chemists" or dispensary or apothecary or druggist) ) OR ( ((Pharmacist or pharmacy or pharmacies) and (community or "primary care"))) ))</p> <p>Databases= WOS, BCI, BIOSIS, CCC, DRCI, DIIDW, KJD, MEDLINE, RSCI, SCIELO, ZOOREC Timespan=All years</p> | 14 hits |

|                              |        |                                                                                                                                                                                                                                                                                                                                                                                                                                                                                                                                                                                                                                |                                     |
|------------------------------|--------|--------------------------------------------------------------------------------------------------------------------------------------------------------------------------------------------------------------------------------------------------------------------------------------------------------------------------------------------------------------------------------------------------------------------------------------------------------------------------------------------------------------------------------------------------------------------------------------------------------------------------------|-------------------------------------|
|                              |        | # 1 95,896 TS=(coronavirus* or "2019-nCoV" or " 2019 ncov" or nCov or "Covid-19" or Covid19 or "SARS-CoV-2" or "novel coronavirus" or "novel corona virus" or covid* or "coronavirus 2" or "coronavirus infection*" or "coronavirus disease" or "corona virus disease" or "new coronavirus" or "new corona virus" or "new coronaviruses" or "novel coronaviruses" or wuhan)<br><br>Databases= WOS, BCI, BIOSIS, CCC, DRCI, DIIDW, KJD, MEDLINE, RSCI, SCIELO, ZOOREC Timespan=All years                                                                                                                                        |                                     |
| 28 <sup>th</sup> August 2020 | Scopus | ( TITLE-ABS-KEY ( coronavirus* OR "2019-nCoV" OR " 2019 ncov" OR ncov OR "Covid-19" OR covid19 OR "SARS-CoV-2" OR "novel coronavirus" OR "novel corona virus" OR covid* OR "coronavirus 2" OR "coronavirus infection*" OR "coronavirus disease" ) ) AND ( ( ( ( "Community pharmacy" OR "community pharmacies" OR "community pharmacist" OR "community pharmacists" OR "retail pharmacy" OR "retail pharmacist" OR "retail pharmacists" OR "dispensing chemist" OR "dispensing chemists" OR dispensary OR apothecary OR druggist ) ) OR ( ( pharmacist OR pharmacy OR pharmacies ) AND ( community OR "primary care" ) ) ) ) ) | 591 hits                            |
| 28 <sup>th</sup> August 2020 |        | Search of the contents of preprint services and the WHO Covid register: pharmacy OR pharmacist OR pharmacists or pharmacies                                                                                                                                                                                                                                                                                                                                                                                                                                                                                                    | (402 hits)                          |
| 28 <sup>th</sup> August 2020 |        | e.g. the curated BioRxiv/MedRxiv dataset (connect.medrxiv.org/relate/content/181).                                                                                                                                                                                                                                                                                                                                                                                                                                                                                                                                             | 10 hits and 19 hits – none relevant |
| 28 <sup>th</sup> August 2020 |        | Social media (e.g. blogs) including facilitated twitter® discussion (#Cpharmchat) on the Impact of COVID-19 on community pharmacy.                                                                                                                                                                                                                                                                                                                                                                                                                                                                                             | Twitter 8 hits                      |
| 28 <sup>th</sup> August 2020 |        | Web-sites/emails from relevant regulators and professional organisations including RPS ( <a href="https://www.rpharms.com/">https://www.rpharms.com/</a> ), PDA ( <a href="https://www.the-pda.org/">https://www.the-pda.org/</a> ), PSNC ( <a href="http://psnc.org.uk/">http://psnc.org.uk/</a> ), and GPhC ( <a href="https://www.pharmacyregulation.org/">https://www.pharmacyregulation.org/</a> ).                                                                                                                                                                                                                       | Completed                           |
| 28 <sup>th</sup> August 2020 |        | Pharmaceutical Journal web-site <a href="https://www.pharmaceutical-journal.com/">https://www.pharmaceutical-journal.com/</a> . No language restrictions at title and abstract stage selection stage. Separated high and low/middle income countries at sift stage.                                                                                                                                                                                                                                                                                                                                                            | Completed                           |
| 28 <sup>th</sup> August 2020 |        | Local Pharmaceutical Committees (LPC)                                                                                                                                                                                                                                                                                                                                                                                                                                                                                                                                                                                          | Completed                           |

Appendix 2 - Literature inclusion criteria

Published after January 2003 AND  
COVID-19 or other pandemic or other infectious diseases  
OR vaccination programmes  
OR expanded/extended roles  
AND Community Pharmacy  
AND High- or middle-income country

For peer review only

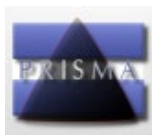

# PRISMA 2009 Flow Diagram

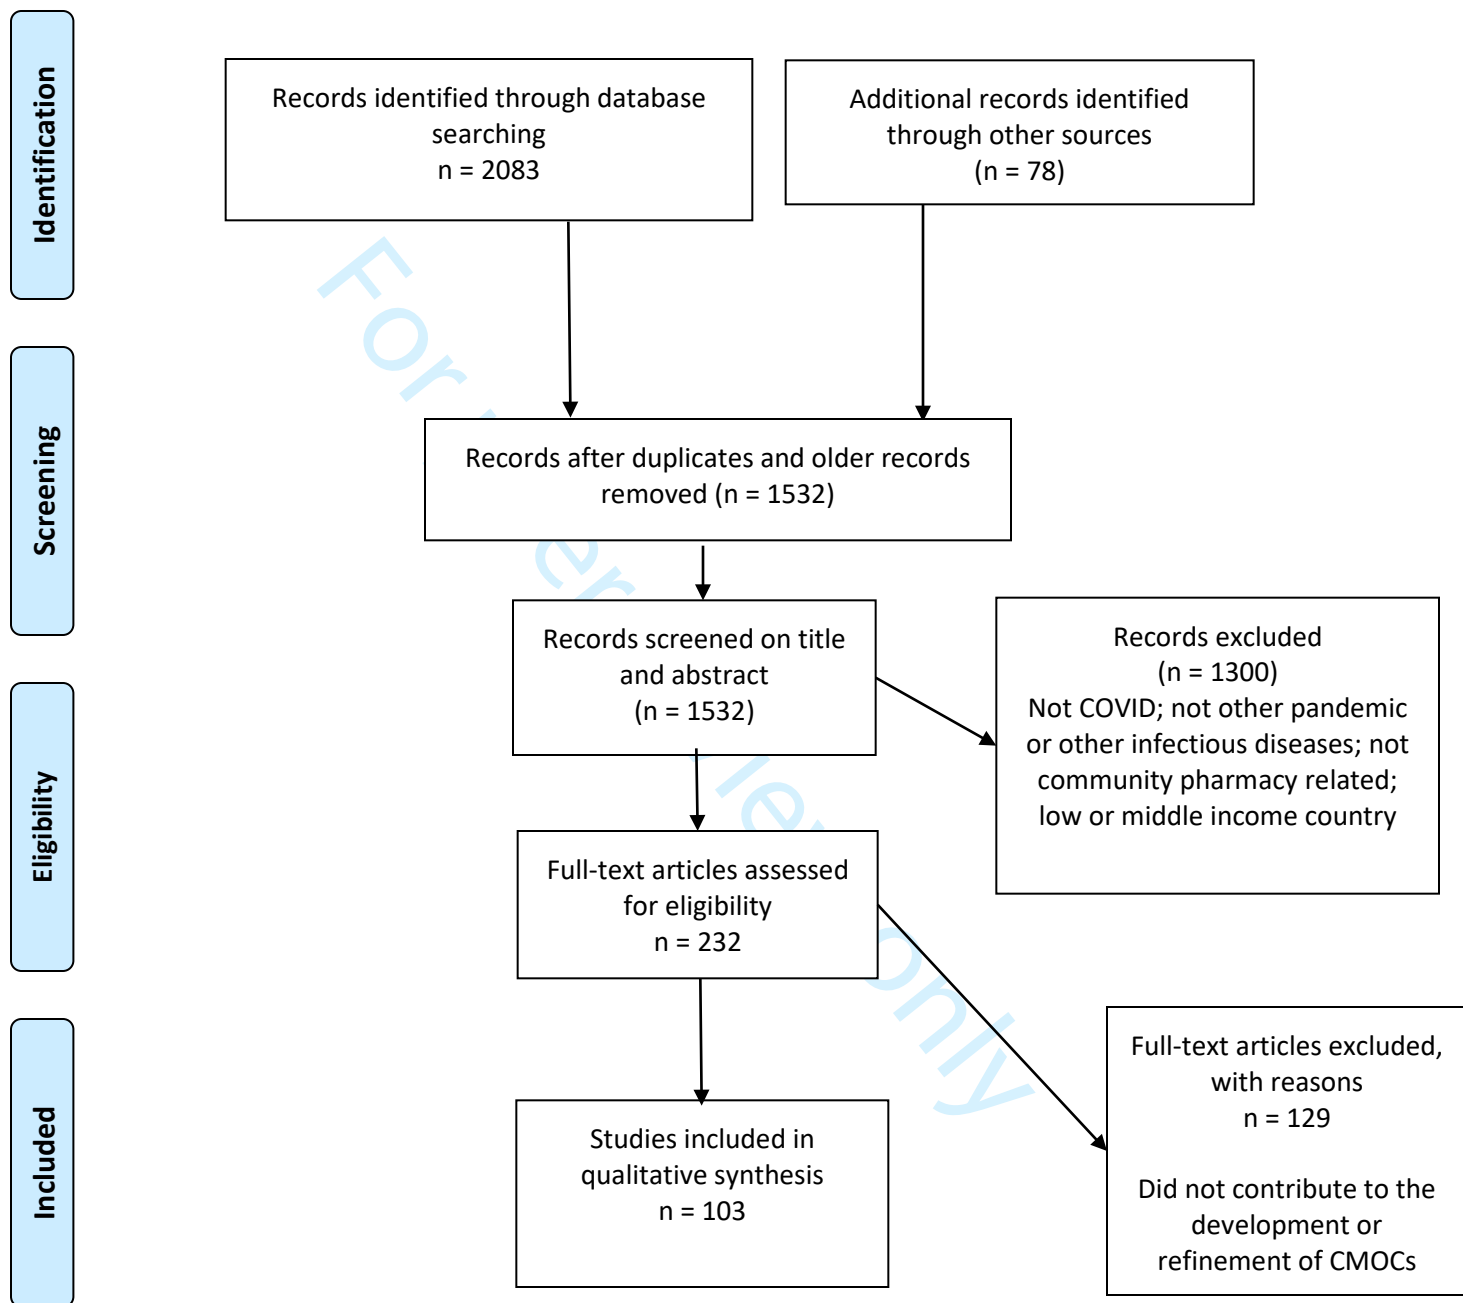

From: Moher D, Liberati A, Tetzlaff J, Altman DG, The PRISMA Group (2009). Preferred Reporting Items for Systematic Reviews and Meta-Analyses: The PRISMA Statement. PLoS Med 6(7): e1000097. doi:10.1371/journal.pmed1000097

For more information, visit [www.prisma-statement.org](http://www.prisma-statement.org).

For peer review only - <http://bmjopen.bmj.com/site/about/guidelines.xhtml>



Appendix 4 - A simplified diagram of the programme theory of a COVID-19 vaccination programme provided by community pharmacies

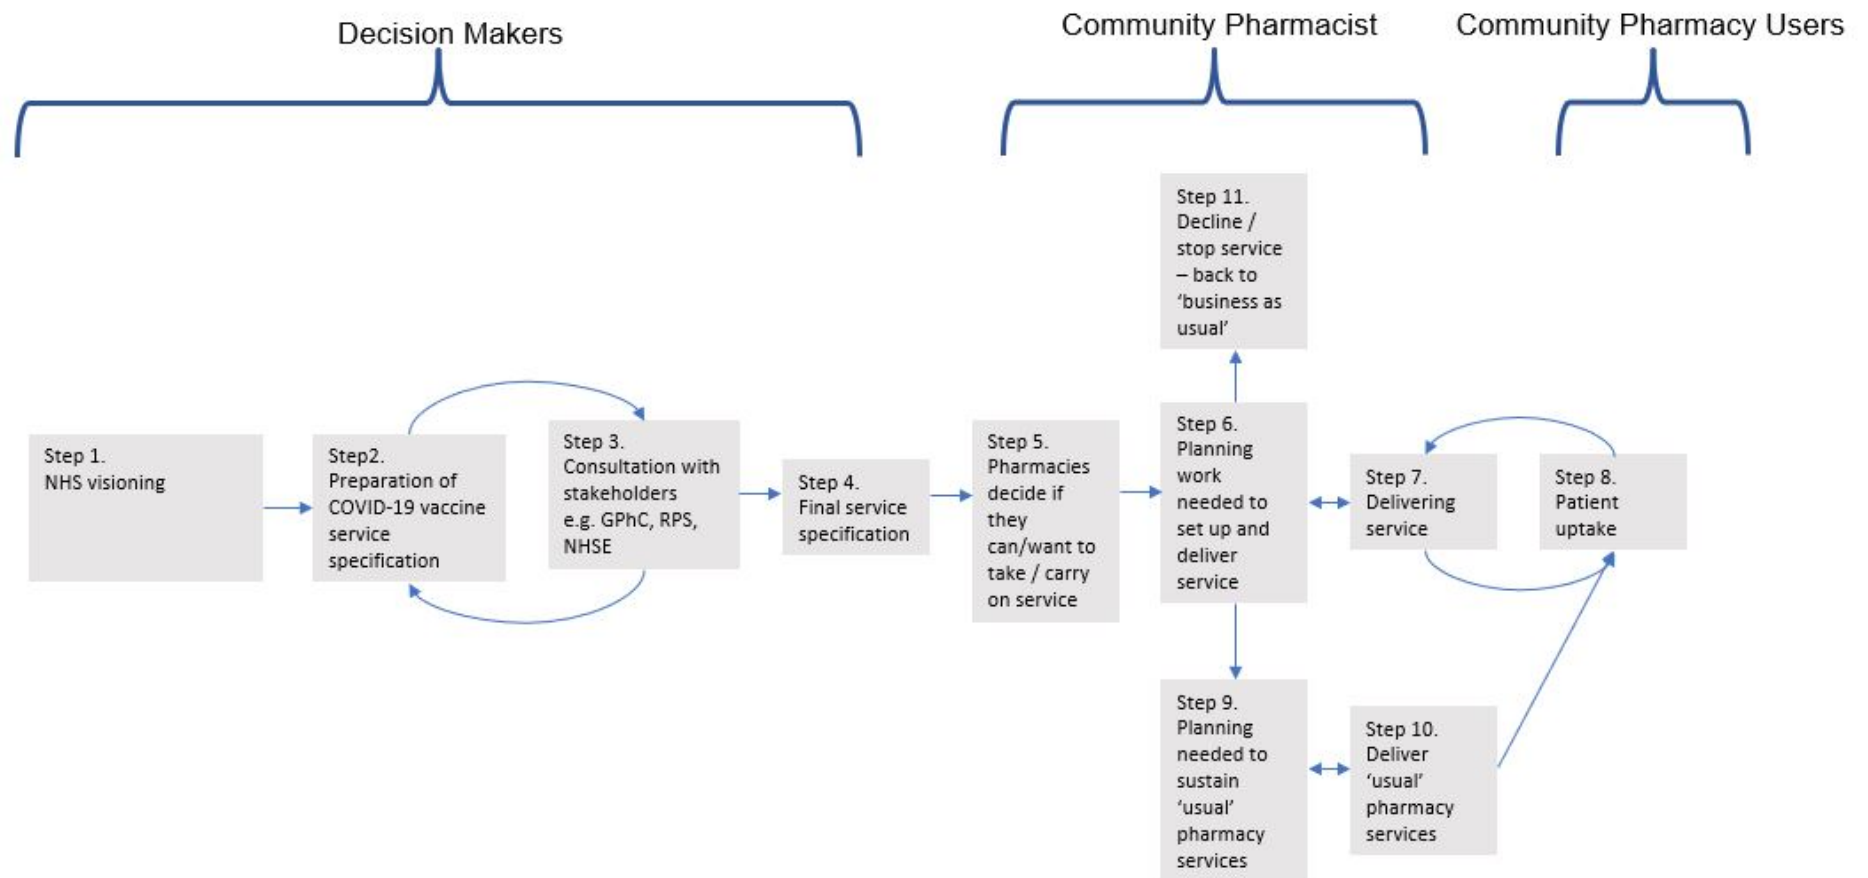

# BMJ Open

## A Rapid Realist Review of the Role of Community Pharmacy in the Public Health Response to COVID-19

|                                 |                                                                                                                                                                                                                                                                                                                                                                                                                                                                                      |
|---------------------------------|--------------------------------------------------------------------------------------------------------------------------------------------------------------------------------------------------------------------------------------------------------------------------------------------------------------------------------------------------------------------------------------------------------------------------------------------------------------------------------------|
| Journal:                        | <i>BMJ Open</i>                                                                                                                                                                                                                                                                                                                                                                                                                                                                      |
| Manuscript ID                   | bmjopen-2021-050043.R1                                                                                                                                                                                                                                                                                                                                                                                                                                                               |
| Article Type:                   | Original research                                                                                                                                                                                                                                                                                                                                                                                                                                                                    |
| Date Submitted by the Author:   | 24-Mar-2021                                                                                                                                                                                                                                                                                                                                                                                                                                                                          |
| Complete List of Authors:       | Maidment, Ian; Aston University<br>Young, Emma; The University of Sheffield<br>MacPhee, Maura; The University of British Columbia<br>Booth, Andrew; The University of Sheffield, School of Health & Related Research (SchARR)<br>Zaman, Hadar; University of Bradford<br>Breen, Juanita; University of Tasmania<br>Hilton, Andrea; University of Hull, FHSC<br>Kelly, Tony; Aston University, PPI Lead on Project<br>Wong, Geoff; University of Oxford, Primary Care Health Sciences |
| <b>Primary Subject Heading</b>: | Health services research                                                                                                                                                                                                                                                                                                                                                                                                                                                             |
| Secondary Subject Heading:      | General practice / Family practice, Infectious diseases                                                                                                                                                                                                                                                                                                                                                                                                                              |
| Keywords:                       | COVID-19, QUALITATIVE RESEARCH, Organisation of health services < HEALTH SERVICES ADMINISTRATION & MANAGEMENT                                                                                                                                                                                                                                                                                                                                                                        |
|                                 |                                                                                                                                                                                                                                                                                                                                                                                                                                                                                      |

SCHOLARONE™  
Manuscripts

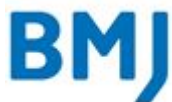

I, the Submitting Author has the right to grant and does grant on behalf of all authors of the Work (as defined in the below author licence), an exclusive licence and/or a non-exclusive licence for contributions from authors who are: i) UK Crown employees; ii) where BMJ has agreed a CC-BY licence shall apply, and/or iii) in accordance with the terms applicable for US Federal Government officers or employees acting as part of their official duties; on a worldwide, perpetual, irrevocable, royalty-free basis to BMJ Publishing Group Ltd ("BMJ") its licensees and where the relevant Journal is co-owned by BMJ to the co-owners of the Journal, to publish the Work in this journal and any other BMJ products and to exploit all rights, as set out in our [licence](#).

The Submitting Author accepts and understands that any supply made under these terms is made by BMJ to the Submitting Author unless you are acting as an employee on behalf of your employer or a postgraduate student of an affiliated institution which is paying any applicable article publishing charge ("APC") for Open Access articles. Where the Submitting Author wishes to make the Work available on an Open Access basis (and intends to pay the relevant APC), the terms of reuse of such Open Access shall be governed by a Creative Commons licence – details of these licences and which [Creative Commons](#) licence will apply to this Work are set out in our licence referred to above.

Other than as permitted in any relevant BMJ Author's Self Archiving Policies, I confirm this Work has not been accepted for publication elsewhere, is not being considered for publication elsewhere and does not duplicate material already published. I confirm all authors consent to publication of this Work and authorise the granting of this licence.

1  
2  
3  
4  
5 1 A Rapid Realist Review of the Role of Community Pharmacy in  
6  
7  
8  
9 2 the Public Health Response to COVID-19  
10  
11  
12

13 3 Ian Maidment (corresponding author), Aston University, Birmingham, B4 7ET, UK,  
14  
15 4 [i.maidment@aston.ac.uk](mailto:i.maidment@aston.ac.uk), Phone/fax: 0121-204-3000; Emma Young, University of Sheffield,  
16  
17 5 Sheffield, UK; Maura MacPhee, University of British Columbia, Vancouver, Canada; Andrew Booth,  
18  
19 6 University of Sheffield, Sheffield, UK; Hadar Zaman, University of Bradford, Bradford, UK; Juanita  
20  
21 7 Breen, University of Tasmania, Hobart; Andrea Hilton, University of Hull, Hull, UK; Tony Kelly, PPI  
22  
23 8 Lead (Aston University), Birmingham, UK; Geoffrey Wong, University of Oxford, Oxford, UK.  
24  
25  
26  
27 9

28  
29 10 Keywords: COVID-19, SARS-CoV-2, Community Pharmacy Services, Vaccination  
30  
31  
32

33 12 Word count: 3,744  
34  
35  
36  
37  
38  
39  
40  
41  
42  
43  
44 16  
45  
46  
47 17  
48  
49  
50  
51  
52  
53  
54  
55  
56  
57  
58  
59  
60

## 18 Abstract

### 19 Introduction

20 Community pharmacists and their teams have remained accessible to the public providing essential  
21 services despite immense pressures during the COVID-19 pandemic. They have successfully  
22 expanded the influenza vaccination programme and are now supporting the delivery of the COVID-  
23 19 vaccination roll-out.

### 24 Aim

25 This rapid realist review aims to understand how community pharmacy can most effectively deliver  
26 essential and advanced services, with a focus on vaccination, during the pandemic and in the future.

### 27 Method

28 An embryonic programme theory was generated using four diverse and complementary documents  
29 along with the expertise of the project team. Academic databases, preprint services and grey  
30 literature were searched and screened for documents meeting our inclusion criteria. The data was  
31 extracted from 103 documents to develop and refine a programme theory using a realist logic of  
32 analysis. Our analysis generated 13 context-mechanism-outcome configurations explaining when,  
33 why and how community pharmacy can support public health vaccination campaigns, maintain  
34 essential services during pandemics, and capitalise on opportunities for expanded, sustainable public  
35 health service roles. The views of stakeholders including pharmacy users, pharmacists, pharmacy  
36 teams and other healthcare professionals were sought throughout to refine the 13 explanatory  
37 configurations.

### 38 Results

39 The 13 context-mechanism-outcome configurations are organised according to decision makers,  
40 community pharmacy teams and community pharmacy users as key actors. Review findings include:

1  
2  
3 41 supporting a clear role for community pharmacies in public health; clarifying pharmacists' legal and  
4  
5 42 professional liabilities; involving pharmacy teams in service specification design; providing suitable  
6  
7 43 guidance, adequate compensation and resources; and leveraging accessible, convenient locations of  
8  
9 44 community pharmacy.

## 12 45 Discussion

13  
14  
15 46 Community pharmacy has been able to offer key services during the pandemic. Decision makers  
16  
17 47 must endorse, articulate and support a clear public health role for community pharmacy. We  
18  
19 48 provide key recommendations for decision makers to optimise such a role during these  
20  
21 49 unprecedented times and in the future.

22  
23  
24  
25 50

## 27 51 Strengths and limitations of this study

28  
29  
30 52 A diverse group of professional and public stakeholders validated our findings from the literature.

31  
32  
33 53

34  
35 54 By using a realist approach, we were to use broad range of data, including grey literature.

36  
37  
38 55

39  
40 56 To enable us to develop recommendations in a timely manner the focus of the review was  
41  
42 57 deliberately narrow.

43  
44  
45 58

46  
47 59 The topic could have been informed by other sources of evidence in particular empirical interviews  
48  
49 60 with key stakeholder.

50  
51  
52 61

53  
54 62 COVID-19 vaccination is a rapidly evolving area and this research was based on the best available  
55  
56 63 evidence at the time.

57  
58  
59 64  
60

1  
2  
3  
4  
5  
6  
7  
8  
9  
10  
11  
12  
13  
14  
15  
16  
17  
18  
19  
20  
21  
22  
23  
24  
25  
26  
27  
28  
29  
30  
31  
32  
33  
34  
35  
36  
37  
38  
39  
40  
41  
42  
43  
44  
45  
46  
47  
48  
49  
50  
51  
52  
53  
54  
55  
56  
57  
58  
59  
60

65

For peer review only

## 66 Introduction

67

68 Community pharmacy teams have continued to provide essential services during the coronavirus  
69 disease 2019 (COVID-19) pandemic. They offer accessibility and medicines expertise to the public,  
70 even in challenging times.<sup>1 2 3</sup> However, COVID-19 creates extra workload demands, such as  
71 medication dispensing with increases of up to 33% in prescription numbers.<sup>4</sup> To cope with this  
72 demand community pharmacies have increased their opening hours and hired additional staff.<sup>4</sup>  
73 Alongside this additional workload, they have managed widening coverage of the influenza vaccines  
74 programme.<sup>5</sup>

75 Evidence suggests that community pharmacy can successfully provide diverse vaccination services  
76 including seasonal and pandemic influenza, travel vaccinations and hepatitis B for at-risk groups,  
77 within the provisions of the UK National Health Service (NHS) or privately.<sup>6</sup> They have successfully  
78 provided influenza vaccines as an NHS commissioned advanced service since 2015.<sup>5</sup> One service  
79 evaluation found that of 485 patients asked, 99% expressed confidence in their pharmacist to  
80 provide additional vaccinations.<sup>7</sup> Community pharmacy can also support influenza and other  
81 vaccinations to combat the significantly higher COVID-19 related mortality in the non-white  
82 community.<sup>8 9</sup>

83 The COVID-19 pandemic has stretched NHS capacity to safely and efficiently meet public health  
84 demands. A role for community pharmacy in the national vaccination service requires an  
85 understanding of what pharmacy teams require to successfully deliver essential and advanced  
86 services during the pandemic. Such knowledge is timely, given the roll-out of COVID-19 vaccines  
87 across the community.<sup>10</sup>

88 Delivering a vaccine is a complex process and successful delivery is context-dependent. A realist  
89 review helps make sense of complex situations<sup>11 12</sup>, such as how community pharmacy can most



1  
2  
3 90 effectively address the challenges presented by COVID-19. A rapid review can generate guidance for  
4  
5 91 decision makers to assist with roll-out of COVID-19 vaccinations to community pharmacy. This rapid  
6  
7 92 realist review aimed to understand how community pharmacy can most effectively deliver essential  
8  
9 93 and advanced services, with a focus on vaccination, during the pandemic and in the future.  
10  
11  
12

## 13 94 **Methods**

14  
15  
16 95 A rapid realist review of academic and other literature, supplemented by input from key actors, was  
17  
18 96 undertaken to understand how and when community pharmacy can effectively support the public  
19  
20 97 health agenda during pandemics such as COVID-19. Rapid reviews aim to ensure findings are  
21  
22 98 generated and disseminated in response to the urgent nature of the situation. To produce this  
23  
24 99 knowledge at pace, we truncated the following review processes:

- 25  
26 100 - Programme theory development was undertaken within 1 month with input from the  
27  
28 101 project team.
- 29  
30 102 - Searching was expedited using broad search terms and using a limited number of key data  
31  
32 103 sources.
- 33  
34 104 - Data analysis and context-mechanism-outcome configuration (CMOC) development  
35  
36 105 focussed on where the programme theory was considered most important during COVID-19.

37  
38 106 This realist review was undertaken within six-months (August 2020 - January 2021), the protocol was  
39  
40 107 published on PROSPERO<sup>13</sup> and, where relevant, follows the RAMESES quality and publication  
41  
42 108 standards.<sup>14</sup>  
43  
44

### 45 109 **Stage 1: Programme Theory Development**

46  
47 110 The project team met virtually to develop an embryonic programme theory using four diverse  
48  
49 111 documents from an initial search representing a professional journal<sup>15</sup>, a research journal<sup>16</sup>, a policy  
50  
51 112 document (Royal Pharmaceutical Society)<sup>17</sup> and a practical influenza briefing.<sup>18</sup> The team identified  
52  
53 113 the need for (i) enabling guidance for community pharmacy (to achieve legitimisation)<sup>16</sup>; (ii) practical

1  
2  
3 114 direction for community pharmacy practices (to ensure feasibility)<sup>15 16</sup>; and (iii) user assurance of  
4  
5 115 appropriate, safe, feasible and timely intervention (relative advantage).<sup>15</sup> The resultant embryonic  
6  
7 116 theory, patterned on a COM-B behavioural model of capability, opportunity, and motivation leading  
8  
9  
10 117 to behaviour<sup>19</sup>, was used to inform searching and initial analyses.  
11  
12

## 13 118 Stage 2: Literature Searching

14  
15  
16 119 Searches were conducted (July-August 2020) using MEDLINE, EMBASE, CINAHL, Web of Science, and  
17  
18 120 Scopus for search concepts relating to Pharmacy and COVID by AB (see Appendix 1 for search  
19  
20 121 strategy). Reference checking and citation searching of all included references on Google Scholar  
22  
23 122 (using the Publish or Perish tool) were also carried out. Given the novelty of the virus, we searched  
24  
25 123 the contents of preprint services and the World Health Organisation (WHO) COVID Register. Grey  
26  
27 124 literature searches included social media (e.g. blogs, facilitated Twitter® discussion [#Cpharmchat]),  
28  
29 125 community pharmacy websites, and emails from relevant regulators and professional organisations  
30  
31 126 (e.g., Royal Pharmaceutical Society [RPS], Pharmaceutical Services Negotiation Committee [PSNC],  
32  
33 127 General Pharmaceutical Council [GPhC]).  
34  
35  
36  
37 128 Key inclusion criteria were high or middle-income countries, community pharmacy and infectious  
38  
39 129 disease management (see Appendix 2). The search covered January 2003-July 2020 to include SARS,  
40  
41 130 a comparable condition first identified in 2003. There were no restrictions on study designs eligible  
42  
43  
44 131 for inclusion.  
45  
46

## 47 132 Stage 3: Data Selection and Extraction (selection and coding)

48  
49  
50 133 Selection and appraisal of documents followed a two-step procedure:

51  
52  
53 134 1). EY screened the title, abstract and keywords of potentially relevant documents against inclusion  
54  
55 135 criteria. A 10% random sample was checked by two research team members (AB and MM) for  
56  
57 136 consistency.  
58  
59  
60

1  
2  
3 137 2). EY obtained and screened full texts of all documents meeting the eligibility criteria.  
4  
5  
6 138 Relevant data from the included full text documents was coded into NVivo by EY, MM and JB. Some  
7  
8 139 codes came from the data (i.e. inductive coding); others were derived from the programme theory  
9  
10 140 (i.e. deductive coding) and some were derived using retroduction (i.e. by interpretation of what  
11  
12 141 might be functioning as mechanisms).<sup>20</sup> No assessment was made of the rigour of the data within  
13  
14 142 included documents, however global judgements were made of the quality of the explanations  
15  
16 143 provided by the CMOCs and programme theory using the criteria of consilience, simplicity and  
17  
18 144 analogy.<sup>21</sup>

#### 145 Stage 4: Data Synthesis

146 The data analysis/synthesis was conducted by EY, MM and JB with input from the rest of the project  
147 team to develop and refine the programme theory using a realist logic of analysis. Our analysis  
148 generated 13 realist CMOCs, explaining when, why and how community pharmacy can support  
149 public health vaccination campaigns, maintain essential services during pandemics, and capitalise on  
150 opportunities for expanded, sustainable public health service roles. Actor conversations generated  
151 further CMOCs related to care for diverse and vulnerable populations, including the Black and  
152 Minority Ethnic (BAME) community.

153 Our realist logic of analysis centred on the following questions:

- 154 • Interpretation of meaning: Do the contents coded by the team provide data that may be  
155 interpreted as CMOCs?
- 156 • Interpretations and judgements about CMOCs: How do the CMOCs relate to the programme  
157 theory?
- 158 • Interpretations and judgements about programme theory: How do the programme theory and  
159 its CMOCs correspond with key actor perspectives of reality?

1  
2  
3 160 Data to answer our questions was iteratively sought across documents. Interpretive cross-case  
4  
5 161 comparison was used to identify and to explain the “success” of pandemic community pharmacy  
6  
7 162 interventions delivered in different settings or to different population groups.  
8  
9

### 10 163 Key Stakeholders

11  
12  
13  
14 164 Key stakeholders, including community pharmacists and support staff (including representatives  
15  
16 165 from large and smaller chains, sole independent pharmacies and primary care), other healthcare  
17  
18 166 professionals and members of the public were consulted on four occasions. The meetings took place  
19  
20 167 over Microsoft Teams and each lasted about one hour.  
21  
22

### 23 168 Patient and Public Involvement

24  
25  
26 169 Members of the public were drawn from The University of Sheffield’s Patient and Public Involvement  
27  
28 170 database and contacts of the core project team. Groups numbered between 11 and 13 members,  
29  
30 171 with ages ranging from 22 to 74 years, from diverse locations and ethnicities including Black African,  
31  
32 172 Black Caribbean, British Asian, British Chinese, White Irish and White British. Collectively,  
33  
34 173 stakeholders provided feedback and advice on their real-world experience of working in or using  
35  
36 174 community pharmacy.  
37  
38  
39

40 175

### 41 42 43 176 Results

44  
45  
46 177

47  
48 178 103 documents were included in this rapid review and were coded to develop and refine our CMOCs  
49  
50 179 and programme theory (PRISMA diagram in Appendix 3). The final programme theory is summarised  
51  
52 180 in Appendix 4—from abstract visioning to actual patient uptake of the COVID-19 vaccine. Although  
53  
54 181 the programme theory is outlined in a linear fashion, steps within it are not necessarily linear and  
55  
56 182 may occur simultaneously. The CMOCs are organized according to key actors, or individuals and  
57  
58 183 groups with a vested interest in community pharmacy delivery of a COVID-19 vaccination  
59  
60

184 programme. “Actor” derives from sociology and is synonymous with “stakeholder”; we privileged  
 185 this term to differentiate programme theory/CMOC organization from project stakeholder  
 186 participants.<sup>22</sup> Table 1 briefly describes the three actor groups with their respective CMOCs and  
 187 corresponding steps in Appendix 4. Tables 2-4 show the final 13 CMOCs.

189 Table 1: Programme Theory Actors with corresponding CMOCs and steps

| Programme<br>Theory Actors                  | Description                                                                                                                                                                                                                                                                                                                                                         | CMOCs*       | Steps in Programme<br>Theory** |
|---------------------------------------------|---------------------------------------------------------------------------------------------------------------------------------------------------------------------------------------------------------------------------------------------------------------------------------------------------------------------------------------------------------------------|--------------|--------------------------------|
| Decision Makers                             | The UK government, regulatory and professional bodies, the public.                                                                                                                                                                                                                                                                                                  | CMOC 1 - 4   | Steps 1 - 4                    |
| Community<br>Pharmacists and<br>their Teams | Community pharmacists are health care professionals registered by the General Pharmaceutical Council and supported by teams made up of counter assistants, dispensers and registered technicians. They work in high street locations, in local communities and in supermarkets. Employers range from large chains to small individually owned community pharmacies. | CMOC 5 – 9   | Steps 5 – 7 and 9 – 11         |
| Pharmacy Users                              | Members of the public who use any community pharmacy services including prescription dispensing, minor ailment advice/treatment or vaccination services.                                                                                                                                                                                                            | CMOC 10 - 13 | Step 8                         |

190

191 \*see Table 2-4

192 \*\*See Appendix 4

193

194 The following sections summarise the CMOCs related to each of the three actor groups. Illustrative  
 195 examples of the supporting evidence from review documents are presented (Tables 2-4).

196

197 *Decision makers*

198 Decision maker and public endorsement (CMOC 1) are essential first steps in enlisting community  
 199 pharmacy for COVID-19 vaccination programmes. Regulators must ensure pharmacists have the  
 200 legal scope to do so (CMOC 2), with community pharmacy input during the development of policies  
 201 and protocols (CMOC 3), so that final service specifications are flexible and do-able within local  
 202 settings (CMOC 4).

203 Table 2 - Decision Makers (CMOCs 1-4)

|                                                                                                       |                                                                                                                                                                                                                                                                                                                                                                                                                                                                                                                                                                                                                                                                                                                                                                                                                                                                                                    |
|-------------------------------------------------------------------------------------------------------|----------------------------------------------------------------------------------------------------------------------------------------------------------------------------------------------------------------------------------------------------------------------------------------------------------------------------------------------------------------------------------------------------------------------------------------------------------------------------------------------------------------------------------------------------------------------------------------------------------------------------------------------------------------------------------------------------------------------------------------------------------------------------------------------------------------------------------------------------------------------------------------------------|
| <p><b>CMOC 1 – Support a public health role<sup>23 24 25</sup></b><br/><br/> <small>26-32</small></p> | <p><b>When the government, pharmacy regulators, professional bodies and the public endorse and support a clear role for community pharmacy in public health services (C), community pharmacists will be more likely to adopt vaccination services (O) because they see it as their professional role and duty (M).</b></p> <p><i>“Distribution and administration of the COVID-19 vaccination programme will require concerted action across the NHS. With unique insight and expertise in medicines and the delivery of vaccination programmes, pharmacists have a clear role in contributing to the success of this programme.” (Great Britain)<sup>24</sup></i></p> <p><i>“55% of the public have visited a pharmacy during the COVID19 crisis...89% of people believe pharmacies are playing an essential role in the COVID19 crisis.” (UK National Pharmacy Association)<sup>23</sup></i></p> |
|-------------------------------------------------------------------------------------------------------|----------------------------------------------------------------------------------------------------------------------------------------------------------------------------------------------------------------------------------------------------------------------------------------------------------------------------------------------------------------------------------------------------------------------------------------------------------------------------------------------------------------------------------------------------------------------------------------------------------------------------------------------------------------------------------------------------------------------------------------------------------------------------------------------------------------------------------------------------------------------------------------------------|

|                                                                                        |                                                                                                                                                                                                                                                                                                                                                                                                                                                                                                                                                                                                                                                                                                                                                                                                                                                                                                                                                           |
|----------------------------------------------------------------------------------------|-----------------------------------------------------------------------------------------------------------------------------------------------------------------------------------------------------------------------------------------------------------------------------------------------------------------------------------------------------------------------------------------------------------------------------------------------------------------------------------------------------------------------------------------------------------------------------------------------------------------------------------------------------------------------------------------------------------------------------------------------------------------------------------------------------------------------------------------------------------------------------------------------------------------------------------------------------------|
|                                                                                        | <p><i>“Pharmacists...have been called on to coordinate the administration of COVID-19 tests...providing ongoing COVID-19 surveillance to communities by allowing walk-in testing at community pharmacies...[This] might be more sustainable and convenient than the large-scale public screening being done as of the summer of 2020.” (USA)<sup>25</sup></i></p> <p><i>“Given the past success of community pharmacists with increasing annual seasonal influenza uptake and their accessibility, pharmacists will need to be central in administering COVID-19 vaccines in order to achieve rapid population-wide coverage.” (Canada)<sup>26</sup></i></p>                                                                                                                                                                                                                                                                                              |
| <p><b>CMOC 2 –Clarify legal and professional liabilities<sup>24 31 33-40</sup></b></p> | <p><b>When pharmacy regulators and the NHS clarify community pharmacists’ legal and professional liabilities arising from the administration of a novel and potentially unlicensed COVID-19 vaccine (C), community pharmacists are more willing to give the vaccination (O) because they feel reassured regarding liability (M).</b></p> <p><i>“The role of pharmacists in the COVID-19 vaccination programme must be made clear to the pharmacy profession itself. Professional and representative pharmacy bodies have an important role to play in providing the right level of information to the profession to support their roles in the vaccination programme.” (Great Britain)<sup>24</sup></i></p> <p><i>“Indemnity insurance for individual healthcare professionals needs to be amended to cover this activity and be state-funded. There also needs to be clear communication to healthcare professionals, so they clearly understand</i></p> |

|                                                                                                     |                                                                                                                                                                                                                                                                                                                                                                                                                                                                                                                                                                                                 |
|-----------------------------------------------------------------------------------------------------|-------------------------------------------------------------------------------------------------------------------------------------------------------------------------------------------------------------------------------------------------------------------------------------------------------------------------------------------------------------------------------------------------------------------------------------------------------------------------------------------------------------------------------------------------------------------------------------------------|
|                                                                                                     | <i>that they are covered and under which circumstances this applies.” (Great Britain)<sup>41</sup></i>                                                                                                                                                                                                                                                                                                                                                                                                                                                                                          |
| <b>CMOC 3 – Co-develop feasible service specifications<sup>1 38</sup></b><br><br><i>42-48</i>       | <b>When COVID-19 vaccination policy and service specifications have been developed with input from diverse community pharmacists and staff tasked with administering and supporting the administration of the vaccine (C), community pharmacies are more likely to deliver the service (O) because they believe the service specification is feasible (M).</b><br><br><i>“Pharmacists ideally want input into future policy changes before they are finalized, so that these can reflect capacity and preparedness on the ground and be publicized accurately.” (Great Britain)<sup>1</sup></i> |
| <b>CMOC 4 – Issue clear, relevant and timely guidance<sup>25 27 31 34</sup></b><br><br><i>48-62</i> | <b>When government, pharmacy regulators and professional bodies provide consistent, clear, relevant, and timely guidance for the delivery of the COVID-19 vaccines (C), community pharmacies are more likely to deliver the service (O), because the guidance is helpful and simplifies implementation (M).</b><br><br><i>“... it is good to see that NHSE/I have provided the information we have been waiting for to review the resources we have nationwide and decide how we can bring them to bear to help the NHS defeat this virus.” (Great Britain)<sup>49</sup></i>                    |

204

205

In England community pharmacies have government contracts and partnerships to deliver

206

vaccinations and other essential services during emergencies, including the COVID-19 pandemic.<sup>25 31</sup>

207

<sup>32</sup> Pharmacies in the USA and Canada have also been identified as having a substantive role in

208

vaccine administration (CMOC1).<sup>25,26</sup> The idea of harnessing UK community pharmacy capacity

209

enjoys widespread public support (CMOC2).<sup>23</sup> However, appropriate service delivery is hampered by

210

unfeasible operational conditions (CMOC3)<sup>1</sup>; for example, medication deliveries are funded by the

211

UK government for “vulnerable people”, but this category of service users is defined narrowly by the



212 government and misunderstood by the public, creating unrealistic expectations of community  
 213 pharmacy and generating additional work.<sup>1</sup>  
 214 In contrast, when clear options for community pharmacy involvement in COVID-19 vaccination  
 215 programmes were issued through the NHS (CMOC4), the chief executive of the Association of  
 216 Independent Multiple Pharmacies commented positively on members' engagement in delivering  
 217 vaccines.<sup>49</sup>

### 218 *Community Pharmacists and Team*

219 Community pharmacies have had to manage ongoing essential services, in addition to supporting  
 220 COVID vaccination delivery during the pandemic (CMOC6), including delivery of necessary  
 221 medications (CMOC7). Given fears and anxieties related to COVID-19 and changes to service  
 222 delivery, community pharmacies have had to deal with inappropriate behaviours from the public,  
 223 including emotional abuse and threats of physical abuse (CMOC8). As an integral public health  
 224 service, community pharmacy capacity to meet NHS needs will be enhanced through use of IT and  
 225 collaboration with other service providers (CMOC9).

226 Table 3 - Community Pharmacists and Team (CMOCs 5-9)

|                                                                               |                                                                                                                                                                                                                                                                                                         |
|-------------------------------------------------------------------------------|---------------------------------------------------------------------------------------------------------------------------------------------------------------------------------------------------------------------------------------------------------------------------------------------------------|
| <b>CMOC 5 – Receive adequate compensation and resources<sup>1 63-77</sup></b> | <b>When community pharmacies receive adequate compensation and resource support for COVID-19 vaccines (C), they are more likely to deliver the service (O), because they feel recognised for their service contributions (M).</b>                                                                       |
|                                                                               | <i>“Pharmacists...have been incredible in supporting patients throughout COVID-19 and rightly deserve recognition for the work they do. We know that teams were already under pressure and that colleagues in community pharmacy are feeling added financial strain.” (Great Britain).<sup>63</sup></i> |

|                                                                                                                 |                                                                                                                                                                                                                                                                                                                                                                                                                                                                                                                                                                                                                                     |
|-----------------------------------------------------------------------------------------------------------------|-------------------------------------------------------------------------------------------------------------------------------------------------------------------------------------------------------------------------------------------------------------------------------------------------------------------------------------------------------------------------------------------------------------------------------------------------------------------------------------------------------------------------------------------------------------------------------------------------------------------------------------|
|                                                                                                                 | <p><i>“In the community, mitigating the impact of COVID-19 has...focused largely on general practitioners (GPs). This is unsurprising to those in the pharmacy profession who have long considered policy makers to overlook them.” (Great Britain)<sup>1</sup></i></p>                                                                                                                                                                                                                                                                                                                                                             |
| <p><b>CMOC 6 – Sustain capacity and facility to adapt essential services</b><sup>16 17 30 34 68 70 71</sup></p> | <p><b>When a community pharmacy has the capacity and permission to manage and adapt existing essential services during COVID-19 (C), they are more likely to effectively deliver and sustain these services (O) because it’s feasible for them to do so (M).</b></p>                                                                                                                                                                                                                                                                                                                                                                |
| <p>78-91 92</p>                                                                                                 | <p><i>“Virtual and telephone consultations have become commonplace, particularly to vulnerable patients. Pharmacists have implemented systems to dispense medications in advance of need to minimise wait times and duplicate visits. In case-by-case examples...there has been anticipatory management of medication-related needs.” (Ireland)<sup>92</sup></i></p> <p><i>“Pharmacists who had comfort and confidence in managing electronic communication reported feeling greater control over workflow and the ability to triage and queue patients more effectively based on priority and need.” (Canada)<sup>60</sup></i></p> |
| <p><b>CMOC 7 – Inform users of essential service availability/continuity</b></p>                                | <p><b>When community pharmacies have processes in place to inform pharmacy users about the availability of essential services (C), pharmacy users are less likely to become anxious (O), because they feel reassured about access to what they need (M).</b></p>                                                                                                                                                                                                                                                                                                                                                                    |

|                                                                                                    |                                                                                                                                                                                                                                                                                                                                                                                                                                                                                                                                                                                                                                                                                                                                                                                                                                                                                                                                                                                                                                                                                                                                                                                                                                                                                                                                        |
|----------------------------------------------------------------------------------------------------|----------------------------------------------------------------------------------------------------------------------------------------------------------------------------------------------------------------------------------------------------------------------------------------------------------------------------------------------------------------------------------------------------------------------------------------------------------------------------------------------------------------------------------------------------------------------------------------------------------------------------------------------------------------------------------------------------------------------------------------------------------------------------------------------------------------------------------------------------------------------------------------------------------------------------------------------------------------------------------------------------------------------------------------------------------------------------------------------------------------------------------------------------------------------------------------------------------------------------------------------------------------------------------------------------------------------------------------|
| <p>92 16 28 31 32 51 60 65 71 80 81</p> <p>85 93-101</p>                                           | <p><i>“Access to medications is a main concern expressed by our patients... The CDC and SAMHSA offer guidance on ways to reduce stress and anxiety in this time of uncertainty.”<sup>95</sup></i></p> <p><i>“As a result of the power dynamics at play, it is ultimately up to pharmacists to be able to reassure patients and provide care, all while taking into account their mental health. Currently, guidelines regarding patient interaction during a pandemic are needed”.<sup>51</sup></i></p> <p><i>“In addition, there is ongoing work in liaison with pharmacists, general practitioners, and state and territory authorities to enable therapeutic substitution by pharmacists in the event of a shortage. This will allow community pharmacists to substitute dose strength or form without prior approval from the prescriber, if a prescribed medicine is not available at the time of dispensing. These measures highlight the important role pharmacists can play in enabling and maintaining access to medicines for people in need throughout the COVID-19 outbreak.” (Australia)<sup>85</sup></i></p> <p><i>“Access to medications is a main concern expressed by our patients... The CDC and SAMHSA offer guidance on ways to reduce stress and anxiety in this time of uncertainty.” (USA)<sup>95</sup></i></p> |
| <p><b>CMOC 8 – Protect the health and safety of staff</b> <sup>24 31 51 71 77 81 102-108</sup></p> | <p><b>When community pharmacies have the means to protect the health of pharmacists and staff (C), they are more likely to deliver essential services and COVID-19 vaccination services (O), because they feel safe to do so (M).</b></p>                                                                                                                                                                                                                                                                                                                                                                                                                                                                                                                                                                                                                                                                                                                                                                                                                                                                                                                                                                                                                                                                                              |

1  
2  
3  
4  
5  
6  
7  
8  
9  
10  
11  
12  
13  
14  
15  
16  
17  
18  
19  
20  
21  
22  
23  
24  
25  
26  
27  
28  
29  
30  
31  
32  
33  
34  
35  
36  
37  
38  
39  
40  
41  
42  
43  
44  
45  
46  
47  
48  
49  
50  
51  
52  
53  
54  
55  
56  
57  
58  
59  
60

|                                                                                                                                         |                                                                                                                                                                                                                                                                                                                                                                                                                                                                                                                                                                                                                                                                                                                                                                                                                                                                                                                                                                                                                                                                                                                                         |
|-----------------------------------------------------------------------------------------------------------------------------------------|-----------------------------------------------------------------------------------------------------------------------------------------------------------------------------------------------------------------------------------------------------------------------------------------------------------------------------------------------------------------------------------------------------------------------------------------------------------------------------------------------------------------------------------------------------------------------------------------------------------------------------------------------------------------------------------------------------------------------------------------------------------------------------------------------------------------------------------------------------------------------------------------------------------------------------------------------------------------------------------------------------------------------------------------------------------------------------------------------------------------------------------------|
|                                                                                                                                         | <p><i>“...Given high levels of public anxiety and uncertainty regarding the integrity of the drug supply chain in Canada, many participants reported difficult, sometimes frightening, interactions with members of the public and their desire for dedicated security to provide support and conflict management” (Canada).<sup>31</sup></i></p> <p><i>“An additional burden Asian pharmacists face, on top of pharmacist harassment, is the rise of anti-Asian racism that has come about due to COVID-19. Verbal and even physical abuse has been reported to happen in various countries, such as the UK, France, and the USA, to those of Chinese descent...” (UK, France, USA)<sup>51</sup></i></p> <p><i>“The survey found that although more than a third (37%) of pharmacists said they felt unsafe at some point working during the pandemic, concerns over PPE have eased. This is due, in part, to the supply problems being eased and community pharmacists being finally allowed to order from the national online PPE portal in an emergency, after calls for access from the RPS.” (Great Britain)<sup>77</sup></i></p> |
| <p><b>CMOC 9 – Enhance collaboration across services, including IT<sup>18</sup></b><br/><br/><i>26 47 56 57 69 78 80 85 109-114</i></p> | <p><b>When systems needed for COVID-19 vaccination, including IT and remuneration, support collaboration by various service providers (e.g. general practitioner surgeries and community pharmacies: (C), a coordinated response is more likely (O), because reduced effort is needed from everyone (M).</b></p>                                                                                                                                                                                                                                                                                                                                                                                                                                                                                                                                                                                                                                                                                                                                                                                                                        |

1  
2  
3  
4  
5  
6  
7  
8  
9  
10  
11  
12  
13  
14  
15  
16  
17  
18  
19  
20  
21  
22  
23  
24  
25  
26  
27  
28  
29  
30  
31  
32  
33  
34

*“Planning and delivery should be undertaken across a consistent, pre-agreed footprint. It may be more efficient and cost effective to provide immunisation across a number of providers, pooling resources and sites to deliver the best service possible, and working in coordination with other local stakeholders such as directors of public health and local government.” (Great Britain)<sup>47</sup>*

*“For many community pharmacists, a lack of connected IT is a huge problem. Kieran Eason, who runs an independent pharmacy in Tamworth, Staffordshire, says lack of intra-operability makes it more difficult to do relatively simple things, like sending prescription requests to GPs. “Pharmacy IT is just a complete disaster,” he says, suggesting the COVID-19 crisis has highlighted flaws, such as the number of different systems pharmacists use.” (Great Britain)<sup>69</sup>*

227

35  
36  
37  
38  
39  
40  
41  
42  
43  
44  
45  
46

228 Although attention is focused on a COVID-19 vaccine, community pharmacies offer diverse essential  
229 services. In the UK and other high-income countries, community pharmacy services also provide  
230 advanced services such as vaccinations.<sup>115</sup> Pharmacists consider it a professional responsibility to  
231 provide essential services during the pandemic, despite clear financial risks to themselves.<sup>63</sup>

47  
48  
49  
50  
51  
52  
53  
54  
55  
56  
57  
58  
59  
60

232 Despite pharmacists’ professional and moral obligations to provide essential services, ongoing  
233 persistent ‘under-recognition’ can jeopardize their ability to contribute to COVID-19 vaccinations  
234 (CMOC5) as well as maintain a usual service. Under-recognition has been an issue in previous UK  
235 vaccination campaigns; respondents to a survey of Welsh community pharmacists after the 2016  
236 influenza season described providing a “mop up” service for general practitioners (GPs).<sup>59 68</sup>

1  
2  
3 237 Multiple required community pharmacy service adaptations have been reported by the UK  
4  
5 238 Pharmaceutical Journal, including changeover in retail space to medication preparation and  
6  
7 239 dispensing, and call-in shopping services for other retail items (CMOC6). Service adaptations have  
8  
9 240 been affected by hours of operation, available staff, and cancellations of contracted services, such as  
10  
11 241 blood pressure testing and smoking cessation support—all with financial implications for  
12  
13 242 pharmacists.<sup>80</sup>

14  
15  
16  
17 243 Before COVID-19, community pharmacies globally were offering “valued-added services” (VAS) such  
18  
19 244 as drive-thru services, online ordering and communications services (e.g., prescription reminders) to  
20  
21 245 stay competitive. Many VAS services have helped pharmacies adapt more quickly to pandemic  
22  
23 246 restrictions.<sup>81</sup>

24  
25  
26  
27 247 During the pandemic, ensuring access to needed medications has been a critical pharmacy service,  
28  
29 248 to allay public concerns (CMOC7).<sup>16</sup> Potential and actual disruptions in expected services and needed  
30  
31 249 supplies (e.g., medications) have resulted in tensions, threats and verbal/physical abuse by the  
32  
33 250 public to community pharmacists (CMOC 8).<sup>51 80 116</sup> Safety policies, protocols and safety-related  
34  
35 251 supplies (e.g., PPEs) must in place to ensure community pharmacy teams’ safety.<sup>80</sup>

36  
37  
38  
39 252 The UK COVID-19 vaccination campaign borrows heavily from previous, successful collaborative  
40  
41 253 influenza vaccination programmes using community pharmacy and GPs (CMOC9).<sup>48</sup> Pooling  
42  
43 254 resources improves service delivery.<sup>117</sup> For example, the UK Pharmaceutical Journal reported how a  
44  
45 255 greater collaborative approach has resulted in successful influenza vaccination of home care staff  
46  
47 256 and domiciliary workers during the pandemic.<sup>117</sup>

48  
49  
50 257 The pandemic has clearly demonstrated the importance of interoperable, connected IT systems  
51  
52 258 across services.<sup>118</sup> Getting access to reliable information is important for tracking supplies and  
53  
54 259 deliveries related to the COVID-19 vaccination programme.<sup>69</sup> A pandemic silver lining is raised  
55  
56 260 awareness of IT functions for enhanced delivery of essential services (e.g., medication planning,  
57  
58  
59  
60

1  
2  
3 261 prescribing and dispensing between pharmacies and GPs) and advanced services, including  
4  
5 262 vaccinations.<sup>69</sup>  
6  
7

8  
9 263 *Pharmacy Users*

10  
11 264 Pharmacy users trust community pharmacies as a reliable source of information (CMOC10) about  
12  
13 265 vaccines, and pharmacies' local accessibility and convenience increases the likelihood of users  
14  
15 266 obtaining COVID-19 vaccines through them (CMOC11). Community pharmacy relationships with  
16  
17 267 vulnerable populations in their local settings may enhance uptake of the vaccine by these groups  
18  
19 268 (CMOC12). Provision for privacy is an important user consideration. Pharmacy users expect private  
20  
21 269 consultations to preserve their confidentiality (CMOC13).  
22  
23  
24  
25 270  
26  
27  
28  
29  
30  
31  
32  
33  
34  
35  
36  
37  
38  
39  
40  
41  
42  
43  
44  
45  
46  
47  
48  
49  
50  
51  
52  
53  
54  
55  
56  
57  
58  
59  
60

271 Table 4 - Pharmacy Users (CMOCs 10-13)

272

|                                                                                                                                        |                                                                                                                                                                                                                                                                                                                                                                                                                                                                                                                                                                                                                                                                                                                                                                                                                              |
|----------------------------------------------------------------------------------------------------------------------------------------|------------------------------------------------------------------------------------------------------------------------------------------------------------------------------------------------------------------------------------------------------------------------------------------------------------------------------------------------------------------------------------------------------------------------------------------------------------------------------------------------------------------------------------------------------------------------------------------------------------------------------------------------------------------------------------------------------------------------------------------------------------------------------------------------------------------------------|
| <p><b>COMC 10 – Trust the pharmacist as reliable information source</b><sup>32 53 119-122</sup></p>                                    | <p><b>When pharmacy users receive information about the COVID-19 vaccine from their community pharmacy (C), they are more likely to get the vaccine (O), because they trust community pharmacy as a source of reliable, accurate information (M).</b></p> <p><i>“When patients were educated about influenza, herpes zoster, and pneumococcal vaccines as a result of a pharmacist-driven intervention in community pharmacies, they were influenced to receive the vaccination.” (USA)<sup>119</sup></i></p> <p><i>“Being able to address the public enquiries with accurate up-to-date information about the local situation and the overall infection progress is the key to build trustful relationship with them at troubled times.” (Macau)<sup>32</sup></i></p>                                                       |
| <p><b>CMOC 11 – Trust the pharmacist to deliver responsive services</b><sup>7 18 23 26 34 37 43 51 54 59 63 70 84 85 123-135</sup></p> | <p><b>When community pharmacies are trusted to make necessary service adaptations to ensure services are flexible, convenient and accessible (C), COVID-19 vaccine uptake is likely to be higher among pharmacy users (O) because the service is responsive to local needs (M).</b></p> <p><i>“Pharmacists have always been the most accessible health care provider; this is especially true in the era of COVID-19.... While other professionals have closed their doors to patients, community pharmacies remained open to the public despite stricter lockdown restrictions. As highly trusted healthcare clinicians, community pharmacists play a vital role in closing the gaps that are exacerbated by the additional strain on the system and reduced access to healthcare providers.” (Canada)<sup>51</sup></i></p> |



|                                                                                                                  |                                                                                                                                                                                                                                                                                                                                                                                                                                                                                                                                                                                                                                                                                                                                                                                                                                                                                                                                                                                                                                                                                                                                                                                                   |
|------------------------------------------------------------------------------------------------------------------|---------------------------------------------------------------------------------------------------------------------------------------------------------------------------------------------------------------------------------------------------------------------------------------------------------------------------------------------------------------------------------------------------------------------------------------------------------------------------------------------------------------------------------------------------------------------------------------------------------------------------------------------------------------------------------------------------------------------------------------------------------------------------------------------------------------------------------------------------------------------------------------------------------------------------------------------------------------------------------------------------------------------------------------------------------------------------------------------------------------------------------------------------------------------------------------------------|
|                                                                                                                  | <p><i>“Pharmacy flu vaccination services complement those provided by general practitioners to help improve overall coverage and vaccination rates for patients in at-risk groups. These services are highly accessed by patients from all socio demographic areas, and seem to be particularly attractive to carers, frontline healthcare workers, and those of working age.” (Great Britain)<sup>135</sup></i></p>                                                                                                                                                                                                                                                                                                                                                                                                                                                                                                                                                                                                                                                                                                                                                                              |
| <p><b>CMOC 12 –</b></p> <p><b>Access culturally-sensitive services</b></p> <p><small>27 78 80 92 136</small></p> | <p><b>When community pharmacies leverage their community location and community-staff relationships (C), vulnerable populations, such as Black, Asian and Minority Ethnic groups are more likely to use their services, including COVID-19 vaccination services (O), because they trust their local community pharmacies to provide culturally sensitive service. (M)</b></p> <p>“Research continues to highlight that patients who are medically underserved have poorer inequitable access to health care due to them experiencing greater physical barriers to accessibility, encountering poorer patient-professional communication and are significantly disadvantaged where a service is not tailored to their unique needs or preferences.” (Great Britain)<sup>137</sup></p> <p><i>“I think over the years what’s happened is nationally it’s almost like everything has to be the same, which then doesn’t work because it doesn’t accommodate all the little variations...So we need to go back and in each individual pharmacy, gear it towards the population that it is meant to be meeting the needs of” (Pharmacist caring for BAME community-Great Britain)<sup>137</sup></i></p> |

|                                                                                                                      |                                                                                                                                                                                                                                                                                                                                                                                                                                                                                                                                                                                                                                                                                                                                        |
|----------------------------------------------------------------------------------------------------------------------|----------------------------------------------------------------------------------------------------------------------------------------------------------------------------------------------------------------------------------------------------------------------------------------------------------------------------------------------------------------------------------------------------------------------------------------------------------------------------------------------------------------------------------------------------------------------------------------------------------------------------------------------------------------------------------------------------------------------------------------|
| <p><b>CMOC 13 –</b></p> <p><b>Receive private and confidential services<sup>7 50 65 129</sup></b></p> <p>138-140</p> | <p><b>When community pharmacies make provisions for privacy (C), pharmacy users are more likely to use their services (O), because they are reassured about confidentiality (M).</b></p> <p><i>“If there was something not right...the first thing I would do is make an appointment with a doctor. I wouldn’t do and talk to somebody over a pharmacy counter.” (Great Britain)<sup>65</sup></i></p> <p><i>“Privacy, confidentiality and dignity are all vital elements of a trusting relationship between healthcare professionals and their patients.... In terms of privacy, the quality was perceived by the participants to include a confidential room that enabled private consultations.” (Great Britain)<sup>7</sup></i></p> |
|----------------------------------------------------------------------------------------------------------------------|----------------------------------------------------------------------------------------------------------------------------------------------------------------------------------------------------------------------------------------------------------------------------------------------------------------------------------------------------------------------------------------------------------------------------------------------------------------------------------------------------------------------------------------------------------------------------------------------------------------------------------------------------------------------------------------------------------------------------------------|

273

274 Public trust in community pharmacists is high—similar to doctors and nurses.<sup>38</sup> Trust between  
 275 pharmacists and users can be leveraged to overcome scepticism about the COVID-19 vaccine.  
 276 Providing reliable information about the disease and the vaccine, as pharmacies have done with  
 277 other infections, can enhance public uptake of the COVID-19 vaccine.<sup>113</sup> In the USA, 90% of the US  
 278 population lives within 5 miles of a community pharmacy. Given their convenience and accessibility,  
 279 consumers have visited their community pharmacists 12 times more frequently than their GPs.<sup>21</sup> A  
 280 UK study found that consumers who were eligible for a free influenza vaccine through their GPs  
 281 were willing to pay for pharmacy service because of convenience and ease of access.<sup>127</sup> Established,  
 282 trusting relationships are especially important for providing culturally sensitive services to  
 283 marginalized and vulnerable communities.<sup>129</sup> Community pharmacists, often members of local  
 284 communities are specially positioned to understand the culturally contextual factors that impact  
 285 their pharmacy users.<sup>89</sup> Trusting relationships are founded on privacy, confidentiality and dignity,

1  
2  
3 286 and COVID-19, public health protocols and limited space must be considered—in order to maintain  
4  
5 287 vital trust among pharmacy users.<sup>65</sup>  
6  
7

## 8 288 Discussion

9  
10  
11  
12 289 This realist review sought to understand how community pharmacy can contribute to the public  
13  
14 290 health agenda during the COVID-19 pandemic, particularly continuation of essential services and  
15  
16 291 engagement in vaccination services.<sup>115</sup> As the COVID-19 vaccination service continues to evolve, our  
17  
18 292 recommendations for decision makers highlight opportunities for community pharmacy to promote  
19  
20 293 safe, efficient and effective service delivery.  
21  
22

23 294

## 26 295 Summary of key Findings

28  
29 296 To optimise community pharmacy service during the pandemic, decision makers must endorse and  
30  
31 297 articulate a clear role for these healthcare professionals. The public already endorses advanced roles  
32  
33 298 for community pharmacy (e.g., vaccinations, minor ailment scheme), but public awareness depends  
34  
35 299 on what decision makers do and say. Practical decision maker measures include adequate  
36  
37 300 reimbursement to help cover the cost for time, staff and PPE (particularly for a sustainable long-term  
38  
39 301 service); legal (including indemnity), regulatory coverage for advanced roles; and clear and  
40  
41 302 consistent guidance for vaccination preparation and for adaptation of essential services. When given  
42  
43 303 the opportunity, the permissions and resources to do so, community pharmacies have been able to  
44  
45 304 adapt quickly to continue essential services and whenever possible, to offer critical advanced  
46  
47 305 services. Historically, community pharmacies have significantly increased vaccination uptake (e.g.,  
48  
49 306 influenza vaccinations) given their accessibility and convenience and capacity to adapt to local needs  
50  
51 307 for the general population and marginalized groups (e.g., BAME).  
52  
53  
54  
55

56 308  
57  
58  
59  
60

1  
2  
3  
4 309 Compare to other similar or related studies discussing important differences in  
5  
6  
7 310 results  
8  
9

10 311 At the time of this realist review, there were no similar reviews on community pharmacy roles with  
11  
12 312 respect to COVID-19 vaccinations. COVID-19 represents an unprecedented situation with limited  
13  
14 313 direct evidence to guide decision-making. However, realist approaches engage with a wider evidence  
15  
16 314 base, including research on past pandemics (e.g., SARS)<sup>60 141 142</sup>, mass vaccination campaigns (e.g.,  
17  
18 315 influenza)<sup>143</sup>, and community pharmacies' capacity pre-COVID-19 to deliver essential and advanced  
19  
20 316 services.<sup>19 144 145</sup> Key factors previously include a lack of leadership, a lack of guidance and an  
21  
22 317 increasing reliance on professional judgement and experience.<sup>60</sup> Research from the UK and other  
23  
24 318 economically developed countries supports the 13 CMOCs and decision maker recommendations in  
25  
26 319 this review (see tables 2-4 and table 5). However, limitations continue to surround the direct policy  
27  
28 320 relevance of much of the community pharmacy evidence base.<sup>146</sup>  
29  
30  
31  
32  
33

34  
35 322 Study strengths and limitations  
36  
37

38 323 The realist approach uses diverse data, including grey literature. This feature is especially important  
39  
40 324 given a novel and rapidly evolving topic area, such as COVID-19. Multiple researchers with subject  
41  
42 325 matter expertise participated in screening the literature and extracting and coding data, which  
43  
44 326 maximised opportunities to discuss and debate the plausibility of the inferences made. The CMOCs  
45  
46 327 were developed and refined through regular discussions within a team with varied academic and  
47  
48 328 clinical backgrounds. Professional and public stakeholder consultation further refined the CMOCs.  
49  
50  
51  
52 329 All rapid reviews operationalise coverage versus expediency. Other sources of evidence could have  
53  
54 330 informed the review; however, potential gaps were mitigated by stakeholder engagement and  
55  
56 331 expertise within the team. The evidence supporting the CMOCs was based on available time for  
57  
58 332 document review, and during the review period, research, directives and policy related to COVID-19  
59  
60

1  
2  
3 333 vaccination rapidly evolved. The programme theory and its CMOCs, however, are expressed in such  
4  
5 334 a way that they can be further confirmed, refuted or refined in the future using additional data.  
6  
7  
8 335 For this rapid review, given our short timeline of six months, we initially decided to focus on  
9  
10 336 community pharmacy roles and pandemic response in middle to high-income countries. Whilst we  
11  
12 337 identified data from higher-income countries such as Canada, USA, Australia and France, there was  
13  
14 338 very little published from middle-income countries. As such, it is likely that our findings and  
15  
16 339 recommendations are most applicable to high-income countries, although, the lessons learned from  
17  
18 340 high-income countries can serve as an initial reference point for best practice for other countries.  
19  
20 341 The recommendations are "how to's" for other countries to consider within their own cultural and  
21  
22 342 healthcare settings.  
23  
24  
25  
26  
27 343  
28  
29  
30 344 **Meaning of the study: possible explanations and implications for decision makers**  
31  
32  
33 345 Although there are multiple actors involved in pandemic response, for brevity, recommendations  
34  
35 346 (Table 5) are directed towards decision makers who possess the formal authority to implement the  
36  
37 347 recommendations.  
38  
39  
40 348  
41  
42 349 Table 5 - Recommendations for Decision Makers to Increase Community Pharmacy Engagement in  
43  
44 350 Pandemic Response (for further details check: <https://www2.aston.ac.uk/lhs/research/periscope>).  
45  
46  
47

| Recommendations                                                                                              | Derived from CMOC |
|--------------------------------------------------------------------------------------------------------------|-------------------|
| Articulate a clear public health agenda role for community pharmacy (e.g., COVID-19 testing and vaccination) | 1                 |

|                                           |                                                                                                                                                             |   |
|-------------------------------------------|-------------------------------------------------------------------------------------------------------------------------------------------------------------|---|
| 1<br>2<br>3<br>4<br>5<br>6<br>7<br>8<br>9 | Ensure pharmacy regulations for advanced roles, such as novel vaccine administration, are in place to legally protect community pharmacists and their teams | 2 |
| 10<br>11                                  | Involve local community pharmacies in policy and service specification development                                                                          | 3 |
| 12<br>13<br>14<br>15                      | Provide timely guidance with sufficient details for community pharmacies to quickly adapt to local needs                                                    | 4 |
| 16<br>17<br>18<br>19<br>20                | Provide adequate funding and reimbursement for community pharmacy services to deliver COVID-19 vaccines                                                     | 5 |
| 21<br>22<br>23<br>24<br>25                | Equip community pharmacies with the necessary permissions to manage and adapt essential services                                                            | 6 |
| 26<br>27<br>28<br>29                      | Ensure community pharmacies have the means to adequately protect the health of themselves, their staff and pharmacy users                                   | 8 |
| 30<br>31<br>32<br>33<br>34                | Facilitate collaboration and coordination of COVID-19 vaccination services across providers (e.g., GPs, community pharmacies) and systems (e.g., IT)        | 9 |

351

352 As the CMOCs were refined, 'tensions' were uncovered with implications for decision makers,

353 particularly: community pharmacists as healthcare professionals versus retailers<sup>43 106 145 147</sup>;

354 community pharmacies' capacity to remain financially viable while managing essential and advanced

355 services.<sup>19 148 149</sup> and; pharmacists' capacity to provide off-site services while maintaining physical

356 premises.<sup>150</sup> These tensions stem from lack of awareness of community pharmacists as healthcare

357 professionals.

358

359 Along the continuum of healthcare from community to hospital, community pharmacy is often the

360 first point of contact for the public. Community pharmacies contribute to primary care services

361 through essential services (e.g., medication dispensing) and expanded roles (e.g., vaccinations),<sup>115 147</sup>

362 often decreasing workload pressures on other providers, such as GPs.<sup>151</sup> Public surveys demonstrate

1  
2  
3 363 high levels of satisfaction with community pharmacy services, and vaccination uptake is increased  
4  
5 364 when pharmacies deliver these services.<sup>149</sup> Nevertheless, lack of public and decision maker  
6  
7 365 awareness of community pharmacy primary care roles has slowed uptake and integration of these  
8  
9 366 services.<sup>121</sup> A recent UK public survey found that community pharmacies are seen as “a medicine  
10  
11 367 supply shop by 48.3% of people, as a place to purchase medicines by 22%, and a place to purchase  
12  
13 368 non-medicinal products by 17.7%.”<sup>28</sup>  
14  
15  
16 369  
17  
18 370 In Ireland and Canada community pharmacies are an integral part of national vaccination  
19  
20 371 campaigns.<sup>149</sup> In both instances, community pharmacists participate in vaccination planning,  
21  
22 372 pharmacy regulators provide clear guidance on vaccination management, and vaccinations are  
23  
24 373 equitably refunded through public health systems. The removal of barriers, such as economic  
25  
26 374 pressures on pharmacies has resulted in impressive national vaccine uptake, even in large countries,  
27  
28 375 such as Canada.<sup>149</sup> Globally, there is an emerging trend for governments, health insurance companies  
29  
30 376 and consumers to remunerate community pharmacies for services that contribute to improved  
31  
32 377 health outcomes.<sup>150</sup>  
33  
34  
35 378  
36  
37 379 Community pharmacies tend to be defined as premises where medications are dispensed, which  
38  
39 380 compounds the confusion (by the public and decision makers) of professional primary care services  
40  
41 381 versus retailers.<sup>150</sup> Instead, pharmacies should be defined with respect to actions or services that  
42  
43 382 require specialised health knowledge to optimise health outcomes. For example, a retail approach to  
44  
45 383 over-the-counter (OTC) medications is to permit consumers to make their own choices, similar to  
46  
47 384 supermarket choices. Pharmacy input for into OTC purchases could potential decrease adverse  
48  
49 385 medication interactions or unnecessary allergic reactions.<sup>147</sup> The ‘value-add’ of community  
50  
51 386 pharmacies, evidence-informed engagement with consumers, can decrease morbidity and mortality  
52  
53 387 outcomes and increase medication regimen adherence.<sup>150 152</sup>  
54  
55  
56  
57  
58  
59  
60

1  
2  
3 388 Although community pharmacists can provide professional services off premises (e.g.,  
4  
5 389 immunizations in community and religious centres), they need to maintain their physical premises  
6  
7 390 and staff for financial reasons. In addition, pharmacy users seek out community pharmacy services  
8  
9 391 due to their accessibility and convenience, and without a physical space to engage regularly with  
10  
11 392 pharmacy users, trust-building between pharmacists and users is compromised.<sup>153</sup>  
12  
13  
14

15 393

16  
17 394 As evidenced by public media, many countries, including the UK are declaring service specifications  
18  
19 395 for COVID-19 vaccinations. Community pharmacists can potentially provide vaccination services in  
20  
21 396 two locations.<sup>154</sup> They can collaborate with GPs in Primary Care Networks (PCN) to support PCN  
22  
23 397 vaccination sites. Alternatively, they can provide a COVID-19 vaccination service from their premises  
24  
25 398 if they meet service specifications. The described tensions create difficult choices for pharmacists  
26  
27 399 that can be ameliorated through the decision maker recommendations in Table 5.  
28  
29  
30

31 400

### 32 33 401 Unanswered questions and future research 34

35  
36 402 A future realist evaluation involving primary data collection from key actors will inform refinement  
37  
38 403 of the programme theory, CMOCs and decision maker recommendations. This empirical research  
39  
40 404 will address the tensions identified above. Future research will also address issues identified through  
41  
42 405 the stakeholder groups, such as vaccination hesitancy, outside the scope of this review. While this  
43  
44 406 work touched upon unique issues for marginalised populations including BAME groups, those of  
45  
46 407 lower socioeconomic status and those with disabilities, further exploration is needed.  
47

48  
49 408 We had initially focused the review on community pharmacy roles and pandemic response in middle  
50  
51 409 to high-income countries, but found limited data in middle-income countries. The findings are thus  
52  
53 410 more likely to be applicable to high-income countries but may serve to inform practice elsewhere.  
54  
55 411 Empirical research, using for example a realist evaluation approach, should be conducted to extend  
56  
57  
58  
59  
60



1  
2  
3 412 our findings on the role of community pharmacy in COVID vaccination programmes to middle to low  
4  
5 413 income countries.  
6  
7

8 414  
9

## 12 415 Conclusion

15 416 The COVID-19 pandemic is a worldwide health emergency. Vaccination is key to combatting the  
16  
17 417 pandemic. The role of community pharmacy may be both short and long term; with a potential need  
18  
19 418 for regular annual vaccines. This rapid realist review offers recommendations for decision makers to  
20  
21 419 enable community pharmacy to play a key role, both during these unprecedented times and into the  
22  
23 420 future.  
24  
25

26 421  
27  
28

29 422  
30  
31

32 423  
33  
34  
35  
36  
37  
38  
39  
40  
41  
42  
43  
44  
45  
46  
47  
48  
49  
50  
51  
52  
53  
54  
55  
56  
57  
58  
59  
60

## 424 Acknowledgement:

425 We acknowledge the contribution from professional and member of the public key stakeholder.

## 426 Research Ethics Approval

427 This research did not involve human participants and therefore ethical approval was not required.

## 428 Funders

429 Jointly funded by UKRI and NIHR COV0176. The views expressed are those of the author(s) and not  
430 necessarily those of the NIHR, UKRI or the Department of Health and Social Care.

## 431 Contributorship statement

432 IM conceived and led the project and had overall responsibility for PERISCOPE. All team members  
433 developed develop the embryonic programme theory. AB conducted the searches. AB and GW  
434 advised on realist methods. GW also advised on primary care implications and provided  
435 methodological oversight. EY screened documents at title, abstract and full-text with support from  
436 AB and MM. EY, MM and JB coded relevant data into NVivo. EY, MM and JB conducted the data  
437 analysis/synthesis. HZ and AH advised on pharmacy aspects and policy implications. TK led PPI. TK  
438 and HZ advised on implications in BAME communities. All team members contributed drafting the  
439 final report for publication and approved the final draft for submission.

## 440 Data Sharing Statement

441 Data is available upon reasonable request to the lead author.

## 442 Competing Interests

1  
2  
3 443 Geoff Wong is Deputy Chair of the NIHR HTA Prioritisation Committee: Integrated Community Health  
4  
5 444 and Social Care (A) and Member of the NIHR HTA Prioritisation Committee: Integrated Community  
6  
7 445 Health and Social Care (A) Methods Group.  
8

9  
10 446 Andrew Booth is a member of the National Institute for Health Research Health Services and  
11  
12 447 Delivery Research Funding Board, the National Institute for Health Research Evidence Synthesis  
13  
14 448 Programme Advisory Group and the National Institute for Health Research School for Social Care  
15  
16 449 Research Commissioning Panel.  
17

18  
19 450  
20  
21  
22  
23  
24  
25  
26  
27  
28  
29  
30  
31  
32  
33  
34  
35  
36  
37  
38  
39  
40  
41  
42  
43  
44  
45  
46  
47  
48  
49  
50  
51  
52  
53  
54  
55  
56  
57  
58  
59  
60

For peer review only

451 **References**

- 452 1. Parkhurst C, Singh Purewal G, Donyai P. Community Pharmacy and COVID-19—The Unsung Heroes  
453 on Our High Streets. *Journal of Patient Experience* 2020;7(3):282-84. doi:  
454 10.1177/2374373520927638
- 455 2. Maidment I, Lawson S, Wong G, et al. Towards an understanding of the burdens of medication  
456 management affecting older people: the MEMORABLE realist synthesis. *BMC geriatrics*  
457 2020;20(1):183. doi: 10.1186/s12877-020-01568-x [published Online First: 2020/06/06]
- 458 3. Barry HE, Hughes CM. Managing medicines in the time of COVID-19: implications for community-  
459 dwelling people with dementia. *International Journal of Clinical Pharmacy* 2020. doi:  
460 10.1007/s11096-020-01116-y
- 461 4. Wickware C. Pharmacies' dispensing increases by up to a third as a result of COVID-19, survey  
462 finds. . *Pharm J* 2020:PJ April 2020 online. doi: 10.1211/pj.2020.20207917
- 463 5. Pharmaceutical Services Negotiating Committee. Flu Vaccination Service 2020 [Available from:  
464 <https://psnc.org.uk/services-commissioning/advanced-services/flu-vaccination-service>.  
465 Accessed 12/11/20]
- 466 6. Pharmaceutical Services Negotiating Committee. Vaccination Services 2020 [Available from:  
467 [https://psnc.org.uk/services-commissioning/locally-commissioned-services/vaccination-](https://psnc.org.uk/services-commissioning/locally-commissioned-services/vaccination-services)  
468 [services](https://psnc.org.uk/services-commissioning/locally-commissioned-services/vaccination-services). Accessed 08/12/2020]
- 469 7. Rendell T. Community pharmacist-led influenza vaccination: a service evaluation. *The*  
470 *Pharmaceutical Journal* 2020. doi: 10.1211/pj.2020.20208383
- 471 8. Public Health England. Beyond the data: Understanding the impact of COVID-19 on BAME groups.  
472 London: Public Health England, 2020. [Available from:  
473 [https://assets.publishing.service.gov.uk/government/uploads/system/uploads/attachment\\_  
474 data/file/892376/COVID\\_stakeholder\\_engagement\\_synthesis\\_beyond\\_the\\_data.pdf](https://assets.publishing.service.gov.uk/government/uploads/system/uploads/attachment_data/file/892376/COVID_stakeholder_engagement_synthesis_beyond_the_data.pdf).  
475 Accessed 08/12/20]

- 1  
2  
3 476 9. Patel M. We must tear down the barriers to equality for BAME communities highlighted by COVID-  
4  
5 477 19. *Pharmaceutical Journal* 2020. doi: 10.1211/PJ.2020.20208060  
6  
7  
8 478 10. Robinson J. Ten things pharmacists should know about COVID-19 vaccines. *The Pharmaceutical*  
9  
10 479 *Journal* 2020. doi: 10.1211/pj.2020.20208429  
11  
12 480 11. Wong G, Brennan N, Mattick K, et al. Interventions to improve antimicrobial prescribing of  
13  
14 481 doctors in training: the IMPACT (IMProving Antimicrobial presCribing of doctors in Training)  
15  
16 482 realist review. *BMJ Open* 2015;5(10):e009059. doi: 10.1136/bmjopen-2015-009059  
17  
18  
19 483 12. Maidment ID, Lawson S, Wong G, et al. Health Services and Delivery Research. Medication  
20  
21 484 management in older people: the MEMORABLE realist synthesis. Southampton (UK): NIHR  
22  
23 485 Journals Library 2020. doi: 10.3310/hsdr08260  
24  
25  
26 486 13. Maidment I, Young E, Wong G, et al. A rapid realist review of community pharmacy support for  
27  
28 487 the public health agenda during the COVID-19 pandemic and future health emergencies.  
29  
30 488 PROSPERO 2020 CRD42020194078, 2020. doi: 10.1101/2021.02.01.21250765  
31  
32  
33 489 14. Wong G, Greenhalgh T, Westhorp G, et al. Development of methodological guidance, publication  
34  
35 490 standards and training materials for realist and meta-narrative reviews: the RAMESES  
36  
37 491 (Realist And Meta-narrative Evidence Syntheses – Evolving Standards) project. *Health*  
38  
39 492 *Services and Delivery Research* 2014;2(30):1-252. doi: 10.3310/hsdr02300  
40  
41 493 15. Pharmacies across the UK close 'intermittently' to cope with increasing pressures from COVID-19.  
42  
43 494 *The Pharmaceutical Journal* 2020. doi: 10.1211/pj.2020.20207844  
44  
45  
46 495 16. Cadogan CA, Hughes CM. On the frontline against COVID-19: Community pharmacists'  
47  
48 496 contribution during a public health crisis. *Research in Social and Administrative Pharmacy*  
49  
50 497 2021;17(1):2032-35. doi: 10.1016/j.sapharm.2020.03.015  
51  
52  
53 498 17. Royal Pharmaceutical Society. RPS guidance on ethical, professional decision making in the  
54  
55 499 COVID-19 Pandemic. London: Royal Pharmaceutical Society, 2020. [Available from:  
56  
57 500 <https://www.rpharms.com/resources/pharmacy-guides/coronavirus-covid-19/coronavirus->  
58  
59 501 [information-for-pharmacists/ethical-decision-making](https://www.rpharms.com/resources/pharmacy-guides/coronavirus-covid-19/coronavirus-information-for-pharmacists/ethical-decision-making). Accessed 12/12/20]  
60

- 1  
2  
3 502 18. Pharmaceutical Services Negotiating Committee. PSNC Briefing 023/20: Early guidance on the  
4  
5 503 2020/21 Seasonal Influenza Vaccination Advanced Service 2020 [Available from:  
6  
7 504 [https://psnc.org.uk/services-commissioning/psnc-briefings-services-and-](https://psnc.org.uk/services-commissioning/psnc-briefings-services-and-commissioning/psnc-briefing-023-20-early-guidance-on-the-2020-21-seasonal-influenza-vaccination-advanced-service)  
8  
9  
10 505 [commissioning/psnc-briefing-023-20-early-guidance-on-the-2020-21-seasonal-influenza-](https://psnc.org.uk/services-commissioning/psnc-briefings-services-and-commissioning/psnc-briefing-023-20-early-guidance-on-the-2020-21-seasonal-influenza-vaccination-advanced-service)  
11  
12 506 [vaccination-advanced-service](https://psnc.org.uk/services-commissioning/psnc-briefings-services-and-commissioning/psnc-briefing-023-20-early-guidance-on-the-2020-21-seasonal-influenza-vaccination-advanced-service). Accessed 08/12/20]  
13  
14 507 19. Hattingh L, Sim TF, Sunderland B, et al. Successful implementation and provision of enhanced  
15  
16 508 and extended pharmacy services. *Research in Social and Administrative Pharmacy*  
17  
18 509 2020;16(4):464-74. doi: 10.1016/j.sapharm.2019.06.015 [published Online First:  
19  
20 510 2019/07/06]  
21  
22  
23 511 20. Greenhalgh T, Wong G, Westhorp G, et al. Retrodution in realist evaluation. [Internet]. The  
24  
25 512 RAMESES Project 2017. [Available from:  
26  
27 513 [http://www.ramesesproject.org/media/RAMESES\\_II\\_Retrodution.pdf](http://www.ramesesproject.org/media/RAMESES_II_Retrodution.pdf). Accessed 12/12/20]  
28  
29  
30 514 21. Wong G. Data Gathering in Realist Reviews: Looking for needles in haystacks. Doing Realist  
31  
32 515 Research: SAGE Publications Ltd, 2018:131-46. doi: 10.4135/9781526451729.n9  
33  
34 516 22. Long N. Development sociology: actor perspectives. London: Routledge 2003.  
35  
36  
37 517 23. National Pharmacy Association. Public see pharmacies as key to the future of healthcare in wake  
38  
39 518 of pandemic 2020 [Available from: [https://www.npa.co.uk/news-and-events/news-](https://www.npa.co.uk/news-and-events/news-item/public-see-pharmacies-as-key-to-the-future-of-healthcare-in-wake-of-pandemic)  
40  
41 519 [item/public-see-pharmacies-as-key-to-the-future-of-healthcare-in-wake-of-pandemic](https://www.npa.co.uk/news-and-events/news-item/public-see-pharmacies-as-key-to-the-future-of-healthcare-in-wake-of-pandemic).  
42  
43 520 Accessed 14/01/2021].  
44  
45  
46 521 24. Royal Pharmaceutical Society. RPS Statement on the role of pharmacists in the COVID-19  
47  
48 522 Vaccination Programme London: Royal Pharmaceutical Society; 2020 [Available from:  
49  
50 523 [https://www.rpharms.com/Portals/0/FINAL\\_Statement%20on%20COVID-](https://www.rpharms.com/Portals/0/FINAL_Statement%20on%20COVID-19%20Vaccination_Dec%202020_.pdf?ver=2020-12-02-143304-017)  
51  
52 524 [19%20Vaccination\\_Dec%202020\\_.pdf?ver=2020-12-02-143304-017](https://www.rpharms.com/Portals/0/FINAL_Statement%20on%20COVID-19%20Vaccination_Dec%202020_.pdf?ver=2020-12-02-143304-017). Accessed 14/01/2021].  
53  
54  
55 525 25. Strand MA, Bratberg J, Eukel H, et al. Community Pharmacists' Contributions to Disease  
56  
57 526 Management During the COVID-19 Pandemic. *Preventing Chronic Disease* 2020;17. doi:  
58  
59 527 10.5888/pcd17.200317  
60

- 1  
2  
3 528 26. Elbeddini A, Prabakaran T, Almasalkhi S, et al. Pharmacists and COVID-19. *Journal of*  
4  
5 529 *Pharmaceutical Policy and Practice* 2020;13(1). doi: 10.1186/s40545-020-00241-3  
6  
7 530 27. Kirkdale CL, Nebout G, Taitel M, et al. Implementation of flu vaccination in community  
8  
9 pharmacies: Understanding the barriers and enablers. *Annales Pharmaceutiques Françaises*  
10 531  
11 2017;75(1):9-16. doi: 10.1016/j.pharma.2016.08.006  
12 532  
13 533 28. Hindi AMK, Jacobs S, Schafheutle EI. Solidarity or dissonance? A systematic review of pharmacist  
14  
15 and GP views on community pharmacy services in the UK. *Health & Social Care in the*  
16 534  
17 *Community* 2018;27(3):565-98. doi: 10.1111/hsc.12618  
18 535  
19 536 29. Deslandes R, Evans A, Baker S, et al. Community pharmacists at the heart of public health: A  
20  
21 longitudinal evaluation of the community pharmacy influenza vaccination service. *Research*  
22 537  
23 *in Social and Administrative Pharmacy* 2020;16(4):497-502. doi:  
24 538  
25 10.1016/j.sapharm.2019.06.016  
26 539  
27 540 30. Sousa Pinto G, Hung M, Okoya F, et al. FIP's response to the COVID-19 pandemic: Global  
28  
29 pharmacy rises to the challenge. *Research in Social and Administrative Pharmacy*  
30 541  
31 2021;17(1):1929-33. doi: 10.1016/j.sapharm.2020.07.004  
32 542  
33 543 31. Gregory PAM, Austin Z. COVID-19: How did community pharmacies get through the first wave?  
34  
35 *Canadian Pharmacists Journal / Revue des Pharmaciens du Canada* 2020;153(5):243-51. doi:  
36 544  
37 10.1177/1715163520945741  
38 545  
39 546 32. Ung COL. Community pharmacist in public health emergencies: Quick to action against the  
40  
41 coronavirus 2019-nCoV outbreak. *Research in Social and Administrative Pharmacy*  
42 547  
43 2020;16(4):583-86. doi: 10.1016/j.sapharm.2020.02.003  
44 548  
45 549 33. Burson RC, Buttenheim AM, Armstrong A, et al. Community pharmacies as sites of adult  
46  
47 vaccination: A systematic review. *Human vaccines & immunotherapeutics* 2016;12(12):3146-  
48 550  
49 59. doi: 10.1080/21645515.2016.1215393 [published Online First: 08/15]  
50 551  
51  
52  
53  
54  
55  
56  
57  
58  
59  
60

- 1  
2  
3 552 34. Nadeem MF, Samanta S, Mustafa F. Is the paradigm of community pharmacy practice expected  
4  
5 553 to shift due to COVID-19? *Research in Social and Administrative Pharmacy* 2021;17(1):2046-  
6  
7 554 48. doi: 10.1016/j.sapharm.2020.05.021  
8  
9  
10 555 35. Francis M, Hinchliffe A, Wales N. Vaccination services through community pharmacy. *Public*  
11  
12 556 *Health Wales NHS Trust, Wales: NHS Wales* 2010. [Available from:  
13  
14 557 <http://www2.nphs.wales.nhs.uk:8080/HealthServiceQTDDocs.nsf/public/CBDDC3C0BE9449>  
15  
16 558 398025793B00341A6F/\$file/Vaccination%20services%20through%20community%20pharma  
17  
18 559 cy%20v1a.pdf. Accessed 08/12/20]  
19  
20  
21 560 36. Clews G. Pharmacists able to administer unlicensed COVID-19 vaccines following legislation  
22  
23 561 changes. *The Pharmaceutical Journal* 2020;305. doi: 10.1211/PJ.2020.20208453  
24  
25 562 37. Welsh Government, Department of Health N. I., Scottish Government, et al. Supporting  
26  
27 563 pharmacists, pharmacy technicians and pharmacy teams throughout the second COVID-19  
28  
29 564 wave, 2020. [Available from: [https://www.pharmacyregulation.org/news/joint-letter-](https://www.pharmacyregulation.org/news/joint-letter-supporting-pharmacy-professionals-and-teams-through-second-covid-19-wave)  
30  
31 565 [supporting-pharmacy-professionals-and-teams-through-second-covid-19-wave](https://www.pharmacyregulation.org/news/joint-letter-supporting-pharmacy-professionals-and-teams-through-second-covid-19-wave). Accessed  
32  
33 566 12/12/20]  
34  
35  
36 567 38. Wickware C. NHS England to choose 'selected' number of pharmacies to deliver at least 1,000  
37  
38 568 COVID-19 vaccines per week. *The Pharmaceutical Journal* 2020. doi:  
39  
40 569 10.1211/PJ.2020.20208608  
41  
42  
43 570 39. Dyer C. Covid-19: Government poised to amend regulations to allow use of unlicensed vaccine.  
44  
45 571 *The BMJ* 2020. doi: 10.1136/bmj.m3757  
46  
47  
48 572 40. Cooper RJ. Pestle and mortar: the demise of community pharmacy in the UK. *International*  
49  
50 573 *Journal of Pharmacy Practice* 2020;28(3):205-06. doi: 10.1111/ijpp.12635  
51  
52 574 41. Robinson J. Health professionals delivering unlicensed vaccines need government protection, say  
53  
54 575 health bodies. *The Pharmaceutical Journal* 2020. doi: 10.1211/PJ.2020.20208381  
55  
56  
57  
58  
59  
60



- 1  
2  
3 576 42. Warner JG, Portlock J, Smith J, et al. Increasing seasonal influenza vaccination uptake using  
4  
5 577 community pharmacies: experience from the Isle of Wight, England. *International Journal of*  
6  
7 578 *Pharmacy Practice* 2013;21(6):362-67. doi: 10.1111/ijpp.12037  
8  
9  
10 579 43. Hindi AMK, Schafheutle EI, Jacobs S. Community pharmacy integration within the primary care  
11  
12 580 pathway for people with long-term conditions: a focus group study of patients', pharmacists'  
13  
14 581 and GPs' experiences and expectations. *BMC Fam Pract* 2019;20(1):26-26. doi:  
15  
16 582 10.1186/s12875-019-0912-0  
17  
18  
19 583 44. Pharmacy Voice, The Pharmaceutical Services Negotiating Committee, The Royal Pharmaceutical  
20  
21 584 Society, et al. Consultation response: UK Influenza Pandemic Preparedness Strategy 2011.  
22  
23 585 2011  
24  
25 586 45. Bauman JL. Hero clinical pharmacists and the COVID-19 pandemic: Overworked and overlooked.  
26  
27 587 *JACCP JAm Coll Clin Pharm* 2020. doi: 10.1002/jac5.1246  
28  
29  
30 588 46. Stone JK, Pate AN. The Impact of COVID-19 Through the Eyes of a Fourth-Year Pharmacy Student.  
31  
32 589 *American Journal of Pharmaceutical Education* 2020;84(6):ajpe8146. doi: 10.5688/ajpe8146  
33  
34 590 47. Royal College of General Practitioners. Delivering Mass Vaccinations During COVID-19 A Logistical  
35  
36 591 Guide for General Practice. London: Royal College of General Practitioners, 2020. [Available  
37  
38 592 from: [https://www.lmc.org.uk/visageimages/Covid-](https://www.lmc.org.uk/visageimages/Covid-19/RCGPMassVaccinationattimeofcovidV3.1.pdf)  
39  
40 593 [19/RCGPMassVaccinationattimeofcovidV3.1.pdf](https://www.lmc.org.uk/visageimages/Covid-19/RCGPMassVaccinationattimeofcovidV3.1.pdf). Accessed 08.12.20]  
41  
42  
43 594 48. NHS England and NHS Improvement coronavirus. Urgent preparing for General Practice to  
44  
45 595 contribute to a potential COVID-19 Vaccination Programme. In: Service NH, ed. London,  
46  
47 596 2020. [Available from: [https://www.england.nhs.uk/coronavirus/covid-19-vaccination-](https://www.england.nhs.uk/coronavirus/covid-19-vaccination-programme/primary-care-guidance/preparing-for-gp-to-contribute-to-a-potential-covid-19-vaccination-programme)  
48  
49 597 [programme/primary-care-guidance/preparing-for-gp-to-contribute-to-a-potential-covid-19-](https://www.england.nhs.uk/coronavirus/covid-19-vaccination-programme/primary-care-guidance/preparing-for-gp-to-contribute-to-a-potential-covid-19-vaccination-programme)  
50  
51 598 [vaccination-programme](https://www.england.nhs.uk/coronavirus/covid-19-vaccination-programme/primary-care-guidance/preparing-for-gp-to-contribute-to-a-potential-covid-19-vaccination-programme). Accessed 08/12/20]  
52  
53  
54 599 49. Wickware, C. NHS England to choose 'selected' number of pharmacies to deliver at least 1,000  
55  
56 600 COVID-19 vaccines per week. *The Pharmaceutical Journal* 2020. doi:  
57  
58 601 10.1211/pj.2020.20208608  
59  
60

- 1  
2  
3 602 50. Koster ES, Philbert D, Bouvy ML. Impact of the COVID-19 epidemic on the provision of  
4  
5 603 pharmaceutical care in community pharmacies. *Research in Social and Administrative*  
6  
7 604 *Pharmacy* 2020. doi: 10.1016/j.sapharm.2020.07.001  
8  
9  
10 605 51. Elbeddini A, Wen CX, Tayefehchamani Y, et al. Mental health issues impacting pharmacists during  
11  
12 606 COVID-19. *Journal of Pharmaceutical Policy and Practice* 2020;13(1). doi: 10.1186/s40545-  
13  
14 607 020-00252-0  
15  
16 608 52. Bukhari N, Rasheed H, Nayyer B, et al. Pharmacists at the frontline beating the COVID-19  
17  
18 609 pandemic. *Journal of Pharmaceutical Policy and Practice* 2020;13 (1). doi: 10.1186/s40545-  
19  
20 610 020-00210-w  
21  
22  
23 611 53. Eidt, M. Pharmacists on the frontline. *Canadian Pharmacists Journal* 2020;153(4):186-90. doi:  
24  
25 612 10.1177/1715163520930191  
26  
27  
28 613 54. Farrell B, Tsuyuki RT. Pharmacists step up to the challenge of COVID-19. *Canadian Pharmacists*  
29  
30 614 *Journal* 2020;153(4):185. doi: 10.1177/1715163520930705  
31  
32 615 55. Bragazzi NL, Mansour M, Bonsignore A, et al. The Role of Hospital and Community Pharmacists in  
33  
34 616 the Management of COVID-19: Towards an Expanded Definition of the Roles,  
35  
36 617 Responsibilities, and Duties of the Pharmacist. *Pharmacy (Basel, Switzerland)* 2020. doi:  
37  
38 618 10.3390/pharmacy8030140  
39  
40  
41 619 56. Chan AHY, Rutter V, Ashiru-Oredope D, et al. Together we unite: The role of the Commonwealth  
42  
43 620 in achieving universal health coverage through pharmaceutical care amidst the COVID-19  
44  
45 621 pandemic. *Journal of Pharmaceutical Policy and Practice* 2020;13(1). doi: 10.1186/s40545-  
46  
47 622 020-00214-6  
48  
49  
50 623 57. Moore A. Pharmacists in one county say working with GP practices during the COVID-19  
51  
52 624 pandemic has been 'difficult'. *The Pharmaceutical Journal* 2020. doi:  
53  
54 625 10.1211/PJ.2020.20208556  
55  
56  
57  
58  
59  
60

- 1  
2  
3 626 58. Hoti K, Jakupi A, Hetemi D, et al. Provision of community pharmacy services during COVID-19  
4  
5 627 pandemic: a cross sectional study of community pharmacists' experiences with preventative  
6  
7 628 ...: Springer 2020. doi: 10.1007/s11096-020-01078-1  
8  
9  
10 629 59. NHS England and NHS Improvement coronavirus. Urgent preparing for Community Pharmacy to  
11  
12 630 contribute to a potential COVID-19 Vaccination Programme. In: Service NH, ed. London,  
13  
14 631 2020. [Available from: [https://www.england.nhs.uk/coronavirus/covid-19-vaccination-  
19  
20 634 programme/primary-care-guidance/preparing-for-community-pharmacy-to-contribute-to-a-  
21  
22 635 potential-covid-19-vaccination-programme](https://www.england.nhs.uk/coronavirus/covid-19-vaccination-<br/>15<br/>16 632 programme/primary-care-guidance/preparing-for-community-pharmacy-to-contribute-to-a-<br/>17<br/>18 633 potential-covid-19-vaccination-programme). Accessed 08/12/20]  
23  
24 60. Austin Z, Martin JC, Gregory PAM. Pharmacy practice in times of civil crisis: The experience of  
25  
26 636 SARS and “the blackout” in Ontario, Canada. *Research in Social and Administrative Pharmacy*  
27  
28 637 2007;3(3):320-35. doi: 10.1016/j.sapharm.2006.09.001  
29  
30 61. Chahine EB. The Role of Pharmacists in the Fight Against COVID-19. *Sr Care Pharm*  
31  
32 638 2020;35(7):286-91. doi: 10.4140/TCP.n.2020.286  
33  
34 62. Jubraj B. Remote consultations: how pharmacy teams can practise them successfully:  
35  
36 640 pharmaceutical-journal.com 2020. [Available from: [https://pharmaceutical-  
41  
42 643 journal.com/article/ld/remote-consultations-how-pharmacy-teams-can-practise-them-  
43  
44 644 successfully](https://pharmaceutical-<br/>37<br/>38 641 journal.com/article/ld/remote-consultations-how-pharmacy-teams-can-practise-them-<br/>39<br/>40 642 successfully). Accessed 12/12/20]  
45  
46 63. Royal Pharmaceutical Society. All-Party Pharmacy Group warns of pressures on pharmacies  
47  
48 645 London: Royal Pharmaceutical Society 2020 [Available from:  
49  
50 646 [https://www.rpharms.com/about-us/news/details/All-Party-Pharmacy-Group-warns-of-  
57  
58 650 pressures-on-pharmacies#:~:text=The%20All%20Party%20Pharmacy%20Group,continued%20pressures%  
59  
60 651 20facing%20community%20pharmacies](https://www.rpharms.com/about-us/news/details/All-Party-Pharmacy-Group-warns-of-<br/>51<br/>52 647 https://www.rpharms.com/about-us/news/details/All-Party-Pharmacy-Group-warns-of-<br/>53<br/>54 648 pressures-on-pharmacies#:~:text=The%20All%20Party%20Pharmacy%20Group,continued%20pressures%<br/>55<br/>56 649 20facing%20community%20pharmacies). Accessed 14/01/2021]  
62. Barnes E, Bullock A, Allan M, et al. Community pharmacists' opinions on skill-mix and delegation  
in England. *International Journal of Pharmacy Practice* 2017;26(5):398-406. doi:  
10.1111/ijpp.12419

- 1  
2  
3 652 65. Saramunee K, Krska J, Mackridge A, et al. How to enhance public health service utilization in  
4  
5 653 community pharmacy?: General public and health providers' perspectives. *Research in Social*  
6  
7 654 *and Administrative Pharmacy* 2014;10(2):272-84. doi: 10.1016/j.sapharm.2012.05.006  
8  
9  
10 655 66. Houle SKD, Grindrod KA, Chatterley T, et al. Paying pharmacists for patient care: A systematic  
11  
12 656 review of remunerated pharmacy clinical care services. *Can Pharm J (Ott)* 2014;147(4):209-  
13  
14 657 32. doi: 10.1177/1715163514536678  
15  
16 658 67. Burns C. Pharmacy staff in Scotland to receive £500 bonus in recognition of COVID-19 service. *the*  
17  
18 *Pharmaceutical Journal* 2020 doi: 10.1211/PJ.2020.20208614 [published Online First:  
19 659 12/2020]  
20  
21 660  
22  
23 661 68. Evans AM, Wood FC, Carter B. National community pharmacy NHS influenza vaccination service  
24  
25 662 in Wales: a primary care mixed methods study. *British Journal of General Practice*  
26  
27 663 2016;66(645):e248-e57. doi: 10.3399/bjgp16x684349  
28  
29  
30 664 69. Moore A. No going back: how the pandemic is changing community pharmacy. *The*  
31  
32 665 *Pharmaceutical Journal* 2020;305. doi: 10.1211/PJ.2020.20208309  
33  
34 666 70. Merks P, Jakubowska M, Drelich E, et al. The legal extension of the role of pharmacists in light of  
35  
36 667 the COVID-19 global pandemic. *Research in Social and Administrative Pharmacy* 2020 doi:  
37  
38 668 10.1016/j.sapharm.2020.05.033  
39  
40  
41 669 71. Zaidi STR, Hasan SS. Personal protective practices and pharmacy services delivery by community  
42  
43 670 pharmacists during COVID-19 pandemic: Results from a national survey. *Research in Social*  
44  
45 671 *and Administrative Pharmacy* 2020. doi: 10.1016/j.sapharm.2020.07.006  
46  
47  
48 672 72. Anon. Pharmacies must be at the forefront of the COVID-19 vaccination campaign. *The*  
49  
50 673 *Pharmaceutical Journal* 2020;305. doi: 10.1211/PJ.2020.20208546  
51  
52 674 73. Robinson J. England has lowest number of community pharmacies in five years, figures show.  
53  
54 675 *The Pharmaceutical Journal* 2020. doi: 10.1211/PJ.2020.20208569  
55  
56  
57 676 74. Wickware C. Pharmacies to be paid 50p more per flu vaccination in 2020/2021. *The*  
58  
59 677 *Pharmaceutical Journal* 2020. doi: 10.1211/PJ.2020.20208362  
60

- 1  
2  
3 678 75. Doyle-Price J. Pharmacies have an important role in this pandemic – but they need help to  
4  
5 679 continue saving lives. *The Telegraph* 2020. [Available from:  
6  
7 680 <https://www.telegraph.co.uk/global-health/science-and-disease/pharmacies-have-crucial->  
8  
9 681 [place-communities-need-help-continue](https://www.telegraph.co.uk/global-health/science-and-disease/pharmacies-have-crucial-place-communities-need-help-continue). Accessed 12/12/20]  
10  
11  
12 682 76. Robinson J. Up to 85% of community pharmacies could be in financial deficit by 2024, economic  
13  
14 683 analysis concludes. *The Pharmaceutical Journal* 2020. doi: 10.1211/PJ.2020.20208332  
15  
16 684 77. Wilkinson E, Connelly D. Is pharmacy prepared for a resurgence of COVID-19? *The*  
17  
18 685 *Pharmaceutical Journal* 2020;305. doi: 10.1211/PJ.2020.20208340  
19  
20  
21 686 78. Hayden JC, Parkin R. The challenges of COVID-19 for community pharmacists and opportunities  
22  
23 687 for the future. *Irish Journal of Psychological Medicine* 2020;37(3):198-203. doi:  
24  
25 688 10.1017/ipm.2020.52  
26  
27  
28 689 79. Mercadante AR, Yokota M, Hwang A, et al. Choosing Evolution over Extinction: Integrating Direct  
29  
30 690 Patient Care Services and Value-Based Payment Models into the Community-Based  
31  
32 691 Pharmacy Setting. *Pharmacy* 2020;8(3):128. doi: 10.3390/pharmacy8030128  
33  
34  
35 692 80. Stewart K, Barai R, Priorities N. How to keep your community pharmacy running during the  
36  
37 693 COVID-19 pandemic 2020. [Available from: [https://pharmaceutical-](https://pharmaceutical-journal.com/article/ld/how-to-keep-your-community-pharmacy-running-during-the-covid-19-pandemic)  
38  
39 694 [journal.com/article/ld/how-to-keep-your-community-pharmacy-running-during-the-covid-](https://pharmaceutical-journal.com/article/ld/how-to-keep-your-community-pharmacy-running-during-the-covid-19-pandemic)  
40  
41 695 [19-pandemic](https://pharmaceutical-journal.com/article/ld/how-to-keep-your-community-pharmacy-running-during-the-covid-19-pandemic). Accessed 24/02/21]  
42  
43  
44 696 81. Hussain R, Dawoud DM, Babar Z-U-D. Drive-thru pharmacy services: A way forward to combat  
45  
46 697 COVID-19 pandemic. *Research in Social and Administrative Pharmacy* 2021;17(1):1920-24.  
47  
48 698 doi: 10.1016/j.sapharm.2020.07.015  
49  
50 699 82. Broughel J, Yatsyshina Y. Relax Pharmacy Regulations to Help with COVID-19 Testing and  
51  
52 700 Treatment. *SSRN Electronic Journal* 2020. doi: 10.2139/ssrn.3564463  
53  
54  
55 701 83. Pritchard RI, Huff J, Scheinberg N. Impact of Regulatory Changes on Pharmacist Delivered  
56  
57 702 Telehealth During the COVID-19 Pandemic. *Journal of the American Pharmacists Association*  
58  
59 703 2020;60(6):e76-e79. doi: 10.1016/j.japh.2020.06.004  
60

- 1  
2  
3 704 84. Lynch M, Leary A. COVID-19 related regulatory change for pharmacists – The case for its  
4  
5 705 retention post the pandemic. *Research in Social and Administrative Pharmacy* 2020. doi:  
6  
7 706 10.1016/j.sapharm.2020.07.037  
8  
9  
10 707 85. Erku DA, Belachew SA, Abrha S, et al. When fear and misinformation go viral: Pharmacists' role in  
11  
12 708 deterring medication misinformation during the 'infodemic' surrounding COVID-19. *Research*  
13  
14 709 *in Social and Administrative Pharmacy* 2020. doi: 10.1016/j.sapharm.2020.04.032  
15  
16 710 86. Andrawis M, Carmichael J, Collins CD, et al. Improving patient care and demonstrating value  
17  
18 711 during a global pandemic: Recommendations from leaders of the Pharmacy Accountability  
19  
20 712 Measures Work Group. *American journal of health-system pharmacy : AJHP : official journal*  
21  
22 713 *of the American Society of Health-System Pharmacists* 2020. doi: 10.1093/ajhp/zxaa291  
23  
24 714 87. Kawaguchi-Suzuki M, Nagai N, Akonoghrere RO. COVID-19 Pandemic Challenges and Lessons  
25  
26 715 Learned by Pharmacy Educators Around the Globe. *American Journal of Pharmaceutical*  
27  
28 716 *Education* 2020;84(8) [published Online First: 2020 Aug 1]. doi: 10.5688/ajpe8197  
29  
30 717 88. General Pharmaceutical Council. Rising to the challenge [blog] 2020 [Available from:  
31  
32 718 <https://www.pharmacyregulation.org/regulate/blog/rising-challenge>. Accessed 14/01/2020  
33  
34 719 2020]  
35  
36  
37  
38  
39 720 89. Robinson J. Government consults on allowing pharmacy technicians to administer COVID-19 and  
40  
41 721 flu vaccines. *The Pharmaceutical Journal* 2020. doi: 10.1211/PJ.2020.20208311  
42  
43 722 90. Nessel, J. Pharmacy Technicians Rise to Meet Patient Needs During Coronavirus Pandemic.  
44  
45 723 *Pharmacy Times* 2020. Available from: [https://www.pharmacytimes.com/view/pharmacy-](https://www.pharmacytimes.com/view/pharmacy-technicians-rise-to-meet-patient-needs-during-coronavirus-pandemic)  
46  
47 724 [technicians-rise-to-meet-patient-needs-during-coronavirus-pandemic](https://www.pharmacytimes.com/view/pharmacy-technicians-rise-to-meet-patient-needs-during-coronavirus-pandemic). Accessed 08.12.20]  
48  
49  
50 725 91. Green TC, Bratberg J, Finnell DS. Opioid use disorder and the COVID 19 pandemic: A call to  
51  
52 726 sustain regulatory easements and further expand access to treatment. *Subst Abus*  
53  
54 727 2020;41(2):147-49. doi: 10.1080/08897077.2020.1752351  
55  
56  
57 728 92. Carico R. Pharmacists continue to protect communities during COVID-19. *Journal of the American*  
58  
59 729 *Pharmacists Association* 2020;60(5):660-61. doi: 10.1016/j.japh.2020.08.009  
60

- 1  
2  
3 730 93. Bond C, Blenkinsopp A, Inch J, et al. The effect of the new community pharmacy contract on the  
4  
5 731 community pharmacy workforce. *London: Pharmacy Practice Research Trust* 2008;8:9.  
6  
7 732 Available from: [https://pharmacyresearchuk.org/wp-](https://pharmacyresearchuk.org/wp-content/uploads/2012/11/The_effect_of_the_new_community_pharmacy_contract_on_the_community_pharmacy_workforce.pdf)  
8  
9  
10 733 content/uploads/2012/11/The\_effect\_of\_the\_new\_community\_pharmacy\_contract\_on\_the  
11  
12 734 \_community\_pharmacy\_workforce.pdf. Accessed 08/12/20]
- 14 735 94. Melton BL, Lai Z. Review of community pharmacy services: what is being performed, and where  
15  
16 736 are the opportunities for improvement? *Integr Pharm Res Pract* 2017;6:79-89. doi:  
17  
18 737 10.2147/IPRP.S107612
- 21 738 95. Wilson CG, Ramage M, Fagan EB. A Primary Care Response to COVID-19 for Patients with an  
22  
23 739 Opioid Use Disorder. *J Rural Health* 2020. doi: 10.1111/jrh.12438
- 25 740 96. Kostev K, Lauterbach S. Panic buying or good adherence? Increased pharmacy purchases of drugs  
26  
27 741 from wholesalers in the last week prior to Covid-19 lockdown. *J Psychiatr Res* 2020;130:19-  
28  
29 742 21. doi: 10.1016/j.jpsychires.2020.07.005
- 32 743 97. Bell JS, Reynolds L, Freeman C, et al. Strategies to promote access to medications during the  
33  
34 744 COVID-19 pandemic. *Aust J Gen Pract* 2020;49(8):530-32. doi: 10.31128/AJGP-04-20-5390
- 36 745 98. Romano S, Galante H, Figueira D, et al. Time-trend analysis of medicine sales and shortages  
37  
38 746 during COVID-19 outbreak: Data from community pharmacies. *Research in Social and*  
39  
40 747 *Administrative Pharmacy* 2020. doi: 10.1016/j.sapharm.2020.05.024
- 43 748 99. Gross AE, MacDougall C. Roles of the clinical pharmacist during the COVID-19 pandemic. *JACCP*  
44  
45 749 *JAm Coll Clin Pharm* 2020;3(3):564-66. doi: 10.1002/jac5.1231
- 48 750 100. Lapeyre-Mestre M, Boucher A, Daveluy A, et al. Addictovigilance contribution during COVID-19  
49  
50 751 epidemic and lockdown in France. *Therapies* 2020. doi: 10.1016/j.therap.2020.06.006
- 52 752 101. Alderman C. Pharmacy Services and the Novel Coronavirus. *The Senior Care Pharmacist* 2020;35  
53  
54 753 (4):146-47. doi: 10.4140/TCP.n.2020.146

- 1  
2  
3 754 102. Hasan SS, Kow CS, Zaidi STR. Social distancing and the use of PPE by community pharmacy  
4  
5 755 personnel: Does evidence support these measures? *Research in Social and Administrative*  
6  
7 756 *Pharmacy* 2020;17(2):456-9. doi: 10.1016/j.sapharm.2020.04.033  
8  
9  
10 757 103. Thomas CEL, Phipps DL, Ashcroft DM. When procedures meet practice in community  
11  
12 758 pharmacies: qualitative insights from pharmacists and pharmacy support staff. *BMJ open*  
13  
14 759 2016;6(6):e010851-e51. doi: 10.1136/bmjopen-2015-010851  
15  
16 760 104. NHS England and NHS Improvement coronavirus. Standard operating procedure: COVID-19 local  
17  
18 761 vaccination services deployment in community settings. London: National Health Service  
19  
20 762 2020. Available from: [https://www.england.nhs.uk/coronavirus/publication/standard-](https://www.england.nhs.uk/coronavirus/publication/standard-operating-procedure-covid-19-local-vaccination-services-deployment-in-community-settings)  
21  
22 763 [operating-procedure-covid-19-local-vaccination-services-deployment-in-community-](https://www.england.nhs.uk/coronavirus/publication/standard-operating-procedure-covid-19-local-vaccination-services-deployment-in-community-settings)  
23  
24 764 [settings](https://www.england.nhs.uk/coronavirus/publication/standard-operating-procedure-covid-19-local-vaccination-services-deployment-in-community-settings). Accessed 08.12.20]  
25  
26  
27 765 105. Cabas P, Di Bella S, Giuffrè M, et al. Community pharmacists' exposure to COVID-19. *Research in*  
28  
29 766 *Social and Administrative Pharmacy* 2021;17(1):1882-87. doi:  
30  
31 767 10.1016/j.sapharm.2020.05.020  
32  
33  
34 768 106. Sum ZZ, Ow CJW. Community pharmacy response to infection control during COVID-19. A cross-  
35  
36 769 sectional survey. *Res Soc Adm Pharm* 2020;17(1):1845-52. doi:  
37  
38 770 10.1016/j.sapharm.2020.06.014  
39  
40  
41 771 107. Al-Quteimat OM, Amer AM. SARS-CoV-2 outbreak: How can pharmacists help? *Research in*  
42  
43 772 *Social and Administrative Pharmacy* 2021;17(2):480-82. doi: 10.1016/j.sapharm.2020.03.018  
44  
45 773 [published Online First: 2020 Mar 26]  
46  
47  
48 774 108. Dawoud D. Emerging from the other end: Key measures for a successful COVID-19 lockdown  
49  
50 775 exit strategy and the potential contribution of pharmacists. *Research in Social and*  
51  
52 776 *Administrative Pharmacy* 2020. doi: 10.1016/j.sapharm.2020.05.011  
53  
54 777 109. Weir NM, Newham R, Bennie M. A literature review of human factors and ergonomics within  
55  
56 778 the pharmacy dispensing process. *Research in Social and Administrative Pharmacy*  
57  
58 779 2020;16(5):637-45. doi: 10.1016/j.sapharm.2019.08.029  
59  
60



- 1  
2  
3 780 110. Maine LL. An Unparalleled Spirit of Collaboration Amid the COVID-19 Pandemic. *Am J Pharm*  
4  
5 781 *Educ* 2020;84(6):ajpe8155-ajpe55. doi: 10.5688/ajpe8155  
6  
7 782 111. Dowden A. Will Serious Shortage Protocols help ease drug shortages? *Prescriber* 2020;31(5):29-  
8  
9 783 31. doi: 10.1002/psb.1844  
10  
11 784 112. NHS England, NHS Improvement coronavirus. Novel coronavirus (COVID-19) standard operating  
12  
13 785 procedure-Community Pharmacy. [Available from: [https://www.england.nhs.uk/wp-](https://www.england.nhs.uk/wp-content/uploads/2020/02/20200305-COVID-19-PRIMARY-CARE-SOP-COMM-PHARM-PUBLICATION-V1)  
14  
15 786 [content/uploads/2020/02/20200305-COVID-19-PRIMARY-CARE-SOP-COMM-PHARM-](https://www.england.nhs.uk/wp-content/uploads/2020/02/20200305-COVID-19-PRIMARY-CARE-SOP-COMM-PHARM-PUBLICATION-V1)  
16  
17 787 [PUBLICATION-V1](https://www.england.nhs.uk/wp-content/uploads/2020/02/20200305-COVID-19-PRIMARY-CARE-SOP-COMM-PHARM-PUBLICATION-V1). 2020 Apr;1: skills4pharmacy.org.uk 2020. Accessed 08/12/20]  
18  
19 788 113. Butt M. Covid-19 vaccination: Logistical challenges for general practice. *Practice Management*  
20  
21 789 2021;31(1):20-21. doi: 10.12968/prma.2021.31.1.20  
22  
23 790 114. National Pharmacy Association (NPA). Pharmacy on the NHS frontline 2020 [Available from:  
24  
25 791 <https://nhsfrontline.com/coronavirus-stories-from-the-health-service-frontline>. Accessed  
26  
27 792 17/08/2020 2020]  
28  
29 793 115. Pharmaceutical Services Negotiating Committee. Community Pharmacy Contractual  
30  
31 794 Framework: Pharmaceutical Services Negotiating Committee; 2021 [Available from:  
32  
33 795 <https://psnc.org.uk/contract-it/the-pharmacy-contract>. Accessed 08/02/21  
34  
35 796 116. Quinn B. UK pharmacists facing abuse and violence during lockdown. *The Guardian* 2020 Apr  
36  
37 797 2nd 2020. [Available from: [https://www.theguardian.com/world/2020/apr/02/uk-](https://www.theguardian.com/world/2020/apr/02/uk-pharmacists-facing-abuse-and-violence-during-coronavirus-lockdown)  
38  
39 798 [pharmacists-facing-abuse-and-violence-during-coronavirus-lockdown](https://www.theguardian.com/world/2020/apr/02/uk-pharmacists-facing-abuse-and-violence-during-coronavirus-lockdown). Accessed 12/12/20]  
40  
41 799 117. Wickware C. Health board pilots delivery of flu vaccines by pharmacy technicians to manage  
42  
43 800 increased demand. *The Pharmaceutical Journal* 2020. doi: 10.1211/PJ.2020.20208565  
44  
45 801 118. Royal Pharmaceutical Society. The future of pharmacy in a sustainable NHS: Key principles for  
46  
47 802 transformation and growth. London: Royal Pharmaceutical Society, 2020. [Available from:  
48  
49 803 <https://www.rpharms.com/recognition/all-our-campaigns/policy-a-z/future-of-pharmacy>.  
50  
51 804 Accessed 08/01/21]  
52  
53  
54  
55  
56  
57  
58  
59  
60

- 1  
2  
3 805 119. Sparkman A, Brookhart AL, Goode J-VKR. The impact of an immunization check-up at a  
4  
5 806 pharmacist-provided employee health screening. *Journal of the American Pharmacists*  
6  
7 807 *Association* 2017;57(3):S274-S78. doi: 10.1016/j.japh.2017.02.010  
8  
9  
10 808 120. Rodgers RM, Gammie SM, Loo RL, et al. Comparison of pharmacist and public views and  
11  
12 809 experiences of community pharmacy medicines-related services in England. *Patient Prefer*  
13  
14 810 *Adherence* 2016;10:1749-58. doi: 10.2147/PPA.S112931  
15  
16 811 121. Hindi AMK, Schafheutle EI, Jacobs S. Patient and public perspectives of community pharmacies  
17  
18 812 in the United Kingdom: A systematic review. *Health Expectations* 2017;21(2):409-28. doi:  
19  
20 813 10.1111/hex.12639  
21  
22  
23 814 122. Letley L, Ramsay M. Discussing the MMR vaccine with patients. *The Pharmaceutical Journal*  
24  
25 815 2019. doi: 10.1211/pj.2019.20205819  
26  
27  
28 816 123. Kember J, Hodson K, James DH. The public's perception of the role of community pharmacists in  
29  
30 817 Wales. *International Journal of Pharmacy Practice* 2017;26(2):120-28. doi:  
31  
32 818 10.1111/ijpp.12375  
33  
34  
35 819 124. Gidman W, Ward P, McGregor L. Understanding public trust in services provided by community  
36  
37 820 pharmacists relative to those provided by general practitioners: a qualitative study. *BMJ*  
38  
39 821 *open* 2012;2(3):e000939. doi: 10.1136/bmjopen-2012-000939  
40  
41 822 125. McConeghy KW, Wing C. A national examination of pharmacy-based immunization statutes and  
42  
43 823 their association with influenza vaccinations and preventive health. *Vaccine* 2016. doi:  
44  
45 824 10.1016/j.vaccine.2016.04.076  
46  
47  
48 825 126. Cheong MWL, Brock T, Karwa R, et al. COVID-19 and Clinical Pharmacy Worldwide - A Wake Up  
49  
50 826 Call and a Call to Action. *JACCP JAm Coll Clin Pharm* 2020;3(5):860-63. doi:  
51  
52 827 10.1002/jac5.1286  
53  
54  
55 828 127. Adunlin G, Murphy PZ, Manis M. COVID-19: How Can Rural Community Pharmacies Respond to  
56  
57 829 the Outbreak? *J Rural Health* 2020. doi: 10.1111/jrh.12439  
58  
59  
60

- 1  
2  
3 830 128. Aruru M, Truong HA, Clark S. Pharmacy Emergency Preparedness and Response (PEPR): a  
4  
5 831 proposed framework for expanding pharmacy professionals' roles and contributions to  
6  
7 832 emergency preparedness and response during the Covid-19 pandemic and beyond. *Research*  
8  
9 833 *in Social and Administrative Pharmacy* 2020;17(1):1967-77. doi:  
10  
11 834 10.1016/j.sapharm.2020.04.002  
12  
13  
14 835 129. Fiore V. GP referrals under CPCS to go live November 1, NHSE confirms. *Chemist and Druggist*  
15  
16 836 2020. [Available from: [https://www.chemistanddruggist.co.uk/news/-gp-referrals-under-](https://www.chemistanddruggist.co.uk/news/-gp-referrals-under-cpcs-live-november-1-nhse-says)  
17  
18 837 [cpcs-live-november-1-nhse-says](https://www.chemistanddruggist.co.uk/news/-gp-referrals-under-cpcs-live-november-1-nhse-says). Accessed 11/11/20]  
19  
20  
21 838 130. Robinson J. Public Health England to review guidance against the use of rapid COVID-19 tests in  
22  
23 839 community pharmacies. *the Pharmaceutical Journal* 2020;305. doi:  
24  
25 840 10.1211/PJ.2020.20208550  
26  
27  
28 841 131. Buchan SA, Rosella LC, Finkelstein M, et al. Impact of pharmacist administration of influenza  
29  
30 842 vaccines on uptake in Canada. *Canadian Medical Association Journal* 2016;189(4):E146-E52.  
31  
32 843 doi: 10.1503/cmaj.151027  
33  
34 844 132. Calo WA, Shah PD, Gilkey MB, et al. Implementing pharmacy-located HPV vaccination: findings  
35  
36 845 from pilot projects in five U.S. states. *Human Vaccines & Immunotherapeutics* 2019;15(7-  
37  
38 846 8):1831-38. doi: 10.1080/21645515.2019.1602433  
39  
40  
41 847 133. Anderson C, Thornley T. "It's easier in pharmacy": why some patients prefer to pay for flu jabs  
42  
43 848 rather than use the National Health Service. *BMC Health Services Research* 2014;14(1). doi:  
44  
45 849 10.1186/1472-6963-14-35  
46  
47  
48 850 134. Baroy J, Chung D, Frisch R, et al. The impact of pharmacist immunization programs on adult  
49  
50 851 immunization rates: a systematic review and meta-analysis. *Journal of the American*  
51  
52 852 *Pharmacists Association* 2016;56(4):418-26. doi: 10.1016/j.japh.2016.03.006  
53  
54  
55 853 135. Anderson C, Thornley T. Who uses pharmacy for flu vaccinations? Population profiling through a  
56  
57 854 UK pharmacy chain. *International Journal of Clinical Pharmacy* 2016;38(2):218-22. doi:  
58  
59 855 10.1007/s11096-016-0255-z  
60

- 1  
2  
3 856 136. Pharmacy Guild of Australia. 93 per cent of Aussies recognise benefits of flu shot in pharmacy–  
4  
5 857 Pharmacy Guild of Australia [blog]: Pharmacy Guild of Australia 2017. [Available from:  
6  
7 858 [https://www.guild.org.au/news-events/news/2017/93-per-cent-of-aussies-recognise-  
10 859 benefits-of-flu-shot-in-pharmacy](https://www.guild.org.au/news-events/news/2017/93-per-cent-of-aussies-recognise-<br/>8<br/>9 859 benefits-of-flu-shot-in-pharmacy). Accessed 12/12/20]  
11  
12 860 137. Latif A, Tariq S, Abbasi N, et al. Giving Voice to the Medically Under-Served: A Qualitative Co-  
13  
14 861 Production Approach to Explore Patient Medicine Experiences and Improve Services to  
15  
16 862 Marginalized Communities. *Pharmacy (Basel, Switzerland)* 2018;6(1):13. doi:  
17 862 10.3390/pharmacy6010013  
18  
19 863  
20  
21 864 138. Anderson C, Blenkinsopp A, Armstrong M. Feedback from community pharmacy users on the  
22  
23 865 contribution of community pharmacy to improving the public's health: a systematic review  
24  
25 866 of the peer reviewed and non-peer reviewed literature 1990-2002. *Health Expect*  
26 866 2004;7(3):191-202. doi: 10.1111/j.1369-7625.2004.00274.x  
27  
28 867  
29  
30 868 139. Eades CE, Ferguson JS, O'Carroll RE. Public health in community pharmacy: a systematic review  
31  
32 869 of pharmacist and consumer views. *BMC public health* 2011;11:582-82. doi: 10.1186/1471-  
33 870 2458-11-582  
34  
35 870  
36  
37 871 140. Hassell K, Rogers A, Noyce P. Community pharmacy as a primary health and self-care resource:  
38  
39 872 a framework for understanding pharmacy utilization. *Health and Social Care in the*  
40  
41 873 *Community* 2000;8(1):40-49. doi: 10.1046/j.1365-2524.2000.00222.x  
42  
43 874 141. Alkhalili M, Ma J, Grenier S. Defining Roles for Pharmacy Personnel in Disaster Response and  
44  
45 875 Emergency Preparedness. *Disaster Medicine and Public Health Preparedness*  
46 875 2017;11(4):496-504. doi: 10.1017/dmp.2016.172  
47  
48 876  
49  
50 877 142. Ford H, Dallas CE, Harris C. Examining Roles Pharmacists Assume in Disasters: A Content  
51  
52 878 Analytic Approach. *Disaster Medicine and Public Health Preparedness* 2013;7(6):563-72. doi:  
53 878 10.1017/dmp.2013.99  
54  
55 879  
56  
57  
58  
59  
60

- 1  
2  
3 880 143. Schwerzmann J, Graitcer SB, Jester B, et al. Evaluating the Impact of Pharmacies on Pandemic  
4  
5 881 Influenza Vaccine Administration. *Disaster Medicine and Public Health Preparedness*  
6  
7 882 2017;11(5):587-93. doi: 10.1017/dmp.2017.1  
8  
9  
10 883 144. Donald M, King-Shier K, Tsuyuki RT, et al. Patient, family physician and community pharmacist  
11  
12 884 perspectives on expanded pharmacy scope of practice: a qualitative study. *CMAJ Open*  
13  
14 885 2017;5(1):E205-E12. doi: 10.9778/cmajo.20160135  
15  
16 886 145. Mossialos E, Courtin E, Naci H, et al. From “retailers” to health care providers: Transforming the  
17  
18 887 role of community pharmacists in chronic disease management. *Health Policy*  
19  
20 888 2015;119(5):628-39. doi: 10.1016/j.healthpol.2015.02.007  
21  
22  
23 889 146. Mossialos E, Naci H, Courtin E. Expanding the role of community pharmacists: Policymaking in  
24  
25 890 the absence of policy-relevant evidence? *Health Policy* 2013;111(2):135-48. doi:  
26  
27 891 10.1016/j.healthpol.2013.04.003  
28  
29  
30 892 147. Ilardo ML, Speciale A. The Community Pharmacist: Perceived Barriers and Patient-Centered  
31  
32 893 Care Communication. *International Journal of Environmental Research and Public Health*  
33  
34 894 2020;17(2):536. doi: 10.3390/ijerph17020536  
35  
36  
37 895 148. Daly CJ, Quinn B, Mak A, et al. Community Pharmacists’ Perceptions of Patient Care Services  
38  
39 896 within an Enhanced Service Network. *Pharmacy* 2020;8(3):172. doi:  
40  
41 897 10.3390/pharmacy8030172  
42  
43 898 149. Ecartot F, Crepaldi G, Juvin P, et al. Pharmacy-based interventions to increase vaccine uptake:  
44  
45 899 report of a multidisciplinary stakeholders meeting. *BMC Public Health* 2019;19(1) doi:  
46  
47 900 10.1186/s12889-019-8044-y  
48  
49  
50 901 150. Moullin JC, Sabater-Hernández D, Fernandez-Llimos F, et al. Defining professional pharmacy  
51  
52 902 services in community pharmacy. *Research in Social and Administrative Pharmacy*  
53  
54 903 2013;9(6):989-95. doi: 10.1016/j.sapharm.2013.02.005  
55  
56  
57 904 151. NHS England. General practice forward view: NHS England, 2016. [Available from:  
58  
59 905 <https://www.england.nhs.uk/gp/gpfv>. Accessed 12/12/20]  
60

- 1  
2  
3 906 152. Milosavljevic A, Aspden T, Harrison J. Community pharmacist-led interventions and their impact  
4  
5 907 on patients' medication adherence and other health outcomes: a systematic review. *The*  
6  
7 908 *International journal of pharmacy practice* 2018;26(5):387-97. doi: 10.1111/ijpp.12462  
9  
10 909 [published Online First: 2018/06/22]  
11  
12 910 153. Justwan F, Baumgaertner B, Carlisle JE, et al. The effect of trust and proximity on vaccine  
13  
14 911 propensity. *PLOS One* 2019;14(8):e0220658. doi: 10.1371/journal.pone.0220658  
15  
16 912 154. Pharmaceutical Services Negotiating Committee. Preparations for a potential COVID-19  
17  
18 913 vaccination programme.: Pharmaceutical Services Negotiating Committee; 2020 [Available  
19  
20 914 from: [https://psnc.org.uk/our-news/preparations-for-a-potential-covid-19-vaccination-](https://psnc.org.uk/our-news/preparations-for-a-potential-covid-19-vaccination-programme)  
21  
22 915 programme. Accessed 08/11/2020]  
23  
24  
25  
26 916  
27  
28  
29  
30  
31  
32  
33  
34  
35  
36  
37  
38  
39  
40  
41  
42  
43  
44  
45  
46  
47  
48  
49  
50  
51  
52  
53  
54  
55  
56  
57  
58  
59  
60

## Appendix 1 - OVID MEDLINE – Search Strategy

1. exp Coronavirus/ or exp Coronavirus Infections/ or (coronavirus\* or "2019-nCoV" or "2019 ncov" or nCov or "Covid 19" or Covid19 or "SARS CoV 2" or novel coronavirus or novel corona virus or covid\* or "coronavirus 2" or coronavirus infection\* or coronavirus disease or corona virus disease or new coronavirus or new corona virus or new coronaviruses or novel coronaviruses or wuhan).mp. [mp=title, abstract, original title, name of substance word, subject heading word, floating sub-heading word, keyword heading word, organism supplementary concept word, protocol supplementary concept word, rare disease supplementary concept word, unique identifier, synonyms]

2. (Community pharmacy or community pharmacies or community pharmacist or community pharmacists or retail pharmacy or retail pharmacist or retail pharmacists or dispensing chemist or dispensing chemists or (((Pharmacist or pharmacy) and (community or primary care)) or dispensary or apothecary or druggist)).mp. [mp=title, abstract, original title, name of substance word, subject heading word, floating sub-heading word, keyword heading word, organism supplementary concept word, protocol supplementary concept word, rare disease supplementary concept word, unique identifier, synonyms]

3. 1 and 2

*NB. No Date or Language Limits were applied.*

## Appendix 2 - Literature inclusion criteria

Published after January 2003 AND  
COVID-19 or other pandemic or other infectious diseases  
OR vaccination programmes  
OR expanded/extended roles  
AND Community Pharmacy  
AND High- or middle-income country

For peer review only



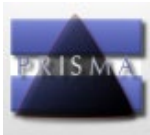

## PRISMA 2009 Flow Diagram

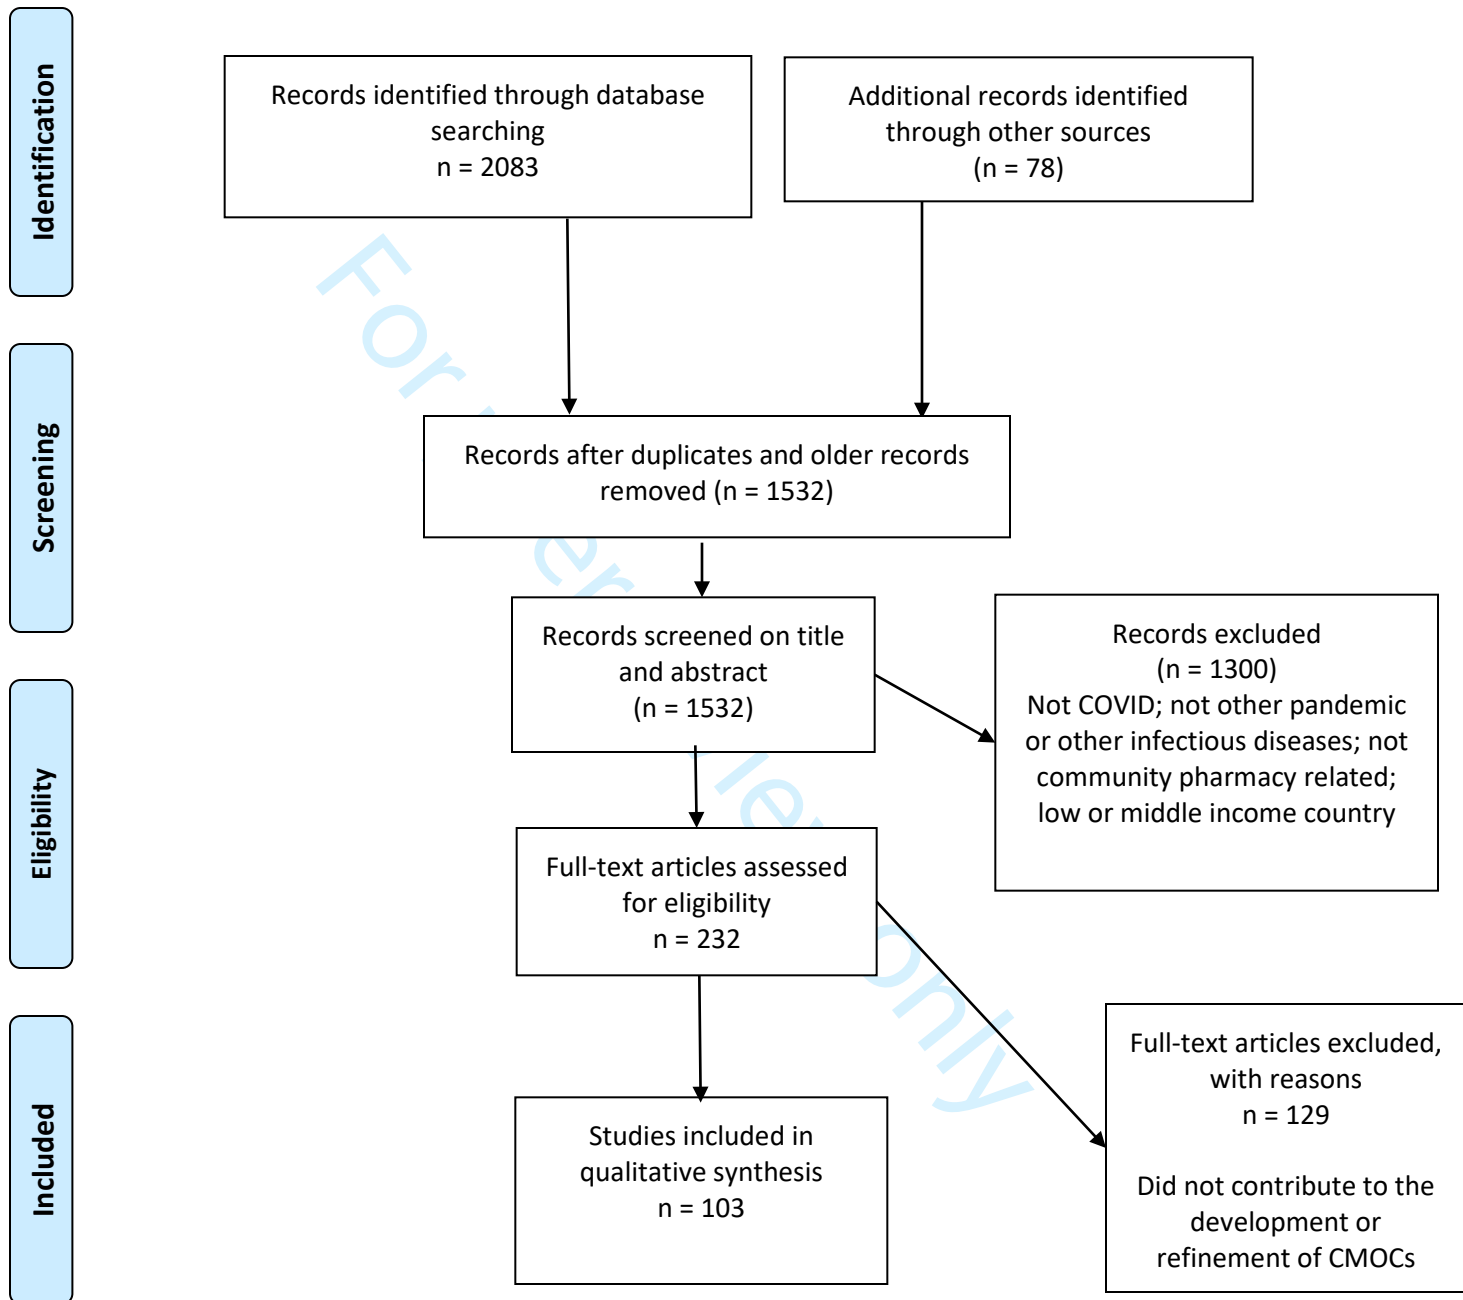

From: Moher D, Liberati A, Tetzlaff J, Altman DG, The PRISMA Group (2009). Preferred Reporting Items for Systematic Reviews and Meta-Analyses: The PRISMA Statement. PLoS Med 6(7): e1000097. doi:10.1371/journal.pmed1000097

For more information, visit [www.prisma-statement.org](http://www.prisma-statement.org).

For peer review only - <http://bmjopen.bmj.com/site/about/guidelines.xhtml>

Appendix 4 - A simplified diagram of the programme theory of a COVID-19 vaccination programme provided by community pharmacies

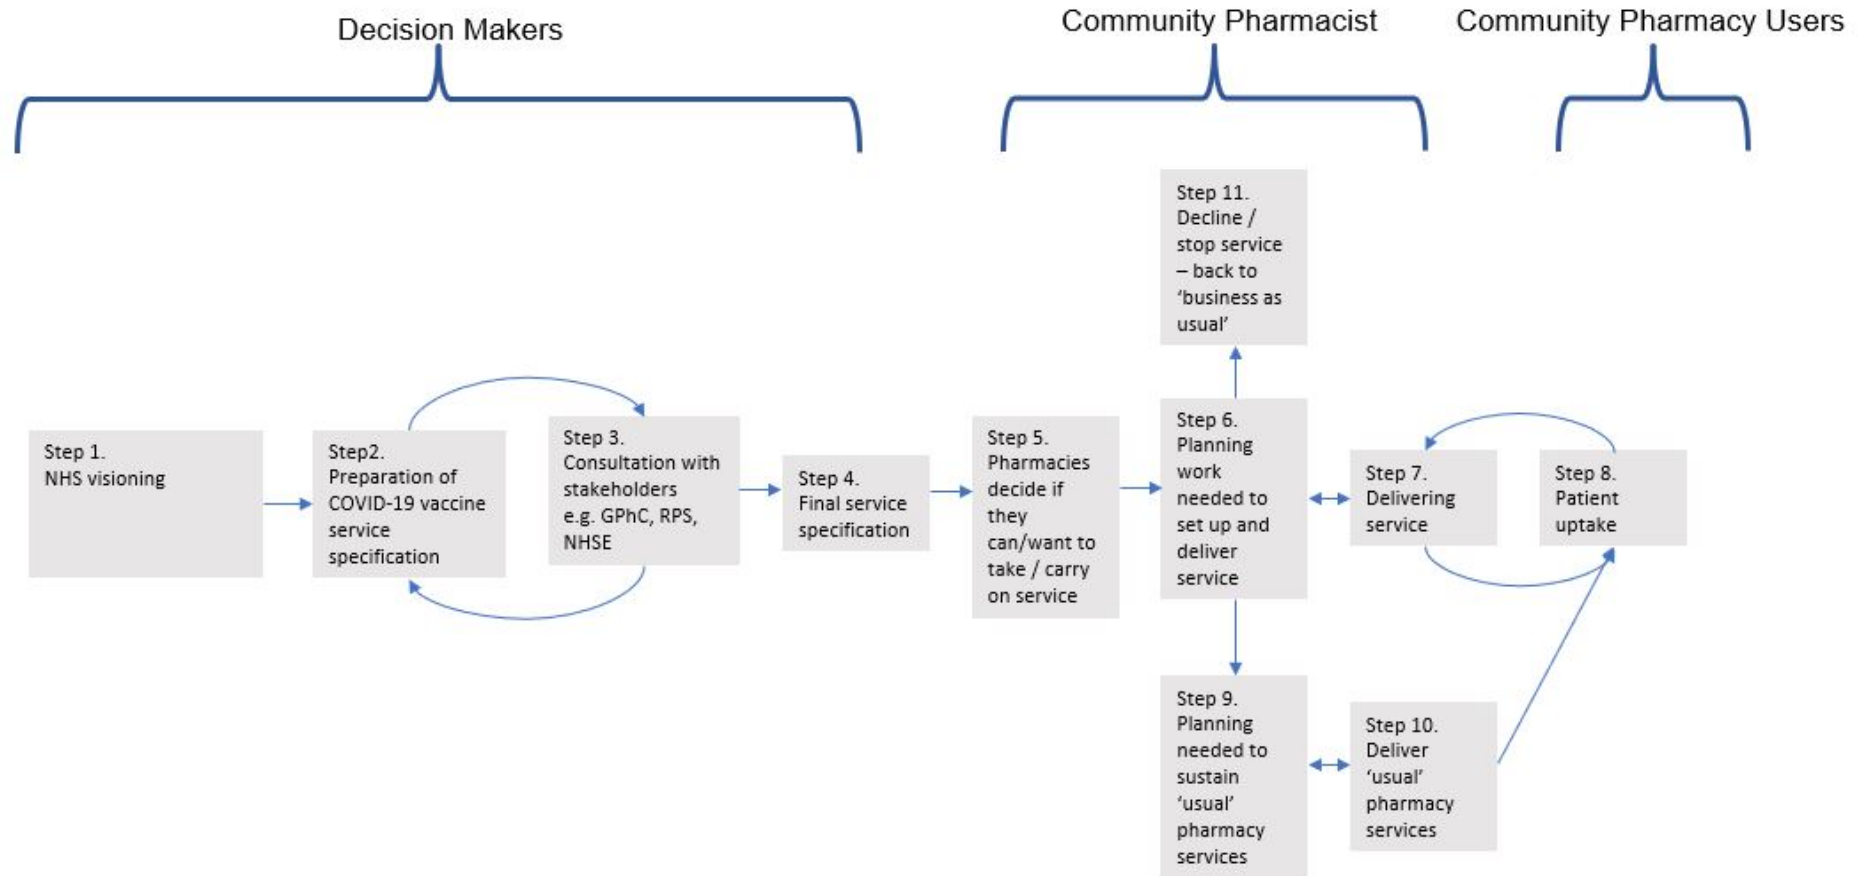

# BMJ Open

## A Rapid Realist Review of the Role of Community Pharmacy in the Public Health Response to COVID-19

|                                 |                                                                                                                                                                                                                                                                                                                                                                                                                                                                                      |
|---------------------------------|--------------------------------------------------------------------------------------------------------------------------------------------------------------------------------------------------------------------------------------------------------------------------------------------------------------------------------------------------------------------------------------------------------------------------------------------------------------------------------------|
| Journal:                        | <i>BMJ Open</i>                                                                                                                                                                                                                                                                                                                                                                                                                                                                      |
| Manuscript ID                   | bmjopen-2021-050043.R2                                                                                                                                                                                                                                                                                                                                                                                                                                                               |
| Article Type:                   | Original research                                                                                                                                                                                                                                                                                                                                                                                                                                                                    |
| Date Submitted by the Author:   | 13-Apr-2021                                                                                                                                                                                                                                                                                                                                                                                                                                                                          |
| Complete List of Authors:       | Maidment, Ian; Aston University<br>Young, Emma; The University of Sheffield<br>MacPhee, Maura; The University of British Columbia<br>Booth, Andrew; The University of Sheffield, School of Health & Related Research (SchARR)<br>Zaman, Hadar; University of Bradford<br>Breen, Juanita; University of Tasmania<br>Hilton, Andrea; University of Hull, FHSC<br>Kelly, Tony; Aston University, PPI Lead on Project<br>Wong, Geoff; University of Oxford, Primary Care Health Sciences |
| <b>Primary Subject Heading</b>: | Health services research                                                                                                                                                                                                                                                                                                                                                                                                                                                             |
| Secondary Subject Heading:      | General practice / Family practice, Infectious diseases                                                                                                                                                                                                                                                                                                                                                                                                                              |
| Keywords:                       | COVID-19, QUALITATIVE RESEARCH, Organisation of health services < HEALTH SERVICES ADMINISTRATION & MANAGEMENT                                                                                                                                                                                                                                                                                                                                                                        |
|                                 |                                                                                                                                                                                                                                                                                                                                                                                                                                                                                      |

SCHOLARONE™  
Manuscripts



I, the Submitting Author has the right to grant and does grant on behalf of all authors of the Work (as defined in the below author licence), an exclusive licence and/or a non-exclusive licence for contributions from authors who are: i) UK Crown employees; ii) where BMJ has agreed a CC-BY licence shall apply, and/or iii) in accordance with the terms applicable for US Federal Government officers or employees acting as part of their official duties; on a worldwide, perpetual, irrevocable, royalty-free basis to BMJ Publishing Group Ltd ("BMJ") its licensees and where the relevant Journal is co-owned by BMJ to the co-owners of the Journal, to publish the Work in this journal and any other BMJ products and to exploit all rights, as set out in our [licence](#).

The Submitting Author accepts and understands that any supply made under these terms is made by BMJ to the Submitting Author unless you are acting as an employee on behalf of your employer or a postgraduate student of an affiliated institution which is paying any applicable article publishing charge ("APC") for Open Access articles. Where the Submitting Author wishes to make the Work available on an Open Access basis (and intends to pay the relevant APC), the terms of reuse of such Open Access shall be governed by a Creative Commons licence – details of these licences and which [Creative Commons](#) licence will apply to this Work are set out in our licence referred to above.

Other than as permitted in any relevant BMJ Author's Self Archiving Policies, I confirm this Work has not been accepted for publication elsewhere, is not being considered for publication elsewhere and does not duplicate material already published. I confirm all authors consent to publication of this Work and authorise the granting of this licence.

1  
2  
3  
4  
5 1 A Rapid Realist Review of the Role of Community Pharmacy in  
6  
7  
8  
9 2 the Public Health Response to COVID-19  
10  
11  
12

13 3 Ian Maidment (corresponding author), Aston University, Birmingham, B4 7ET, UK,  
14  
15 4 [i.maidment@aston.ac.uk](mailto:i.maidment@aston.ac.uk), Phone/fax: 0121-204-3000; Emma Young, University of Sheffield,  
16  
17 5 Sheffield, UK; Maura MacPhee, University of British Columbia, Vancouver, Canada; Andrew Booth,  
18  
19 6 University of Sheffield, Sheffield, UK; Hadar Zaman, University of Bradford, Bradford, UK; Juanita  
20  
21 7 Breen, University of Tasmania, Hobart; Andrea Hilton, University of Hull, Hull, UK; Tony Kelly, PPI  
22  
23 8 Lead (Aston University), Birmingham, UK; Geoff Wong, University of Oxford, Oxford, UK.  
24  
25  
26  
27 9

28  
29 10 Keywords: COVID-19, SARS-CoV-2, Community Pharmacy Services, Vaccination  
30  
31  
32

33 12 Word count: 3,744  
34  
35  
36  
37  
38  
39  
40  
41  
42  
43  
44 16  
45  
46  
47 17  
48  
49  
50  
51  
52  
53  
54  
55  
56  
57  
58  
59  
60

## 18 Abstract

### 19 Introduction

20 Community pharmacists and their teams have remained accessible to the public providing essential  
21 services despite immense pressures during the COVID-19 pandemic. They have successfully  
22 expanded the influenza vaccination programme and are now supporting the delivery of the COVID-  
23 19 vaccination roll-out.

### 24 Aim

25 This rapid realist review aims to understand how community pharmacy can most effectively deliver  
26 essential and advanced services, with a focus on vaccination, during the pandemic and in the future.

### 27 Method

28 An embryonic programme theory was generated using four diverse and complementary documents  
29 along with the expertise of the project team. Academic databases, preprint services and grey  
30 literature were searched and screened for documents meeting our inclusion criteria. The data was  
31 extracted from 103 documents to develop and refine a programme theory using a realist logic of  
32 analysis. Our analysis generated 13 context-mechanism-outcome configurations explaining when,  
33 why and how community pharmacy can support public health vaccination campaigns, maintain  
34 essential services during pandemics, and capitalise on opportunities for expanded, sustainable public  
35 health service roles. The views of stakeholders including pharmacy users, pharmacists, pharmacy  
36 teams and other healthcare professionals were sought throughout to refine the 13 explanatory  
37 configurations.

### 38 Results

39 The 13 context-mechanism-outcome configurations are organised according to decision makers,  
40 community pharmacy teams and community pharmacy users as key actors. Review findings include:

1  
2  
3 41 supporting a clear role for community pharmacies in public health; clarifying pharmacists' legal and  
4  
5 42 professional liabilities; involving pharmacy teams in service specification design; providing suitable  
6  
7 43 guidance, adequate compensation and resources; and leveraging accessible, convenient locations of  
8  
9 44 community pharmacy.

## 12 45 Discussion

13  
14  
15 46 Community pharmacy has been able to offer key services during the pandemic. Decision makers  
16  
17 47 must endorse, articulate and support a clear public health role for community pharmacy. We  
18  
19 48 provide key recommendations for decision makers to optimise such a role during these  
20  
21 49 unprecedented times and in the future.

22  
23  
24  
25 50

## 27 51 Strengths and limitations of this study

28  
29  
30 52 A diverse group of professional and public stakeholders validated our findings from the literature.

31  
32  
33 53

34  
35 54 By using a realist approach, we were to use broad range of data, including grey literature.

36  
37  
38 55

39  
40 56 To enable us to develop recommendations in a timely manner the focus of the review was  
41  
42 57 deliberately narrow.

43  
44  
45 58

46  
47 59 The topic could have been informed by other sources of evidence in particular empirical interviews  
48  
49 60 with key stakeholder.

50  
51  
52 61

53  
54 62 COVID-19 vaccination is a rapidly evolving area and this research was based on the best available  
55  
56 63 evidence at the time.

57  
58  
59 64  
60

1  
2  
3  
4  
5  
6  
7  
8  
9  
10  
11  
12  
13  
14  
15  
16  
17  
18  
19  
20  
21  
22  
23  
24  
25  
26  
27  
28  
29  
30  
31  
32  
33  
34  
35  
36  
37  
38  
39  
40  
41  
42  
43  
44  
45  
46  
47  
48  
49  
50  
51  
52  
53  
54  
55  
56  
57  
58  
59  
60

65

For peer review only



## 66 Introduction

67  
68 Community pharmacy teams have continued to provide essential services during the coronavirus  
69 disease 2019 (COVID-19) pandemic. They offer accessibility and medicines expertise to the public,  
70 even in challenging times.<sup>1 2 3</sup> However, COVID-19 creates extra workload demands, such as  
71 medication dispensing with increases of up to 33% in prescription numbers.<sup>4</sup> To cope with this  
72 demand community pharmacies have increased their opening hours and hired additional staff.<sup>4</sup>  
73 Alongside this additional workload, they have managed widening coverage of the influenza vaccines  
74 programme.<sup>5</sup>

75 Evidence suggests that community pharmacy can successfully provide diverse vaccination services  
76 including seasonal and pandemic influenza, travel vaccinations and hepatitis B for at-risk groups,  
77 within the provisions of the UK National Health Service (NHS) or privately.<sup>6</sup> They have successfully  
78 provided influenza vaccines as an NHS commissioned advanced service since 2015.<sup>5</sup> One service  
79 evaluation found that of 485 patients asked, 99% expressed confidence in their pharmacist to  
80 provide additional vaccinations.<sup>7</sup> Community pharmacy can also support influenza and other  
81 vaccinations to combat the significantly higher COVID-19 related mortality in ethnic minorities  
82 (excluding White minorities).<sup>8 9</sup>

83 The COVID-19 pandemic has stretched NHS capacity to safely and efficiently meet public health  
84 demands. A role for community pharmacy in the national vaccination service requires an  
85 understanding of what pharmacy teams require to successfully deliver essential and advanced  
86 services during the pandemic. Such knowledge is timely, given the roll-out of COVID-19 vaccines  
87 across the community.<sup>10</sup>

88 Delivering a vaccine is a complex process and successful delivery is context-dependent. A realist  
89 review helps make sense of complex situations<sup>11 12</sup>, such as how community pharmacy can most

1  
2  
3 90 effectively address the challenges presented by COVID-19. A rapid review can generate guidance for  
4  
5 91 decision makers to assist with roll-out of COVID-19 vaccinations to community pharmacy. This rapid  
6  
7 92 realist review aimed to understand how community pharmacy can most effectively deliver essential  
8  
9 93 and advanced services, with a focus on vaccination, during the pandemic and in the future.  
10  
11  
12

## 13 94 **Methods**

14  
15  
16 95 A rapid realist review of academic and other literature, supplemented by input from key actors, was  
17  
18 96 undertaken to understand how and when community pharmacy can effectively support the public  
19  
20 97 health agenda during pandemics such as COVID-19. Rapid reviews aim to ensure findings are  
21  
22 98 generated and disseminated in response to the urgent nature of the situation. To produce this  
23  
24 99 knowledge at pace, we truncated the following review processes:

- 25  
26 100 - Programme theory development was undertaken within 1 month with input from the  
27  
28 101 project team.
- 29  
30 102 - Searching was expedited using broad search terms and using a limited number of key data  
31  
32 103 sources.
- 33  
34 104 - Data analysis and context-mechanism-outcome configuration (CMOC) development  
35  
36 105 focussed on where the programme theory was considered most important during COVID-19.

37  
38 106 This realist review was undertaken within six-months (August 2020 - January 2021), the protocol was  
39  
40 107 published on PROSPERO<sup>13</sup> and, where relevant, follows the RAMESES quality and publication  
41  
42 108 standards.<sup>14</sup>  
43  
44  
45  
46  
47  
48  
49

### 50 109 **Stage 1: Programme Theory Development**

51  
52  
53 110 The project team met virtually to develop an embryonic programme theory using four diverse  
54  
55 111 documents from an initial search representing a professional journal<sup>15</sup>, a research journal<sup>16</sup>, a policy  
56  
57 112 document (Royal Pharmaceutical Society)<sup>17</sup> and a practical influenza briefing.<sup>18</sup> The team identified  
58  
59 113 the need for (i) enabling guidance for community pharmacy (to achieve legitimisation)<sup>16</sup>; (ii) practical

1  
2  
3 114 direction for community pharmacy practices (to ensure feasibility)<sup>15 16</sup>; and (iii) user assurance of  
4  
5 115 appropriate, safe, feasible and timely intervention (relative advantage).<sup>15</sup> The resultant embryonic  
6  
7 116 theory, patterned on a COM-B behavioural model of capability, opportunity, and motivation leading  
8  
9  
10 117 to behaviour<sup>19</sup>, was used to inform searching and initial analyses.  
11  
12

## 13 118 Stage 2: Literature Searching

14  
15  
16 119 Searches were conducted (July-August 2020) using MEDLINE, EMBASE, CINAHL, Web of Science, and  
17  
18 120 Scopus for search concepts relating to Pharmacy and COVID by AB (see Appendix 1 for search  
19  
20 121 strategy). Reference checking and citation searching of all included references on Google Scholar  
22  
23 122 (using the Publish or Perish tool) were also carried out. Given the novelty of the virus, we searched  
24  
25 123 the contents of preprint services and the World Health Organisation (WHO) COVID Register. Grey  
26  
27 124 literature searches included social media (e.g. blogs, facilitated Twitter® discussion [#Cpharmchat]),  
28  
29 125 community pharmacy websites, and emails from relevant regulators and professional organisations  
30  
31 126 (e.g., Royal Pharmaceutical Society [RPS], Pharmaceutical Services Negotiation Committee [PSNC],  
32  
33 127 General Pharmaceutical Council [GPhC]).  
34  
35  
36  
37 128 Key inclusion criteria were high or middle-income countries, community pharmacy and infectious  
38  
39 129 disease management (see Appendix 2). The search covered January 2003-July 2020 to include SARS,  
40  
41 130 a comparable condition first identified in 2003. There were no restrictions on study designs eligible  
42  
43  
44 131 for inclusion.  
45  
46

## 47 132 Stage 3: Data Selection and Extraction (selection and coding)

48  
49  
50 133 Selection and appraisal of documents followed a two-step procedure:

51  
52  
53 134 1). EY screened the title, abstract and keywords of potentially relevant documents against inclusion  
54  
55 135 criteria. A 10% random sample was checked by two research team members (AB and MM) for  
56  
57 136 consistency.  
58  
59  
60

1  
2  
3 137 2). EY obtained and screened full texts of all documents meeting the eligibility criteria.  
4  
5

6 138 Relevant data from the included full text documents was coded into NVivo by EY, MM and JB. Some  
7  
8 139 codes came from the data (i.e. inductive coding); others were derived from the programme theory  
9  
10 140 (i.e. deductive coding) and some were derived using retroduction (i.e. by interpretation of what  
11  
12 141 might be functioning as mechanisms).<sup>20</sup> No assessment was made of the rigour of the data within  
13  
14 142 included documents, however global judgements were made of the quality of the explanations  
15  
16 143 provided by the CMOCs and programme theory using the criteria of consilience, simplicity and  
17  
18 144 analogy.<sup>21</sup>  
19  
20  
21  
22

#### 23 145 Stage 4: Data Synthesis

24  
25  
26 146 The data analysis/synthesis was conducted by EY, MM and JB with input from the rest of the project  
27  
28 147 team to develop and refine the programme theory using a realist logic of analysis. Our analysis  
29  
30 148 generated 13 realist CMOCs, explaining when, why and how community pharmacy can support  
31  
32 149 public health vaccination campaigns, maintain essential services during pandemics, and capitalise on  
33  
34 150 opportunities for expanded, sustainable public health service roles. Actor conversations generated  
35  
36 151 further CMOCs related to care for diverse and vulnerable populations, including ethnic minorities.  
37  
38  
39

40 152 Our realist logic of analysis centred on the following questions:  
41  
42

- 43 153 • Interpretation of meaning: Do the contents coded by the team provide data that may be  
44  
45 154 interpreted as CMOCs?
- 46  
47 155 • Interpretations and judgements about CMOCs: How do the CMOCs relate to the programme  
48  
49 156 theory?
- 50  
51 157 • Interpretations and judgements about programme theory: How do the programme theory and  
52  
53 158 its CMOCs correspond with key actor perspectives of reality?  
54  
55  
56  
57  
58  
59  
60

1  
2  
3 159 Data to answer our questions was iteratively sought across documents. Interpretive cross-case  
4  
5 160 comparison was used to identify and to explain the “success” of pandemic community pharmacy  
6  
7 161 interventions delivered in different settings or to different population groups.  
8  
9

## 10 11 162 Key Stakeholders

12  
13  
14 163 Key stakeholders, including community pharmacists and support staff (including representatives  
15  
16 164 from large and smaller chains, sole independent pharmacies and primary care), other healthcare  
17  
18 165 professionals and members of the public were consulted on four occasions. The meetings took place  
19  
20 166 over Microsoft Teams and each lasted about one hour.  
21  
22

## 23 167 Patient and Public Involvement

24  
25  
26 168 Members of the public were drawn from The University of Sheffield’s Patient and Public Involvement  
27  
28 169 database and contacts of the core project team. Groups numbered between 11 and 13 members,  
29  
30 170 with ages ranging from 22 to 74 years, from diverse locations and ethnicities including Black African,  
31  
32 171 Black Caribbean, British Asian, British Chinese, White Irish and White British. Collectively,  
33  
34 172 stakeholders provided feedback and advice on their real-world experience of working in or using  
35  
36 173 community pharmacy.  
37  
38  
39

40 174

## 41 42 43 175 Results

44  
45  
46 176

47  
48 177 103 documents were included in this rapid review and were coded to develop and refine our CMOCs  
49  
50 178 and programme theory (PRISMA diagram in Appendix 3). The final programme theory is summarised  
51  
52 179 in Appendix 4—from abstract visioning to actual patient uptake of the COVID-19 vaccine. Although  
53  
54 180 the programme theory is outlined in a linear fashion, steps within it are not necessarily linear and  
55  
56 181 may occur simultaneously. The CMOCs are organized according to key actors, or individuals and  
57  
58 182 groups with a vested interest in community pharmacy delivery of a COVID-19 vaccination  
59  
60

183 programme. “Actor” derives from sociology and is synonymous with “stakeholder”; we privileged  
 184 this term to differentiate programme theory/CMOC organization from project stakeholder  
 185 participants.<sup>22</sup> Table 1 briefly describes the three actor groups with their respective CMOCs and  
 186 corresponding steps in Appendix 4. Tables 2-4 show the final 13 CMOCs.

187

188 Table 1: Programme Theory Actors with corresponding CMOCs and steps

| Programme<br>Theory Actors                  | Description                                                                                                                                                                                                                                                                                                                                                         | CMOCs*       | Steps in Programme<br>Theory** |
|---------------------------------------------|---------------------------------------------------------------------------------------------------------------------------------------------------------------------------------------------------------------------------------------------------------------------------------------------------------------------------------------------------------------------|--------------|--------------------------------|
| Decision Makers                             | The UK government, regulatory and professional bodies, the public.                                                                                                                                                                                                                                                                                                  | CMOC 1 - 4   | Steps 1 - 4                    |
| Community<br>Pharmacists and<br>their Teams | Community pharmacists are health care professionals registered by the General Pharmaceutical Council and supported by teams made up of counter assistants, dispensers and registered technicians. They work in high street locations, in local communities and in supermarkets. Employers range from large chains to small individually owned community pharmacies. | CMOC 5 – 9   | Steps 5 – 7 and 9 – 11         |
| Pharmacy Users                              | Members of the public who use any community pharmacy services including prescription dispensing, minor ailment advice/treatment or vaccination services.                                                                                                                                                                                                            | CMOC 10 - 13 | Step 8                         |

189

190 \*see Table 2-4

191 \*\*See Appendix 4

192

193 The following sections summarise the CMOCs related to each of the three actor groups. Illustrative  
 194 examples of the supporting evidence from review documents are presented (Tables 2-4).

195

196 *Decision makers*

197 Decision maker and public endorsement (CMOC 1) are essential first steps in enlisting community  
 198 pharmacy for COVID-19 vaccination programmes. Regulators must ensure pharmacists have the  
 199 legal scope to do so (CMOC 2), with community pharmacy input during the development of policies  
 200 and protocols (CMOC 3), so that final service specifications are flexible and do-able within local  
 201 settings (CMOC 4).

202 Table 2 - Decision Makers (CMOCs 1-4)

|                                                                                                      |                                                                                                                                                                                                                                                                                                                                                                                                                                                                                                                                                                                                                                                                                                                                                                                                                                                                                                          |
|------------------------------------------------------------------------------------------------------|----------------------------------------------------------------------------------------------------------------------------------------------------------------------------------------------------------------------------------------------------------------------------------------------------------------------------------------------------------------------------------------------------------------------------------------------------------------------------------------------------------------------------------------------------------------------------------------------------------------------------------------------------------------------------------------------------------------------------------------------------------------------------------------------------------------------------------------------------------------------------------------------------------|
| <p><b>CMOC 1 – Support a public health role<sup>23 24 25</sup></b><br/><br/><small>26-32</small></p> | <p><b>When the government, pharmacy regulators, professional bodies and the public endorse and support a clear role for community pharmacy in public health services (C), community pharmacists will be more likely to adopt vaccination services (O) because they see it as their professional role and duty (M).</b></p> <hr/> <p><i>“Distribution and administration of the COVID-19 vaccination programme will require concerted action across the NHS. With unique insight and expertise in medicines and the delivery of vaccination programmes, pharmacists have a clear role in contributing to the success of this programme.” (Great Britain)<sup>24</sup></i></p> <p><i>“55% of the public have visited a pharmacy during the COVID19 crisis...89% of people believe pharmacies are playing an essential role in the COVID19 crisis.” (UK National Pharmacy Association)<sup>23</sup></i></p> |
|------------------------------------------------------------------------------------------------------|----------------------------------------------------------------------------------------------------------------------------------------------------------------------------------------------------------------------------------------------------------------------------------------------------------------------------------------------------------------------------------------------------------------------------------------------------------------------------------------------------------------------------------------------------------------------------------------------------------------------------------------------------------------------------------------------------------------------------------------------------------------------------------------------------------------------------------------------------------------------------------------------------------|

|                                                                                        |                                                                                                                                                                                                                                                                                                                                                                                                                                                                                                                                                                                                                                                                                                                                                                                                                                                                                                                                                           |
|----------------------------------------------------------------------------------------|-----------------------------------------------------------------------------------------------------------------------------------------------------------------------------------------------------------------------------------------------------------------------------------------------------------------------------------------------------------------------------------------------------------------------------------------------------------------------------------------------------------------------------------------------------------------------------------------------------------------------------------------------------------------------------------------------------------------------------------------------------------------------------------------------------------------------------------------------------------------------------------------------------------------------------------------------------------|
|                                                                                        | <p><i>“Pharmacists...have been called on to coordinate the administration of COVID-19 tests...providing ongoing COVID-19 surveillance to communities by allowing walk-in testing at community pharmacies...[This] might be more sustainable and convenient than the large-scale public screening being done as of the summer of 2020.” (USA)<sup>25</sup></i></p> <p><i>“Given the past success of community pharmacists with increasing annual seasonal influenza uptake and their accessibility, pharmacists will need to be central in administering COVID-19 vaccines in order to achieve rapid population-wide coverage.” (Canada)<sup>26</sup></i></p>                                                                                                                                                                                                                                                                                              |
| <p><b>CMOC 2 –Clarify legal and professional liabilities<sup>24 31 33-40</sup></b></p> | <p><b>When pharmacy regulators and the NHS clarify community pharmacists’ legal and professional liabilities arising from the administration of a novel and potentially unlicensed COVID-19 vaccine (C), community pharmacists are more willing to give the vaccination (O) because they feel reassured regarding liability (M).</b></p> <p><i>“The role of pharmacists in the COVID-19 vaccination programme must be made clear to the pharmacy profession itself. Professional and representative pharmacy bodies have an important role to play in providing the right level of information to the profession to support their roles in the vaccination programme.” (Great Britain)<sup>24</sup></i></p> <p><i>“Indemnity insurance for individual healthcare professionals needs to be amended to cover this activity and be state-funded. There also needs to be clear communication to healthcare professionals, so they clearly understand</i></p> |



|                                                                                                     |                                                                                                                                                                                                                                                                                                                                                                                                                                                                                                                                                                                                        |
|-----------------------------------------------------------------------------------------------------|--------------------------------------------------------------------------------------------------------------------------------------------------------------------------------------------------------------------------------------------------------------------------------------------------------------------------------------------------------------------------------------------------------------------------------------------------------------------------------------------------------------------------------------------------------------------------------------------------------|
|                                                                                                     | <i>that they are covered and under which circumstances this applies.” (Great Britain)<sup>41</sup></i>                                                                                                                                                                                                                                                                                                                                                                                                                                                                                                 |
| <p><b>CMOC 3 – Co-develop feasible service specifications<sup>1 38</sup></b></p> <p>42-48</p>       | <p><b>When COVID-19 vaccination policy and service specifications have been developed with input from diverse community pharmacists and staff tasked with administering and supporting the administration of the vaccine (C), community pharmacies are more likely to deliver the service (O) because they believe the service specification is feasible (M).</b></p> <p><i>“Pharmacists ideally want input into future policy changes before they are finalized, so that these can reflect capacity and preparedness on the ground and be publicized accurately.” (Great Britain)<sup>1</sup></i></p> |
| <p><b>CMOC 4 – Issue clear, relevant and timely guidance<sup>25 27 31 34</sup></b></p> <p>48-62</p> | <p><b>When government, pharmacy regulators and professional bodies provide consistent, clear, relevant, and timely guidance for the delivery of the COVID-19 vaccines (C), community pharmacies are more likely to deliver the service (O), because the guidance is helpful and simplifies implementation (M).</b></p> <p><i>“... it is good to see that NHSE/I have provided the information we have been waiting for to review the resources we have nationwide and decide how we can bring them to bear to help the NHS defeat this virus.” (Great Britain)<sup>49</sup></i></p>                    |

203

204

In England community pharmacies have government contracts and partnerships to deliver

205

vaccinations and other essential services during emergencies, including the COVID-19 pandemic.<sup>25 31</sup>

206

<sup>32</sup> Pharmacies in the USA and Canada have also been identified as having a substantive role in

207

vaccine administration (CMOC1).<sup>25,26</sup> The idea of harnessing UK community pharmacy capacity

208

enjoys widespread public support (CMOC2).<sup>23</sup> However, appropriate service delivery is hampered by

209

unfeasible operational conditions (CMOC3)<sup>1</sup>; for example, medication deliveries are funded by the

210

UK government for “vulnerable people”, but this category of service users is defined narrowly by the

211 government and misunderstood by the public, creating unrealistic expectations of community  
 212 pharmacy and generating additional work.<sup>1</sup>

213 In contrast, when clear options for community pharmacy involvement in COVID-19 vaccination  
 214 programmes were issued through the NHS (CMOC4), the chief executive of the Association of  
 215 Independent Multiple Pharmacies commented positively on members' engagement in delivering  
 216 vaccines.<sup>49</sup>

### 217 *Community Pharmacists and Team*

218 Community pharmacies have had to manage ongoing essential services, in addition to supporting  
 219 COVID vaccination delivery during the pandemic (CMOC6), including delivery of necessary  
 220 medications (CMOC7). Given fears and anxieties related to COVID-19 and changes to service  
 221 delivery, community pharmacies have had to deal with inappropriate behaviours from the public,  
 222 including emotional abuse and threats of physical abuse (CMOC8). As an integral public health  
 223 service, community pharmacy capacity to meet NHS needs will be enhanced through use of IT and  
 224 collaboration with other service providers (CMOC9).

225 Table 3 - Community Pharmacists and Team (CMOCs 5-9)

|                                                                               |                                                                                                                                                                                                                                                                                                         |
|-------------------------------------------------------------------------------|---------------------------------------------------------------------------------------------------------------------------------------------------------------------------------------------------------------------------------------------------------------------------------------------------------|
| <b>CMOC 5 – Receive adequate compensation and resources<sup>1 63-77</sup></b> | <b>When community pharmacies receive adequate compensation and resource support for COVID-19 vaccines (C), they are more likely to deliver the service (O), because they feel recognised for their service contributions (M).</b>                                                                       |
|                                                                               | <i>“Pharmacists...have been incredible in supporting patients throughout COVID-19 and rightly deserve recognition for the work they do. We know that teams were already under pressure and that colleagues in community pharmacy are feeling added financial strain.” (Great Britain).<sup>63</sup></i> |

|                                                                                                                 |                                                                                                                                                                                                                                                                                                                                                                                                                                                                                                                                                                                                                                     |
|-----------------------------------------------------------------------------------------------------------------|-------------------------------------------------------------------------------------------------------------------------------------------------------------------------------------------------------------------------------------------------------------------------------------------------------------------------------------------------------------------------------------------------------------------------------------------------------------------------------------------------------------------------------------------------------------------------------------------------------------------------------------|
|                                                                                                                 | <p><i>“In the community, mitigating the impact of COVID-19 has...focused largely on general practitioners (GPs). This is unsurprising to those in the pharmacy profession who have long considered policy makers to overlook them.” (Great Britain)<sup>1</sup></i></p>                                                                                                                                                                                                                                                                                                                                                             |
| <p><b>CMOC 6 – Sustain capacity and facility to adapt essential services</b><sup>16 17 30 34 68 70 71</sup></p> | <p><b>When a community pharmacy has the capacity and permission to manage and adapt existing essential services during COVID-19 (C), they are more likely to effectively deliver and sustain these services (O) because it’s feasible for them to do so (M).</b></p>                                                                                                                                                                                                                                                                                                                                                                |
| <p>78-91 92</p>                                                                                                 | <p><i>“Virtual and telephone consultations have become commonplace, particularly to vulnerable patients. Pharmacists have implemented systems to dispense medications in advance of need to minimise wait times and duplicate visits. In case-by-case examples...there has been anticipatory management of medication-related needs.” (Ireland)<sup>92</sup></i></p> <p><i>“Pharmacists who had comfort and confidence in managing electronic communication reported feeling greater control over workflow and the ability to triage and queue patients more effectively based on priority and need.” (Canada)<sup>60</sup></i></p> |
| <p><b>CMOC 7 – Inform users of essential service availability/continuity</b></p>                                | <p><b>When community pharmacies have processes in place to inform pharmacy users about the availability of essential services (C), pharmacy users are less likely to become anxious (O), because they feel reassured about access to what they need (M).</b></p>                                                                                                                                                                                                                                                                                                                                                                    |

|                                                                                                    |                                                                                                                                                                                                                                                                                                                                                                                                                                                                                                                                                                                                                                                                                                                                                                                                                                                                                                                                                                                                                                                                                                                                                                                                                                                                                                                                        |
|----------------------------------------------------------------------------------------------------|----------------------------------------------------------------------------------------------------------------------------------------------------------------------------------------------------------------------------------------------------------------------------------------------------------------------------------------------------------------------------------------------------------------------------------------------------------------------------------------------------------------------------------------------------------------------------------------------------------------------------------------------------------------------------------------------------------------------------------------------------------------------------------------------------------------------------------------------------------------------------------------------------------------------------------------------------------------------------------------------------------------------------------------------------------------------------------------------------------------------------------------------------------------------------------------------------------------------------------------------------------------------------------------------------------------------------------------|
| <p>92 16 28 31 32 51 60 65 71 80 81</p> <p>85 93-101</p>                                           | <p><i>“Access to medications is a main concern expressed by our patients... The CDC and SAMHSA offer guidance on ways to reduce stress and anxiety in this time of uncertainty.”<sup>95</sup></i></p> <p><i>“As a result of the power dynamics at play, it is ultimately up to pharmacists to be able to reassure patients and provide care, all while taking into account their mental health. Currently, guidelines regarding patient interaction during a pandemic are needed”.<sup>51</sup></i></p> <p><i>“In addition, there is ongoing work in liaison with pharmacists, general practitioners, and state and territory authorities to enable therapeutic substitution by pharmacists in the event of a shortage. This will allow community pharmacists to substitute dose strength or form without prior approval from the prescriber, if a prescribed medicine is not available at the time of dispensing. These measures highlight the important role pharmacists can play in enabling and maintaining access to medicines for people in need throughout the COVID-19 outbreak.” (Australia)<sup>85</sup></i></p> <p><i>“Access to medications is a main concern expressed by our patients... The CDC and SAMHSA offer guidance on ways to reduce stress and anxiety in this time of uncertainty.” (USA)<sup>95</sup></i></p> |
| <p><b>CMOC 8 – Protect the health and safety of staff</b> <sup>24 31 51 71 77 81 102-108</sup></p> | <p><b>When community pharmacies have the means to protect the health of pharmacists and staff (C), they are more likely to deliver essential services and COVID-19 vaccination services (O), because they feel safe to do so (M).</b></p>                                                                                                                                                                                                                                                                                                                                                                                                                                                                                                                                                                                                                                                                                                                                                                                                                                                                                                                                                                                                                                                                                              |

|                                                                                                                                                 |                                                                                                                                                                                                                                                                                                                                                                                                                                                                                                                                                                                                                                                                                                                                                                                                                                                                                                                                                                                                                                                                                                                    |
|-------------------------------------------------------------------------------------------------------------------------------------------------|--------------------------------------------------------------------------------------------------------------------------------------------------------------------------------------------------------------------------------------------------------------------------------------------------------------------------------------------------------------------------------------------------------------------------------------------------------------------------------------------------------------------------------------------------------------------------------------------------------------------------------------------------------------------------------------------------------------------------------------------------------------------------------------------------------------------------------------------------------------------------------------------------------------------------------------------------------------------------------------------------------------------------------------------------------------------------------------------------------------------|
|                                                                                                                                                 | <p>“...Given high levels of public anxiety and uncertainty regarding the integrity of the drug supply chain in Canada, many participants reported difficult, sometimes frightening, interactions with members of the public and their desire for dedicated security to provide support and conflict management” (Canada).<sup>31</sup></p> <p>“An additional burden Asian pharmacists face, on top of pharmacist harassment, is the rise of anti-Asian racism that has come about due to COVID-19. Verbal and even physical abuse has been reported to happen in various countries, such as the UK, France, and the USA, to those of Chinese descent...” (UK, France, USA)<sup>51</sup></p> <p>“The survey found that although more than a third (37%) of pharmacists said they felt unsafe at some point working during the pandemic, concerns over PPE have eased. This is due, in part, to the supply problems being eased and community pharmacists being finally allowed to order from the national online PPE portal in an emergency, after calls for access from the RPS.” (Great Britain)<sup>77</sup></p> |
| <p><b>CMOC 9 – Enhance collaboration across services, including IT<sup>18</sup></b><br/><br/><small>26 47 56 57 69 78 80 85 109-114</small></p> | <p><b>When systems needed for COVID-19 vaccination, including IT and remuneration, support collaboration by various service providers (e.g. general practitioner surgeries and community pharmacies: (C), a coordinated response is more likely (O), because reduced effort is needed from everyone (M).</b></p>                                                                                                                                                                                                                                                                                                                                                                                                                                                                                                                                                                                                                                                                                                                                                                                                   |

1  
2  
3  
4  
5  
6  
7  
8  
9  
10  
11  
12  
13  
14  
15  
16  
17  
18  
19  
20  
21  
22  
23  
24  
25  
26  
27  
28  
29  
30  
31  
32  
33  
34

*“Planning and delivery should be undertaken across a consistent, pre-agreed footprint. It may be more efficient and cost effective to provide immunisation across a number of providers, pooling resources and sites to deliver the best service possible, and working in coordination with other local stakeholders such as directors of public health and local government.” (Great Britain)<sup>47</sup>*

35  
36  
37  
38  
39  
40  
41  
42  
43  
44  
45  
46  
47  
48  
49  
50  
51  
52  
53  
54  
55  
56  
57  
58  
59  
60

*“For many community pharmacists, a lack of connected IT is a huge problem. Kieran Eason, who runs an independent pharmacy in Tamworth, Staffordshire, says lack of intra-operability makes it more difficult to do relatively simple things, like sending prescription requests to GPs. “Pharmacy IT is just a complete disaster,” he says, suggesting the COVID-19 crisis has highlighted flaws, such as the number of different systems pharmacists use.” (Great Britain)<sup>69</sup>*

226

227 Although attention is focused on a COVID-19 vaccine, community pharmacies offer diverse essential  
228 services. In the UK and other high-income countries, community pharmacy services also provide  
229 advanced services such as vaccinations.<sup>115</sup> Pharmacists consider it a professional responsibility to  
230 provide essential services during the pandemic, despite clear financial risks to themselves.<sup>63</sup>

231 Despite pharmacists’ professional and moral obligations to provide essential services, ongoing  
232 persistent ‘under-recognition’ can jeopardize their ability to contribute to COVID-19 vaccinations  
233 (CMOC5) as well as maintain a usual service. Under-recognition has been an issue in previous UK  
234 vaccination campaigns; respondents to a survey of Welsh community pharmacists after the 2016  
235 influenza season described providing a “mop up” service for general practitioners (GPs).<sup>59 68</sup>

1  
2  
3 236 Multiple required community pharmacy service adaptations have been reported by the UK  
4  
5 237 Pharmaceutical Journal, including changeover in retail space to medication preparation and  
6  
7 238 dispensing, and call-in shopping services for other retail items (CMOC6). Service adaptations have  
8  
9 239 been affected by hours of operation, available staff, and cancellations of contracted services, such as  
10  
11 240 blood pressure testing and smoking cessation support—all with financial implications for  
12  
13 241 pharmacists.<sup>80</sup>

14  
15  
16  
17 242 Before COVID-19, community pharmacies globally were offering “valued-added services” (VAS) such  
18  
19 243 as drive-thru services, online ordering and communications services (e.g., prescription reminders) to  
20  
21 244 stay competitive. Many VAS services have helped pharmacies adapt more quickly to pandemic  
22  
23 245 restrictions.<sup>81</sup>

24  
25  
26  
27 246 During the pandemic, ensuring access to needed medications has been a critical pharmacy service,  
28  
29 247 to allay public concerns (CMOC7).<sup>16</sup> Potential and actual disruptions in expected services and needed  
30  
31 248 supplies (e.g., medications) have resulted in tensions, threats and verbal/physical abuse by the  
32  
33 249 public to community pharmacists (CMOC 8).<sup>51 80 116</sup> Safety policies, protocols and safety-related  
34  
35 250 supplies (e.g., PPEs) must in place to ensure community pharmacy teams’ safety.<sup>80</sup>

36  
37  
38  
39 251 The UK COVID-19 vaccination campaign borrows heavily from previous, successful collaborative  
40  
41 252 influenza vaccination programmes using community pharmacy and GPs (CMOC9).<sup>48</sup> Pooling  
42  
43 253 resources improves service delivery.<sup>117</sup> For example, the UK Pharmaceutical Journal reported how a  
44  
45 254 greater collaborative approach has resulted in successful influenza vaccination of home care staff  
46  
47 255 and domiciliary workers during the pandemic.<sup>117</sup>

48  
49  
50 256 The pandemic has clearly demonstrated the importance of interoperable, connected IT systems  
51  
52 257 across services.<sup>118</sup> Getting access to reliable information is important for tracking supplies and  
53  
54 258 deliveries related to the COVID-19 vaccination programme.<sup>69</sup> A pandemic silver lining is raised  
55  
56 259 awareness of IT functions for enhanced delivery of essential services (e.g., medication planning,  
57  
58  
59  
60

1  
2  
3 260 prescribing and dispensing between pharmacies and GPs) and advanced services, including  
4  
5 261 vaccinations.<sup>69</sup>  
6  
7

8  
9 262 *Pharmacy Users*

10  
11 263 Pharmacy users trust community pharmacies as a reliable source of information (CMOC10) about  
12  
13 264 vaccines, and pharmacies' local accessibility and convenience increases the likelihood of users  
14  
15 265 obtaining COVID-19 vaccines through them (CMOC11). Community pharmacy relationships with  
16  
17 266 vulnerable populations in their local settings may enhance uptake of the vaccine by these groups  
18  
19  
20 267 (CMOC12). Provision for privacy is an important user consideration. Pharmacy users expect private  
21  
22 268 consultations to preserve their confidentiality (CMOC13).  
23  
24  
25 269



270 Table 4 - Pharmacy Users (CMOCs 10-13)

271

|                                                                                                                                        |                                                                                                                                                                                                                                                                                                                                                                                                                                                                                                                                                                                                                                                                                                                                                                                                                              |
|----------------------------------------------------------------------------------------------------------------------------------------|------------------------------------------------------------------------------------------------------------------------------------------------------------------------------------------------------------------------------------------------------------------------------------------------------------------------------------------------------------------------------------------------------------------------------------------------------------------------------------------------------------------------------------------------------------------------------------------------------------------------------------------------------------------------------------------------------------------------------------------------------------------------------------------------------------------------------|
| <p><b>COMC 10 – Trust the pharmacist as reliable information source</b><sup>32 53 119-122</sup></p>                                    | <p><b>When pharmacy users receive information about the COVID-19 vaccine from their community pharmacy (C), they are more likely to get the vaccine (O), because they trust community pharmacy as a source of reliable, accurate information (M).</b></p> <p><i>“When patients were educated about influenza, herpes zoster, and pneumococcal vaccines as a result of a pharmacist-driven intervention in community pharmacies, they were influenced to receive the vaccination.” (USA)<sup>119</sup></i></p> <p><i>“Being able to address the public enquiries with accurate up-to-date information about the local situation and the overall infection progress is the key to build trustful relationship with them at troubled times.” (Macau)<sup>32</sup></i></p>                                                       |
| <p><b>CMOC 11 – Trust the pharmacist to deliver responsive services</b><sup>7 18 23 26 34 37 43 51 54 59 63 70 84 85 123-135</sup></p> | <p><b>When community pharmacies are trusted to make necessary service adaptations to ensure services are flexible, convenient and accessible (C), COVID-19 vaccine uptake is likely to be higher among pharmacy users (O) because the service is responsive to local needs (M).</b></p> <p><i>“Pharmacists have always been the most accessible health care provider; this is especially true in the era of COVID-19.... While other professionals have closed their doors to patients, community pharmacies remained open to the public despite stricter lockdown restrictions. As highly trusted healthcare clinicians, community pharmacists play a vital role in closing the gaps that are exacerbated by the additional strain on the system and reduced access to healthcare providers.” (Canada)<sup>51</sup></i></p> |

|                                                                                                                  |                                                                                                                                                                                                                                                                                                                                                                                                                                                                                                                                                                                                                                                                                                                                                                                                                                                                                                                                                                                                                                                                                                                                                                                         |
|------------------------------------------------------------------------------------------------------------------|-----------------------------------------------------------------------------------------------------------------------------------------------------------------------------------------------------------------------------------------------------------------------------------------------------------------------------------------------------------------------------------------------------------------------------------------------------------------------------------------------------------------------------------------------------------------------------------------------------------------------------------------------------------------------------------------------------------------------------------------------------------------------------------------------------------------------------------------------------------------------------------------------------------------------------------------------------------------------------------------------------------------------------------------------------------------------------------------------------------------------------------------------------------------------------------------|
|                                                                                                                  | <p><i>“Pharmacy flu vaccination services complement those provided by general practitioners to help improve overall coverage and vaccination rates for patients in at-risk groups. These services are highly accessed by patients from all socio demographic areas, and seem to be particularly attractive to carers, frontline healthcare workers, and those of working age.” (Great Britain)<sup>135</sup></i></p>                                                                                                                                                                                                                                                                                                                                                                                                                                                                                                                                                                                                                                                                                                                                                                    |
| <p><b>CMOC 12 –</b></p> <p><b>Access culturally-sensitive services</b></p> <p><small>27 78 80 92 136</small></p> | <p><b>When community pharmacies leverage their community location and community-staff relationships (C), vulnerable populations, such as ethnic minorities, are more likely to use their services, including COVID-19 vaccination services (O), because they trust their local community pharmacies to provide culturally sensitive service. (M)</b></p> <p>“Research continues to highlight that patients who are medically underserved have poorer inequitable access to health care due to them experiencing greater physical barriers to accessibility, encountering poorer patient-professional communication and are significantly disadvantaged where a service is not tailored to their unique needs or preferences.” (Great Britain)<sup>137</sup></p> <p><i>“I think over the years what’s happened is nationally it’s almost like everything has to be the same, which then doesn’t work because it doesn’t accommodate all the little variations...So we need to go back and in each individual pharmacy, gear it towards the population that it is meant to be meeting the needs of” (Pharmacist caring for ethnic minority community-Great Britain)<sup>137</sup></i></p> |

|                                                                                                                      |                                                                                                                                                                                                                                                                                                                                                                                                                                                                                                                                                                                                                                                                                                                                        |
|----------------------------------------------------------------------------------------------------------------------|----------------------------------------------------------------------------------------------------------------------------------------------------------------------------------------------------------------------------------------------------------------------------------------------------------------------------------------------------------------------------------------------------------------------------------------------------------------------------------------------------------------------------------------------------------------------------------------------------------------------------------------------------------------------------------------------------------------------------------------|
| <p><b>CMOC 13 –</b></p> <p><b>Receive private and confidential services<sup>7 50 65 129</sup></b></p> <p>138-140</p> | <p><b>When community pharmacies make provisions for privacy (C), pharmacy users are more likely to use their services (O), because they are reassured about confidentiality (M).</b></p> <p><i>“If there was something not right...the first thing I would do is make an appointment with a doctor. I wouldn’t do and talk to somebody over a pharmacy counter.” (Great Britain)<sup>65</sup></i></p> <p><i>“Privacy, confidentiality and dignity are all vital elements of a trusting relationship between healthcare professionals and their patients.... In terms of privacy, the quality was perceived by the participants to include a confidential room that enabled private consultations.” (Great Britain)<sup>7</sup></i></p> |
|----------------------------------------------------------------------------------------------------------------------|----------------------------------------------------------------------------------------------------------------------------------------------------------------------------------------------------------------------------------------------------------------------------------------------------------------------------------------------------------------------------------------------------------------------------------------------------------------------------------------------------------------------------------------------------------------------------------------------------------------------------------------------------------------------------------------------------------------------------------------|

272

273 Public trust in community pharmacists is high—similar to doctors and nurses.<sup>38</sup> Trust between  
 274 pharmacists and users can be leveraged to overcome scepticism about the COVID-19 vaccine.  
 275 Providing reliable information about the disease and the vaccine, as pharmacies have done with  
 276 other infections, can enhance public uptake of the COVID-19 vaccine.<sup>113</sup> In the USA, 90% of the US  
 277 population lives within 5 miles of a community pharmacy. Given their convenience and accessibility,  
 278 consumers have visited their community pharmacists 12 times more frequently than their GPs.<sup>21</sup> A  
 279 UK study found that consumers who were eligible for a free influenza vaccine through their GPs  
 280 were willing to pay for pharmacy service because of convenience and ease of access.<sup>127</sup> Established,  
 281 trusting relationships are especially important for providing culturally sensitive services to  
 282 marginalized and vulnerable communities.<sup>129</sup> Community pharmacists, often members of local  
 283 communities are specially positioned to understand the culturally contextual factors that impact  
 284 their pharmacy users.<sup>89</sup> Trusting relationships are founded on privacy, confidentiality and dignity,

1  
2  
3 285 and COVID-19, public health protocols and limited space must be considered—in order to maintain  
4  
5 286 vital trust among pharmacy users.<sup>65</sup>  
6  
7

## 8 287 Discussion

9  
10  
11  
12 288 This realist review sought to understand how community pharmacy can contribute to the public  
13  
14 289 health agenda during the COVID-19 pandemic, particularly continuation of essential services and  
15  
16 290 engagement in vaccination services.<sup>115</sup> As the COVID-19 vaccination service continues to evolve, our  
17  
18 291 recommendations for decision makers highlight opportunities for community pharmacy to promote  
19  
20 292 safe, efficient and effective service delivery.  
21  
22

23 293

## 24 294 Summary of key Findings

25  
26  
27  
28  
29 295 To optimise community pharmacy service during the pandemic, decision makers must endorse and  
30  
31 296 articulate a clear role for these healthcare professionals. The public already endorses advanced roles  
32  
33 297 for community pharmacy (e.g., vaccinations, minor ailment scheme), but public awareness depends  
34  
35 298 on what decision makers do and say. Practical decision maker measures include adequate  
36  
37 299 reimbursement to help cover the cost for time, staff and PPE (particularly for a sustainable long-term  
38  
39 300 service); legal (including indemnity), regulatory coverage for advanced roles; and clear and  
40  
41 301 consistent guidance for vaccination preparation and for adaptation of essential services. When given  
42  
43 302 the opportunity, the permissions and resources to do so, community pharmacies have been able to  
44  
45 303 adapt quickly to continue essential services and whenever possible, to offer critical advanced  
46  
47 304 services. Historically, community pharmacies have significantly increased vaccination uptake (e.g.,  
48  
49 305 influenza vaccinations) given their accessibility and convenience and capacity to adapt to local needs  
50  
51 306 for the general population and marginalized groups.  
52  
53  
54  
55

56 307  
57  
58  
59  
60

1  
2  
3  
4 308 Compare to other similar or related studies discussing important differences in  
5  
6  
7 309 results  
8  
9

10 310 At the time of this realist review, there were no similar reviews on community pharmacy roles with  
11  
12 311 respect to COVID-19 vaccinations. COVID-19 represents an unprecedented situation with limited  
13  
14 312 direct evidence to guide decision-making. However, realist approaches engage with a wider evidence  
15  
16 313 base, including research on past pandemics (e.g., SARS)<sup>60 141 142</sup>, mass vaccination campaigns (e.g.,  
17  
18 314 influenza)<sup>143</sup>, and community pharmacies' capacity pre-COVID-19 to deliver essential and advanced  
19  
20 315 services.<sup>19 144 145</sup> Key factors previously include a lack of leadership, a lack of guidance and an  
21  
22 316 increasing reliance on professional judgement and experience.<sup>60</sup> Research from the UK and other  
23  
24 317 economically developed countries supports the 13 CMOCs and decision maker recommendations in  
25  
26 318 this review (see tables 2-4 and table 5). However, limitations continue to surround the direct policy  
27  
28 319 relevance of much of the community pharmacy evidence base.<sup>146</sup>  
29  
30  
31  
32  
33  
34

35 321 Study strengths and limitations  
36  
37

38 322 The realist approach uses diverse data, including grey literature. This feature is especially important  
39  
40 323 given a novel and rapidly evolving topic area, such as COVID-19. Multiple researchers with subject  
41  
42 324 matter expertise participated in screening the literature and extracting and coding data, which  
43  
44 325 maximised opportunities to discuss and debate the plausibility of the inferences made. The CMOCs  
45  
46 326 were developed and refined through regular discussions within a team with varied academic and  
47  
48 327 clinical backgrounds. Professional and public stakeholder consultation further refined the CMOCs.  
49  
50  
51  
52 328 All rapid reviews operationalise coverage versus expediency. Other sources of evidence could have  
53  
54 329 informed the review; however, potential gaps were mitigated by stakeholder engagement and  
55  
56 330 expertise within the team. The evidence supporting the CMOCs was based on available time for  
57  
58 331 document review, and during the review period, research, directives and policy related to COVID-19  
59  
60

1  
2  
3 332 vaccination rapidly evolved. The programme theory and its CMOCs, however, are expressed in such  
4  
5 333 a way that they can be further confirmed, refuted or refined in the future using additional data.  
6  
7

8 334 For this rapid review, given our short timeline of six months, we initially decided to focus on  
9  
10 335 community pharmacy roles and pandemic response in middle to high-income countries. Whilst we  
11  
12 336 identified data from higher-income countries such as Canada, USA, Australia and France, there was  
13  
14 337 very little published from middle-income countries. As such, it is likely that our findings and  
15  
16 338 recommendations are most applicable to high-income countries, although, the lessons learned from  
17  
18 339 high-income countries can serve as an initial reference point for best practice for other countries.  
19  
20  
21

22 340  
23  
24 341 Our recommendations can be viewed as "how tos" for other countries to consider within their own  
25  
26 342 cultural and healthcare environments. A number of European and North American countries have  
27  
28 343 introduced legislative changes to extend the role of community pharmacy and thus reduce pressure  
29  
30 344 on other parts of their healthcare systems.<sup>145 147</sup> Our findings can be used by community pharmacy  
31  
32 345 and decision makers, from countries other than the UK, when mapping out similar services  
33  
34 346 particularly in the context of changes in the legislation.  
35  
36  
37

38 347  
39  
40  
41 348 **Meaning of the study: possible explanations and implications for decision makers**  
42  
43

44 349 Although there are multiple actors involved in pandemic response, for brevity, recommendations  
45  
46 350 (Table 5) are directed towards decision makers who possess the formal authority to implement the  
47  
48 351 recommendations.  
49

50  
51 352  
52  
53 353 Table 5 - Recommendations for Decision Makers to Increase Community Pharmacy Engagement in  
54  
55 354 Pandemic Response (for further details check:  
56  
57 355 [https://publications.aston.ac.uk/id/eprint/42310/1/Guidance\\_for\\_Policy\\_Makers\\_on\\_the\\_role\\_of\\_C](https://publications.aston.ac.uk/id/eprint/42310/1/Guidance_for_Policy_Makers_on_the_role_of_Community_Pharmacy_in_COVID.pdf)  
58  
59 356 [ommunity\\_Pharmacy\\_in\\_COVID.pdf](https://publications.aston.ac.uk/id/eprint/42310/1/Guidance_for_Policy_Makers_on_the_role_of_Community_Pharmacy_in_COVID.pdf)).  
60

| Recommendations                                                                                                                                             | Derived from CMOC |
|-------------------------------------------------------------------------------------------------------------------------------------------------------------|-------------------|
| Articulate a clear public health agenda role for community pharmacy (e.g., COVID-19 testing and vaccination)                                                | 1                 |
| Ensure pharmacy regulations for advanced roles, such as novel vaccine administration, are in place to legally protect community pharmacists and their teams | 2                 |
| Involve local community pharmacies in policy and service specification development                                                                          | 3                 |
| Provide timely guidance with sufficient details for community pharmacies to quickly adapt to local needs                                                    | 4                 |
| Provide adequate funding and reimbursement for community pharmacy services to deliver COVID-19 vaccines                                                     | 5                 |
| Equip community pharmacies with the necessary permissions to manage and adapt essential services                                                            | 6                 |
| Ensure community pharmacies have the means to adequately protect the health of themselves, their staff and pharmacy users                                   | 8                 |
| Facilitate collaboration and coordination of COVID-19 vaccination services across providers (e.g., GPs, community pharmacies) and systems (e.g., IT)        | 9                 |

357

358 As the CMOCs were refined, ‘tensions’ were uncovered with implications for decision makers,

359 particularly: community pharmacists as healthcare professionals versus retailers<sup>43 106 145 148</sup>;

360 community pharmacies’ capacity to remain financially viable while managing essential and advanced

361 services.<sup>19 149 150</sup> and; pharmacists’ capacity to provide off-site services while maintaining physical

362 premises.<sup>151</sup> These tensions stem from lack of awareness of community pharmacists as healthcare

363 professionals.

1  
2  
3 364  
4  
5 365 Along the continuum of healthcare from community to hospital, community pharmacy is often the  
6  
7 366 first point of contact for the public. Community pharmacies contribute to primary care services  
8  
9  
10 367 through essential services (e.g., medication dispensing) and expanded roles (e.g., vaccinations),<sup>115 148</sup>  
11  
12 368 often decreasing workload pressures on other providers, such as GPs.<sup>152</sup> Public surveys demonstrate  
13  
14 369 high levels of satisfaction with community pharmacy services, and vaccination uptake is increased  
15  
16 370 when pharmacies deliver these services.<sup>150</sup> Nevertheless, lack of public and decision maker  
17  
18 371 awareness of community pharmacy primary care roles has slowed uptake and integration of these  
19  
20 372 services.<sup>121</sup> A recent UK public survey found that community pharmacies are seen as “a medicine  
21  
22 373 supply shop by 48.3% of people, as a place to purchase medicines by 22%, and a place to purchase  
23  
24 374 non-medicinal products by 17.7%.”<sup>28</sup>

25  
26  
27  
28 375  
29  
30 376 In Ireland and Canada community pharmacies are an integral part of national vaccination  
31  
32 377 campaigns.<sup>150</sup> In both instances, community pharmacists participate in vaccination planning,  
33  
34 378 pharmacy regulators provide clear guidance on vaccination management, and vaccinations are  
35  
36 379 equitably refunded through public health systems. The removal of barriers, such as economic  
37  
38 380 pressures on pharmacies has resulted in impressive national vaccine uptake, even in large countries,  
39  
40 381 such as Canada.<sup>150</sup> Globally, there is an emerging trend for governments, health insurance companies  
41  
42 382 and consumers to remunerate community pharmacies for services that contribute to improved  
43  
44 383 health outcomes.<sup>151</sup>

45  
46 384  
47  
48 385 Community pharmacies tend to be defined as premises where medications are dispensed, which  
49  
50 386 compounds the confusion (by the public and decision makers) of professional primary care services  
51  
52 387 versus retailers.<sup>151</sup> Instead, pharmacies should be defined with respect to actions or services that  
53  
54 388 require specialised health knowledge to optimise health outcomes. For example, a retail approach to  
55  
56 389 over-the-counter (OTC) medications is to permit consumers to make their own choices, similar to  
57  
58  
59  
60



1  
2  
3 390 supermarket choices. Pharmacy input for into OTC purchases could potential decrease adverse  
4  
5 391 medication interactions or unnecessary allergic reactions.<sup>148</sup> The 'value-add' of community  
6  
7 392 pharmacies, evidence-informed engagement with consumers, can decrease morbidity and mortality  
8  
9  
10 393 outcomes and increase medication regimen adherence.<sup>151 153</sup>

11  
12  
13 394 Although community pharmacists can provide professional services off premises (e.g.,  
14  
15 395 immunizations in community and religious centres), they need to maintain their physical premises  
16  
17 396 and staff for financial reasons. In addition, pharmacy users seek out community pharmacy services  
18  
19 397 due to their accessibility and convenience, and without a physical space to engage regularly with  
20  
21 398 pharmacy users, trust-building between pharmacists and users is compromised.<sup>154</sup>

22  
23  
24  
25 399

26  
27 400 As evidenced by public media, many countries, including the UK are declaring service specifications  
28  
29 401 for COVID-19 vaccinations. Community pharmacists can potentially provide vaccination services in  
30  
31 402 two locations.<sup>155</sup> They can collaborate with GPs in Primary Care Networks (PCN) to support PCN  
32  
33 403 vaccination sites. Alternatively, they can provide a COVID-19 vaccination service from their premises  
34  
35  
36 404 if they meet service specifications. The described tensions create difficult choices for pharmacists  
37  
38 405 that can be ameliorated through the decision maker recommendations in Table 5.

39  
40 406

## 41 42 43 407 **Unanswered questions and future research**

44  
45  
46 408 A future realist evaluation involving primary data collection from key actors will inform refinement  
47  
48 409 of the programme theory, CMOCs and decision maker recommendations. This empirical research  
49  
50 410 will address the tensions identified above. Future research will also address issues identified through  
51  
52 411 the stakeholder groups, such as vaccination hesitancy, outside the scope of this review. While this  
53  
54 412 work touched upon unique issues for marginalised populations including ethnic minorities, those of  
55  
56  
57 413 lower socioeconomic status and those with disabilities, further exploration is needed.

1  
2  
3 414 We had initially focused the review on community pharmacy roles and pandemic response in middle  
4  
5 415 to high-income countries, but found limited data in middle-income countries. The findings are thus  
6  
7 416 more likely to be applicable to high-income countries but may serve to inform practice elsewhere.  
8  
9  
10 417 Empirical research, using for example a realist evaluation approach, should be conducted to extend  
11  
12 418 our findings on the role of community pharmacy in COVID vaccination programmes to middle to low  
13  
14 419 income countries.  
15  
16  
17 420  
18  
19  
20  
21 421 **Conclusion**  
22  
23  
24 422 The COVID-19 pandemic is a worldwide health emergency. Vaccination is key to combatting the  
25  
26 423 pandemic. The role of community pharmacy may be both short and long term; with a potential need  
27  
28 424 for regular annual vaccines. This rapid realist review offers recommendations for decision makers to  
29  
30 425 enable community pharmacy to play a key role, both during these unprecedented times and into the  
31  
32 426 future.  
33  
34  
35 427  
36  
37  
38 428  
39  
40  
41  
42 429  
43  
44  
45  
46  
47  
48  
49  
50  
51  
52  
53  
54  
55  
56  
57  
58  
59  
60

## 430 Acknowledgement:

431 We acknowledge the contribution from professional and member of the public key stakeholder.

## 432 Research Ethics Approval

433 This research did not involve human participants and therefore ethical approval was not required.

## 434 Funders

435 Jointly funded by UKRI and NIHR COV0176. The views expressed are those of the author(s) and not  
436 necessarily those of the NIHR, UKRI or the Department of Health and Social Care.

## 437 Contributorship statement

438 IM conceived and led the project and had overall responsibility for PERISCOPE. All team members  
439 developed develop the embryonic programme theory. AB conducted the searches. AB and GW  
440 advised on realist methods. GW also advised on primary care implications and provided  
441 methodological oversight. EY screened documents at title, abstract and full-text with support from  
442 AB and MM. EY, MM and JB coded relevant data into NVivo. EY, MM and JB conducted the data  
443 analysis/synthesis. HZ and AH advised on pharmacy aspects and policy implications. TK led PPI. TK  
444 and HZ advised on implications in ethnic minorities. All team members contributed drafting the final  
445 report for publication and approved the final draft for submission.

## 446 Data Sharing Statement

447 Data is available upon reasonable request to the lead author.

## 448 Competing Interests

1  
2  
3 449 Geoff Wong is Deputy Chair of the NIHR HTA Prioritisation Committee: Integrated Community Health  
4  
5 450 and Social Care (A) and Member of the NIHR HTA Prioritisation Committee: Integrated Community  
6  
7 451 Health and Social Care (A) Methods Group.  
8

9  
10 452 Andrew Booth is a member of the National Institute for Health Research Health Services and  
11  
12 453 Delivery Research Funding Board, the National Institute for Health Research Evidence Synthesis  
13  
14 454 Programme Advisory Group and the National Institute for Health Research School for Social Care  
15  
16 455 Research Commissioning Panel.  
17

18  
19 456  
20  
21  
22  
23  
24  
25  
26  
27  
28  
29  
30  
31  
32  
33  
34  
35  
36  
37  
38  
39  
40  
41  
42  
43  
44  
45  
46  
47  
48  
49  
50  
51  
52  
53  
54  
55  
56  
57  
58  
59  
60

For peer review only

457 **References**

- 458 1. Parkhurst C, Singh Purewal G, Donyai P. Community Pharmacy and COVID-19—The Unsung Heroes  
459 on Our High Streets. *Journal of Patient Experience* 2020;7(3):282-84. doi:  
460 10.1177/2374373520927638
- 461 2. Maidment I, Lawson S, Wong G, et al. Towards an understanding of the burdens of medication  
462 management affecting older people: the MEMORABLE realist synthesis. *BMC geriatrics*  
463 2020;20(1):183. doi: 10.1186/s12877-020-01568-x [published Online First: 2020/06/06]
- 464 3. Barry HE, Hughes CM. Managing medicines in the time of COVID-19: implications for community-  
465 dwelling people with dementia. *International Journal of Clinical Pharmacy* 2020. doi:  
466 10.1007/s11096-020-01116-y
- 467 4. Wickware C. Pharmacies' dispensing increases by up to a third as a result of COVID-19, survey  
468 finds. . *Pharm J* 2020:PJ April 2020 online. doi: 10.1211/pj.2020.20207917
- 469 5. Pharmaceutical Services Negotiating Committee. Flu Vaccination Service 2020 [Available from:  
470 <https://psnc.org.uk/services-commissioning/advanced-services/flu-vaccination-service>.  
471 Accessed 12/11/20]
- 472 6. Pharmaceutical Services Negotiating Committee. Vaccination Services 2020 [Available from:  
473 [https://psnc.org.uk/services-commissioning/locally-commissioned-services/vaccination-](https://psnc.org.uk/services-commissioning/locally-commissioned-services/vaccination-services)  
474 [services](https://psnc.org.uk/services-commissioning/locally-commissioned-services/vaccination-services). Accessed 08/12/2020]
- 475 7. Rendell T. Community pharmacist-led influenza vaccination: a service evaluation. *The*  
476 *Pharmaceutical Journal* 2020. doi: 10.1211/pj.2020.20208383
- 477 8. Public Health England. Beyond the data: Understanding the impact of COVID-19 on BAME groups.  
478 London: Public Health England, 2020. [Available from:  
479 [https://assets.publishing.service.gov.uk/government/uploads/system/uploads/attachment\\_  
480 data/file/892376/COVID\\_stakeholder\\_engagement\\_synthesis\\_beyond\\_the\\_data.pdf](https://assets.publishing.service.gov.uk/government/uploads/system/uploads/attachment_data/file/892376/COVID_stakeholder_engagement_synthesis_beyond_the_data.pdf).  
481 Accessed 08/12/20]

- 1  
2  
3 482 9. Patel M. We must tear down the barriers to equality for BAME communities highlighted by COVID-  
4  
5 483 19. *Pharmaceutical Journal* 2020. doi: 10.1211/PJ.2020.20208060  
6  
7 484 10. Robinson J. Ten things pharmacists should know about COVID-19 vaccines. *The Pharmaceutical*  
8  
9 485 *Journal* 2020. doi: 10.1211/pj.2020.20208429  
10  
11 486 11. Wong G, Brennan N, Mattick K, et al. Interventions to improve antimicrobial prescribing of  
12  
13 487 doctors in training: the IMPACT (IMProving Antimicrobial presCribing of doctors in Training)  
14  
15 488 realist review. *BMJ Open* 2015;5(10):e009059. doi: 10.1136/bmjopen-2015-009059  
16  
17 489 12. Maidment ID, Lawson S, Wong G, et al. Health Services and Delivery Research. Medication  
18  
19 490 management in older people: the MEMORABLE realist synthesis. Southampton (UK): NIHR  
20  
21 491 Journals Library 2020. doi: 10.3310/hsdr08260  
22  
23 492 13. Maidment I, Young E, Wong G, et al. A rapid realist review of community pharmacy support for  
24  
25 493 the public health agenda during the COVID-19 pandemic and future health emergencies.  
26  
27 494 PROSPERO 2020 CRD42020194078, 2020. doi: 10.1101/2021.02.01.21250765  
28  
29 495 14. Wong G, Greenhalgh T, Westhorp G, et al. Development of methodological guidance, publication  
30  
31 496 standards and training materials for realist and meta-narrative reviews: the RAMESES  
32  
33 497 (Realist And Meta-narrative Evidence Syntheses – Evolving Standards) project. *Health*  
34  
35 498 *Services and Delivery Research* 2014;2(30):1-252. doi: 10.3310/hsdr02300  
36  
37 499 15. Pharmacies across the UK close 'intermittently' to cope with increasing pressures from COVID-19.  
38  
39 500 *The Pharmaceutical Journal* 2020. doi: 10.1211/pj.2020.20207844  
40  
41 501 16. Cadogan CA, Hughes CM. On the frontline against COVID-19: Community pharmacists'  
42  
43 502 contribution during a public health crisis. *Research in Social and Administrative Pharmacy*  
44  
45 503 2021;17(1):2032-35. doi: 10.1016/j.sapharm.2020.03.015  
46  
47 504 17. Royal Pharmaceutical Society. RPS guidance on ethical, professional decision making in the  
48  
49 505 COVID-19 Pandemic. London: Royal Pharmaceutical Society, 2020. [Available from:  
50  
51 506 [https://www.rpharms.com/resources/pharmacy-guides/coronavirus-covid-19/coronavirus-  
54  
55  
56  
57  
58  
59  
60](https://www.rpharms.com/resources/pharmacy-guides/coronavirus-covid-19/coronavirus-<br/>52<br/>53 507 information-for-pharmacists/ethical-decision-making) information-for-pharmacists/ethical-decision-making. Accessed 12/12/20]

- 1  
2  
3 508 18. Pharmaceutical Services Negotiating Committee. PSNC Briefing 023/20: Early guidance on the  
4  
5 509 2020/21 Seasonal Influenza Vaccination Advanced Service 2020 [Available from:  
6  
7 510 [https://psnc.org.uk/services-commissioning/psnc-briefings-services-and-](https://psnc.org.uk/services-commissioning/psnc-briefings-services-and-commissioning/psnc-briefing-023-20-early-guidance-on-the-2020-21-seasonal-influenza-vaccination-advanced-service)  
8  
9  
10 511 [commissioning/psnc-briefing-023-20-early-guidance-on-the-2020-21-seasonal-influenza-](https://psnc.org.uk/services-commissioning/psnc-briefings-services-and-commissioning/psnc-briefing-023-20-early-guidance-on-the-2020-21-seasonal-influenza-vaccination-advanced-service)  
11  
12 512 [vaccination-advanced-service](https://psnc.org.uk/services-commissioning/psnc-briefings-services-and-commissioning/psnc-briefing-023-20-early-guidance-on-the-2020-21-seasonal-influenza-vaccination-advanced-service). Accessed 08/12/20]  
13  
14 513 19. Hattingh L, Sim TF, Sunderland B, et al. Successful implementation and provision of enhanced  
15  
16 514 and extended pharmacy services. *Research in Social and Administrative Pharmacy*  
17  
18 515 2020;16(4):464-74. doi: 10.1016/j.sapharm.2019.06.015 [published Online First:  
19  
20 516 2019/07/06]  
21  
22  
23 517 20. Greenhalgh T, Wong G, Westhorp G, et al. Retrodution in realist evaluation. [Internet]. The  
24  
25 518 RAMESES Project 2017. [Available from:  
26  
27 519 [http://www.ramesesproject.org/media/RAMESES\\_II\\_Retrodution.pdf](http://www.ramesesproject.org/media/RAMESES_II_Retrodution.pdf). Accessed 12/12/20]  
28  
29  
30 520 21. Wong G. Data Gathering in Realist Reviews: Looking for needles in haystacks. Doing Realist  
31  
32 521 Research: SAGE Publications Ltd, 2018:131-46. doi: 10.4135/9781526451729.n9  
33  
34 522 22. Long N. Development sociology: actor perspectives. London: Routledge 2003.  
35  
36  
37 523 23. National Pharmacy Association. Public see pharmacies as key to the future of healthcare in wake  
38  
39 524 of pandemic 2020 [Available from: [https://www.npa.co.uk/news-and-events/news-](https://www.npa.co.uk/news-and-events/news-item/public-see-pharmacies-as-key-to-the-future-of-healthcare-in-wake-of-pandemic)  
40  
41 525 [item/public-see-pharmacies-as-key-to-the-future-of-healthcare-in-wake-of-pandemic.](https://www.npa.co.uk/news-and-events/news-item/public-see-pharmacies-as-key-to-the-future-of-healthcare-in-wake-of-pandemic)  
42  
43 526 Accessed 14/01/2021].  
44  
45  
46 527 24. Royal Pharmaceutical Society. RPS Statement on the role of pharmacists in the COVID-19  
47  
48 528 Vaccination Programme London: Royal Pharmaceutical Society; 2020 [Available from:  
49  
50 529 [https://www.rpharms.com/Portals/0/FINAL\\_Statement%20on%20COVID-](https://www.rpharms.com/Portals/0/FINAL_Statement%20on%20COVID-19%20Vaccination_Dec%202020_.pdf?ver=2020-12-02-143304-017)  
51  
52 530 [19%20Vaccination\\_Dec%202020\\_.pdf?ver=2020-12-02-143304-017](https://www.rpharms.com/Portals/0/FINAL_Statement%20on%20COVID-19%20Vaccination_Dec%202020_.pdf?ver=2020-12-02-143304-017). Accessed 14/01/2021].  
53  
54  
55 531 25. Strand MA, Bratberg J, Eukel H, et al. Community Pharmacists' Contributions to Disease  
56  
57 532 Management During the COVID-19 Pandemic. *Preventing Chronic Disease* 2020;17. doi:  
58  
59 533 10.5888/pcd17.200317  
60

- 1  
2  
3 534 26. Elbeddini A, Prabakaran T, Almasalkhi S, et al. Pharmacists and COVID-19. *Journal of*  
4  
5 535 *Pharmaceutical Policy and Practice* 2020;13(1). doi: 10.1186/s40545-020-00241-3  
6  
7 536 27. Kirkdale CL, Nebout G, Taitel M, et al. Implementation of flu vaccination in community  
8  
9 pharmacies: Understanding the barriers and enablers. *Annales Pharmaceutiques Françaises*  
10 537  
11 2017;75(1):9-16. doi: 10.1016/j.pharma.2016.08.006  
12 538  
13  
14 539 28. Hindi AMK, Jacobs S, Schafheutle EI. Solidarity or dissonance? A systematic review of pharmacist  
15  
16 and GP views on community pharmacy services in the UK. *Health & Social Care in the*  
17 540  
18 *Community* 2018;27(3):565-98. doi: 10.1111/hsc.12618  
19 541  
20  
21 542 29. Deslandes R, Evans A, Baker S, et al. Community pharmacists at the heart of public health: A  
22  
23 longitudinal evaluation of the community pharmacy influenza vaccination service. *Research*  
24 543  
25 *in Social and Administrative Pharmacy* 2020;16(4):497-502. doi:  
26 544  
27 10.1016/j.sapharm.2019.06.016  
28 545  
29  
30 546 30. Sousa Pinto G, Hung M, Okoya F, et al. FIP's response to the COVID-19 pandemic: Global  
31  
32 pharmacy rises to the challenge. *Research in Social and Administrative Pharmacy*  
33 547  
34 2021;17(1):1929-33. doi: 10.1016/j.sapharm.2020.07.004  
35 548  
36  
37 549 31. Gregory PAM, Austin Z. COVID-19: How did community pharmacies get through the first wave?  
38  
39 *Canadian Pharmacists Journal / Revue des Pharmaciens du Canada* 2020;153(5):243-51. doi:  
40 550  
41 10.1177/1715163520945741  
42 551  
43  
44 552 32. Ung COL. Community pharmacist in public health emergencies: Quick to action against the  
45  
46 coronavirus 2019-nCoV outbreak. *Research in Social and Administrative Pharmacy*  
47 553  
48 2020;16(4):583-86. doi: 10.1016/j.sapharm.2020.02.003  
49 554  
50  
51 555 33. Burson RC, Buttenheim AM, Armstrong A, et al. Community pharmacies as sites of adult  
52  
53 vaccination: A systematic review. *Human vaccines & immunotherapeutics* 2016;12(12):3146-  
54 556  
55 59. doi: 10.1080/21645515.2016.1215393 [published Online First: 08/15]  
56  
57  
58  
59  
60



- 1  
2  
3 558 34. Nadeem MF, Samanta S, Mustafa F. Is the paradigm of community pharmacy practice expected  
4  
5 559 to shift due to COVID-19? *Research in Social and Administrative Pharmacy* 2021;17(1):2046-  
6  
7 560 48. doi: 10.1016/j.sapharm.2020.05.021  
8  
9  
10 561 35. Francis M, Hinchliffe A, Wales N. Vaccination services through community pharmacy. *Public*  
11  
12 562 *Health Wales NHS Trust, Wales: NHS Wales* 2010. [Available from:  
13  
14 563 <http://www2.nphs.wales.nhs.uk:8080/HealthServiceQTDDocs.nsf/public/CBDDC3C0BE9449>  
15  
16 564 398025793B00341A6F/\$file/Vaccination%20services%20through%20community%20pharma  
17  
18 565 cy%20v1a.pdf. Accessed 08/12/20]  
19  
20  
21 566 36. Clews G. Pharmacists able to administer unlicensed COVID-19 vaccines following legislation  
22  
23 567 changes. *The Pharmaceutical Journal* 2020;305. doi: 10.1211/PJ.2020.20208453  
24  
25 568 37. Welsh Government, Department of Health N. I., Scottish Government, et al. Supporting  
26  
27 569 pharmacists, pharmacy technicians and pharmacy teams throughout the second COVID-19  
28  
29 570 wave, 2020. [Available from: [https://www.pharmacyregulation.org/news/joint-letter-](https://www.pharmacyregulation.org/news/joint-letter-supporting-pharmacy-professionals-and-teams-through-second-covid-19-wave)  
30  
31 571 [supporting-pharmacy-professionals-and-teams-through-second-covid-19-wave](https://www.pharmacyregulation.org/news/joint-letter-supporting-pharmacy-professionals-and-teams-through-second-covid-19-wave). Accessed  
32  
33 572 12/12/20]  
34  
35  
36 573 38. Wickware C. NHS England to choose 'selected' number of pharmacies to deliver at least 1,000  
37  
38 574 COVID-19 vaccines per week. *The Pharmaceutical Journal* 2020. doi:  
39  
40 575 10.1211/PJ.2020.20208608  
41  
42  
43 576 39. Dyer C. Covid-19: Government poised to amend regulations to allow use of unlicensed vaccine.  
44  
45 577 *The BMJ* 2020. doi: 10.1136/bmj.m3757  
46  
47  
48 578 40. Cooper RJ. Pestle and mortar: the demise of community pharmacy in the UK. *International*  
49  
50 579 *Journal of Pharmacy Practice* 2020;28(3):205-06. doi: 10.1111/ijpp.12635  
51  
52 580 41. Robinson J. Health professionals delivering unlicensed vaccines need government protection, say  
53  
54 581 health bodies. *The Pharmaceutical Journal* 2020. doi: 10.1211/PJ.2020.20208381  
55  
56  
57  
58  
59  
60

- 1  
2  
3 582 42. Warner JG, Portlock J, Smith J, et al. Increasing seasonal influenza vaccination uptake using  
4  
5 583 community pharmacies: experience from the Isle of Wight, England. *International Journal of*  
6  
7 584 *Pharmacy Practice* 2013;21(6):362-67. doi: 10.1111/ijpp.12037  
8  
9  
10 585 43. Hindi AMK, Schafheutle EI, Jacobs S. Community pharmacy integration within the primary care  
11  
12 586 pathway for people with long-term conditions: a focus group study of patients', pharmacists'  
13  
14 587 and GPs' experiences and expectations. *BMC Fam Pract* 2019;20(1):26-26. doi:  
15  
16 588 10.1186/s12875-019-0912-0  
17  
18  
19 589 44. Pharmacy Voice, The Pharmaceutical Services Negotiating Committee, The Royal Pharmaceutical  
20  
21 590 Society, et al. Consultation response: UK Influenza Pandemic Preparedness Strategy 2011.  
22  
23 591 2011  
24  
25 592 45. Bauman JL. Hero clinical pharmacists and the COVID-19 pandemic: Overworked and overlooked.  
26  
27 593 *JACCP JAm Coll Clin Pharm* 2020. doi: 10.1002/jac5.1246  
28  
29  
30 594 46. Stone JK, Pate AN. The Impact of COVID-19 Through the Eyes of a Fourth-Year Pharmacy Student.  
31  
32 595 *American Journal of Pharmaceutical Education* 2020;84(6):ajpe8146. doi: 10.5688/ajpe8146  
33  
34 596 47. Royal College of General Practitioners. Delivering Mass Vaccinations During COVID-19 A Logistical  
35  
36 597 Guide for General Practice. London: Royal College of General Practitioners, 2020. [Available  
37  
38 598 from: [https://www.lmc.org.uk/visageimages/Covid-](https://www.lmc.org.uk/visageimages/Covid-19/RCGPMassVaccinationatimeofcovidV3.1.pdf)  
39  
40 599 [19/RCGPMassVaccinationatimeofcovidV3.1.pdf](https://www.lmc.org.uk/visageimages/Covid-19/RCGPMassVaccinationatimeofcovidV3.1.pdf). Accessed 08.12.20]  
41  
42  
43 600 48. NHS England and NHS Improvement coronavirus. Urgent preparing for General Practice to  
44  
45 601 contribute to a potential COVID-19 Vaccination Programme. In: Service NH, ed. London,  
46  
47 602 2020. [Available from: [https://www.england.nhs.uk/coronavirus/covid-19-vaccination-](https://www.england.nhs.uk/coronavirus/covid-19-vaccination-programme/primary-care-guidance/preparing-for-gp-to-contribute-to-a-potential-covid-19-vaccination-programme)  
48  
49 603 [programme/primary-care-guidance/preparing-for-gp-to-contribute-to-a-potential-covid-19-](https://www.england.nhs.uk/coronavirus/covid-19-vaccination-programme/primary-care-guidance/preparing-for-gp-to-contribute-to-a-potential-covid-19-vaccination-programme)  
50  
51 604 [vaccination-programme](https://www.england.nhs.uk/coronavirus/covid-19-vaccination-programme/primary-care-guidance/preparing-for-gp-to-contribute-to-a-potential-covid-19-vaccination-programme). Accessed 08/12/20]  
52  
53  
54 605 49. Wickware, C. NHS England to choose 'selected' number of pharmacies to deliver at least 1,000  
55  
56 606 COVID-19 vaccines per week. *The Pharmaceutical Journal* 2020. doi:  
57  
58 607 10.1211/pj.2020.20208608  
59  
60

- 1  
2  
3 608 50. Koster ES, Philbert D, Bouvy ML. Impact of the COVID-19 epidemic on the provision of  
4  
5 609 pharmaceutical care in community pharmacies. *Research in Social and Administrative*  
6  
7 610 *Pharmacy* 2020. doi: 10.1016/j.sapharm.2020.07.001  
8  
9  
10 611 51. Elbeddini A, Wen CX, Tayefehchamani Y, et al. Mental health issues impacting pharmacists during  
11  
12 612 COVID-19. *Journal of Pharmaceutical Policy and Practice* 2020;13(1). doi: 10.1186/s40545-  
13  
14 613 020-00252-0  
15  
16 614 52. Bukhari N, Rasheed H, Nayyer B, et al. Pharmacists at the frontline beating the COVID-19  
17  
18 615 pandemic. *Journal of Pharmaceutical Policy and Practice* 2020;13 (1). doi: 10.1186/s40545-  
19  
20 616 020-00210-w  
21  
22  
23 617 53. Eidt, M. Pharmacists on the frontline. *Canadian Pharmacists Journal* 2020;153(4):186-90. doi:  
24  
25 618 10.1177/1715163520930191  
26  
27  
28 619 54. Farrell B, Tsuyuki RT. Pharmacists step up to the challenge of COVID-19. *Canadian Pharmacists*  
29  
30 620 *Journal* 2020;153(4):185. doi: 10.1177/1715163520930705  
31  
32 621 55. Bragazzi NL, Mansour M, Bonsignore A, et al. The Role of Hospital and Community Pharmacists in  
33  
34 622 the Management of COVID-19: Towards an Expanded Definition of the Roles,  
35  
36 623 Responsibilities, and Duties of the Pharmacist. *Pharmacy (Basel, Switzerland)* 2020. doi:  
37  
38 624 10.3390/pharmacy8030140  
39  
40  
41 625 56. Chan AHY, Rutter V, Ashiru-Oredope D, et al. Together we unite: The role of the Commonwealth  
42  
43 626 in achieving universal health coverage through pharmaceutical care amidst the COVID-19  
44  
45 627 pandemic. *Journal of Pharmaceutical Policy and Practice* 2020;13(1). doi: 10.1186/s40545-  
46  
47 628 020-00214-6  
48  
49  
50 629 57. Moore A. Pharmacists in one county say working with GP practices during the COVID-19  
51  
52 630 pandemic has been 'difficult'. *The Pharmaceutical Journal* 2020. doi:  
53  
54 631 10.1211/PJ.2020.20208556  
55  
56  
57 632 58. Hoti K, Jakupi A, Hetemi D, et al. Provision of community pharmacy services during COVID-19  
58  
59 633 pandemic: a cross sectional study of community pharmacists' experiences with preventative  
60

- 1  
2  
3 634 measures and sources of information. *Int J Clin Pharm* 2020. doi: 10.1007/s11096-020-  
4  
5 635 01078-1  
6  
7 636 59. NHS England and NHS Improvement coronavirus. Urgent preparing for Community Pharmacy to  
8  
9 contribute to a potential COVID-19 Vaccination Programme. In: Service NH, ed. London,  
10 637  
11 2020. [Available from: [https://www.england.nhs.uk/coronavirus/covid-19-vaccination-](https://www.england.nhs.uk/coronavirus/covid-19-vaccination-programme/primary-care-guidance/preparing-for-community-pharmacy-to-contribute-to-a-potential-covid-19-vaccination-programme)  
12 638  
13 programme/primary-care-guidance/preparing-for-community-pharmacy-to-contribute-to-a-  
14 639  
15 potential-covid-19-vaccination-programme. Accessed 08/12/20]  
16 640  
17  
18 641 60. Austin Z, Martin JC, Gregory PAM. Pharmacy practice in times of civil crisis: The experience of  
19  
20 SARS and “the blackout” in Ontario, Canada. *Research in Social and Administrative Pharmacy*  
21 642  
22 2007;3(3):320-35. doi: 10.1016/j.sapharm.2006.09.001  
23 643  
24  
25 644 61. Chahine EB. The Role of Pharmacists in the Fight Against COVID-19. *Sr Care Pharm*  
26  
27 2020;35(7):286-91. doi: 10.4140/TCP.n.2020.286  
28 645  
29  
30 646 62. Jubraj B. Remote consultations: how pharmacy teams can practise them successfully:  
31  
32 pharmaceutical-journal.com 2020. [Available from: [https://pharmaceutical-](https://pharmaceutical-journal.com/article/ld/remote-consultations-how-pharmacy-teams-can-practise-them-successfully)  
33 647  
34 journal.com/article/ld/remote-consultations-how-pharmacy-teams-can-practise-them-  
35 648  
36 successfully. Accessed 12/12/20]  
37 649  
38  
39 650 63. Royal Pharmaceutical Society. All-Party Pharmacy Group warns of pressures on pharmacies  
40  
41 London: Royal Pharmaceutical Society 2020 [Available from:  
42  
43 [https://www.rpharms.com/about-us/news/details/All-Party-Pharmacy-Group-warns-of-](https://www.rpharms.com/about-us/news/details/All-Party-Pharmacy-Group-warns-of-pressures-on-pharmacies#:~:text=The%20All%2DParty%20Pharmacy%20Group,continued%20pressures%20facing%20community%20pharmacies)  
44 652  
45 pressures-on-  
46 653  
47 pharmacies#:~:text=The%20All%2DParty%20Pharmacy%20Group,continued%20pressures%  
48 654  
49 20facing%20community%20pharmacies. Accessed 14/01/2021]  
50 655  
51  
52 656 64. Barnes E, Bullock A, Allan M, et al. Community pharmacists’ opinions on skill-mix and delegation  
53  
54 in England. *International Journal of Pharmacy Practice* 2017;26(5):398-406. doi:  
55 657  
56 10.1111/ijpp.12419  
57 658  
58  
59  
60

- 1  
2  
3 659 65. Saramunee K, Krska J, Mackridge A, et al. How to enhance public health service utilization in  
4  
5 660 community pharmacy?: General public and health providers' perspectives. *Research in Social*  
6  
7 661 *and Administrative Pharmacy* 2014;10(2):272-84. doi: 10.1016/j.sapharm.2012.05.006  
8  
9  
10 662 66. Houle SKD, Grindrod KA, Chatterley T, et al. Paying pharmacists for patient care: A systematic  
11  
12 663 review of remunerated pharmacy clinical care services. *Can Pharm J (Ott)* 2014;147(4):209-  
13  
14 664 32. doi: 10.1177/1715163514536678  
15  
16 665 67. Burns C. Pharmacy staff in Scotland to receive £500 bonus in recognition of COVID-19 service. *the*  
17  
18 *Pharmaceutical Journal* 2020 doi: 10.1211/PJ.2020.20208614 [published Online First:  
19 666  
20 12/2020]  
21 667  
22  
23 668 68. Evans AM, Wood FC, Carter B. National community pharmacy NHS influenza vaccination service  
24  
25 669 in Wales: a primary care mixed methods study. *British Journal of General Practice*  
26  
27 670 2016;66(645):e248-e57. doi: 10.3399/bjgp16x684349  
28  
29  
30 671 69. Moore A. No going back: how the pandemic is changing community pharmacy. *The*  
31  
32 672 *Pharmaceutical Journal* 2020;305. doi: 10.1211/PJ.2020.20208309  
33  
34 673 70. Merks P, Jakubowska M, Drelich E, et al. The legal extension of the role of pharmacists in light of  
35  
36 674 the COVID-19 global pandemic. *Research in Social and Administrative Pharmacy* 2020 doi:  
37  
38 675 10.1016/j.sapharm.2020.05.033  
39  
40  
41 676 71. Zaidi STR, Hasan SS. Personal protective practices and pharmacy services delivery by community  
42  
43 677 pharmacists during COVID-19 pandemic: Results from a national survey. *Research in Social*  
44  
45 678 *and Administrative Pharmacy* 2020. doi: 10.1016/j.sapharm.2020.07.006  
46  
47  
48 679 72. Anon. Pharmacies must be at the forefront of the COVID-19 vaccination campaign. *The*  
49  
50 680 *Pharmaceutical Journal* 2020;305. doi: 10.1211/PJ.2020.20208546  
51  
52 681 73. Robinson J. England has lowest number of community pharmacies in five years, figures show.  
53  
54 682 *The Pharmaceutical Journal* 2020. doi: 10.1211/PJ.2020.20208569  
55  
56  
57 683 74. Wickware C. Pharmacies to be paid 50p more per flu vaccination in 2020/2021. *The*  
58  
59 684 *Pharmaceutical Journal* 2020. doi: 10.1211/PJ.2020.20208362  
60

- 1  
2  
3 685 75. Doyle-Price J. Pharmacies have an important role in this pandemic – but they need help to  
4  
5 686 continue saving lives. *The Telegraph* 2020. [Available from:  
6  
7 687 <https://www.telegraph.co.uk/global-health/science-and-disease/pharmacies-have-crucial->  
8  
9 688 [place-communities-need-help-continue](https://www.telegraph.co.uk/global-health/science-and-disease/pharmacies-have-crucial-place-communities-need-help-continue). Accessed 12/12/20]  
10  
11  
12 689 76. Robinson J. Up to 85% of community pharmacies could be in financial deficit by 2024, economic  
13  
14 690 analysis concludes. *The Pharmaceutical Journal* 2020. doi: 10.1211/PJ.2020.20208332  
15  
16 691 77. Wilkinson E, Connelly D. Is pharmacy prepared for a resurgence of COVID-19? *The*  
17  
18 692 *Pharmaceutical Journal* 2020;305. doi: 10.1211/PJ.2020.20208340  
19  
20  
21 693 78. Hayden JC, Parkin R. The challenges of COVID-19 for community pharmacists and opportunities  
22  
23 694 for the future. *Irish Journal of Psychological Medicine* 2020;37(3):198-203. doi:  
24  
25 695 10.1017/ipm.2020.52  
26  
27  
28 696 79. Mercadante AR, Yokota M, Hwang A, et al. Choosing Evolution over Extinction: Integrating Direct  
29  
30 697 Patient Care Services and Value-Based Payment Models into the Community-Based  
31  
32 698 Pharmacy Setting. *Pharmacy* 2020;8(3):128. doi: 10.3390/pharmacy8030128  
33  
34  
35 699 80. Stewart K, Barai R, Priorities N. How to keep your community pharmacy running during the  
36  
37 700 COVID-19 pandemic 2020. [Available from: [https://pharmaceutical-](https://pharmaceutical-journal.com/article/ld/how-to-keep-your-community-pharmacy-running-during-the-covid-19-pandemic)  
38  
39 701 [journal.com/article/ld/how-to-keep-your-community-pharmacy-running-during-the-covid-](https://pharmaceutical-journal.com/article/ld/how-to-keep-your-community-pharmacy-running-during-the-covid-19-pandemic)  
40  
41 702 [19-pandemic](https://pharmaceutical-journal.com/article/ld/how-to-keep-your-community-pharmacy-running-during-the-covid-19-pandemic). Accessed 24/02/21]  
42  
43  
44 703 81. Hussain R, Dawoud DM, Babar Z-U-D. Drive-thru pharmacy services: A way forward to combat  
45  
46 704 COVID-19 pandemic. *Research in Social and Administrative Pharmacy* 2021;17(1):1920-24.  
47  
48 705 doi: 10.1016/j.sapharm.2020.07.015  
49  
50 706 82. Broughel J, Yatsyshina Y. Relax Pharmacy Regulations to Help with COVID-19 Testing and  
51  
52 707 Treatment. *SSRN Electronic Journal* 2020. doi: 10.2139/ssrn.3564463  
53  
54  
55 708 83. Pritchard RI, Huff J, Scheinberg N. Impact of Regulatory Changes on Pharmacist Delivered  
56  
57 709 Telehealth During the COVID-19 Pandemic. *Journal of the American Pharmacists Association*  
58  
59 710 2020;60(6):e76-e79. doi: 10.1016/j.japh.2020.06.004  
60

- 1  
2  
3 711 84. Lynch M, Leary A. COVID-19 related regulatory change for pharmacists – The case for its  
4  
5 712 retention post the pandemic. *Research in Social and Administrative Pharmacy* 2020. doi:  
6  
7 713 10.1016/j.sapharm.2020.07.037  
8  
9  
10 714 85. Erku DA, Belachew SA, Abrha S, et al. When fear and misinformation go viral: Pharmacists' role in  
11  
12 715 deterring medication misinformation during the 'infodemic' surrounding COVID-19. *Research*  
13  
14 716 *in Social and Administrative Pharmacy* 2020. doi: 10.1016/j.sapharm.2020.04.032  
15  
16  
17 717 86. Andrawis M, Carmichael J, Collins CD, et al. Improving patient care and demonstrating value  
18  
19 718 during a global pandemic: Recommendations from leaders of the Pharmacy Accountability  
20  
21 719 Measures Work Group. *American journal of health-system pharmacy : AJHP : official journal*  
22  
23 720 *of the American Society of Health-System Pharmacists* 2020. doi: 10.1093/ajhp/zxaa291  
24  
25  
26 721 87. Kawaguchi-Suzuki M, Nagai N, Akonoghrere RO. COVID-19 Pandemic Challenges and Lessons  
27  
28 722 Learned by Pharmacy Educators Around the Globe. *American Journal of Pharmaceutical*  
29  
30 723 *Education* 2020;84(8) [published Online First: 2020 Aug 1]. doi: 10.5688/ajpe8197  
31  
32  
33 724 88. General Pharmaceutical Council. Rising to the challenge [blog] 2020 [Available from:  
34  
35 725 <https://www.pharmacyregulation.org/regulate/blog/rising-challenge>. Accessed 14/01/2020  
36  
37 726 2020]  
38  
39 727 89. Robinson J. Government consults on allowing pharmacy technicians to administer COVID-19 and  
40  
41 728 flu vaccines. *The Pharmaceutical Journal* 2020. doi: 10.1211/PJ.2020.20208311  
42  
43  
44 729 90. Nessel, J. Pharmacy Technicians Rise to Meet Patient Needs During Coronavirus Pandemic.  
45  
46 730 *Pharmacy Times* 2020. Available from: [https://www.pharmacytimes.com/view/pharmacy-](https://www.pharmacytimes.com/view/pharmacy-technicians-rise-to-meet-patient-needs-during-coronavirus-pandemic)  
47  
48 731 [technicians-rise-to-meet-patient-needs-during-coronavirus-pandemic](https://www.pharmacytimes.com/view/pharmacy-technicians-rise-to-meet-patient-needs-during-coronavirus-pandemic). Accessed 08.12.20]  
49  
50 732 91. Green TC, Bratberg J, Finnell DS. Opioid use disorder and the COVID 19 pandemic: A call to  
51  
52 733 sustain regulatory easements and further expand access to treatment. *Subst Abus*  
53  
54 734 *2020;41(2):147-49*. doi: 10.1080/08897077.2020.1752351  
55  
56  
57 735 92. Carico R. Pharmacists continue to protect communities during COVID-19. *Journal of the American*  
58  
59 736 *Pharmacists Association* 2020;60(5):660-61. doi: 10.1016/j.japh.2020.08.009  
60

- 1  
2  
3 737 93. Bond C, Blenkinsopp A, Inch J, et al. The effect of the new community pharmacy contract on the  
4  
5 738 community pharmacy workforce. *London: Pharmacy Practice Research Trust* 2008;8:9.  
6  
7 739 Available from: [https://pharmacyresearchuk.org/wp-](https://pharmacyresearchuk.org/wp-content/uploads/2012/11/The_effect_of_the_new_community_pharmacy_contract_on_the_community_pharmacy_workforce.pdf)  
8  
9  
10 740 content/uploads/2012/11/The\_effect\_of\_the\_new\_community\_pharmacy\_contract\_on\_the  
11  
12 741 \_community\_pharmacy\_workforce.pdf. Accessed 08/12/20]
- 14 742 94. Melton BL, Lai Z. Review of community pharmacy services: what is being performed, and where  
15  
16 743 are the opportunities for improvement? *Integr Pharm Res Pract* 2017;6:79-89. doi:  
17  
18 744 10.2147/IPRP.S107612
- 21 745 95. Wilson CG, Ramage M, Fagan EB. A Primary Care Response to COVID-19 for Patients with an  
22  
23 746 Opioid Use Disorder. *J Rural Health* 2020. doi: 10.1111/jrh.12438
- 25 747 96. Kostev K, Lauterbach S. Panic buying or good adherence? Increased pharmacy purchases of drugs  
26  
27 748 from wholesalers in the last week prior to Covid-19 lockdown. *J Psychiatr Res* 2020;130:19-  
28  
29 749 21. doi: 10.1016/j.jpsychires.2020.07.005
- 32 750 97. Bell JS, Reynolds L, Freeman C, et al. Strategies to promote access to medications during the  
33  
34 751 COVID-19 pandemic. *Aust J Gen Pract* 2020;49(8):530-32. doi: 10.31128/AJGP-04-20-5390
- 36 752 98. Romano S, Galante H, Figueira D, et al. Time-trend analysis of medicine sales and shortages  
37  
38 753 during COVID-19 outbreak: Data from community pharmacies. *Research in Social and*  
39  
40 754 *Administrative Pharmacy* 2020. doi: 10.1016/j.sapharm.2020.05.024
- 43 755 99. Gross AE, MacDougall C. Roles of the clinical pharmacist during the COVID-19 pandemic. *JACCP*  
44  
45 756 *JAm Coll Clin Pharm* 2020;3(3):564-66. doi: 10.1002/jac5.1231
- 48 757 100. Lapeyre-Mestre M, Boucher A, Daveluy A, et al. Addictovigilance contribution during COVID-19  
49  
50 758 epidemic and lockdown in France. *Therapies* 2020. doi: 10.1016/j.therap.2020.06.006
- 52 759 101. Alderman C. Pharmacy Services and the Novel Coronavirus. *The Senior Care Pharmacist* 2020;35  
53  
54 760 (4):146-47. doi: 10.4140/TCP.n.2020.146



- 1  
2  
3 761 102. Hasan SS, Kow CS, Zaidi STR. Social distancing and the use of PPE by community pharmacy  
4  
5 762 personnel: Does evidence support these measures? *Research in Social and Administrative*  
6  
7 763 *Pharmacy* 2020;17(2):456-9. doi: 10.1016/j.sapharm.2020.04.033  
8  
9  
10 764 103. Thomas CEL, Phipps DL, Ashcroft DM. When procedures meet practice in community  
11  
12 765 pharmacies: qualitative insights from pharmacists and pharmacy support staff. *BMJ open*  
13  
14 766 2016;6(6):e010851-e51. doi: 10.1136/bmjopen-2015-010851  
15  
16 767 104. NHS England and NHS Improvement coronavirus. Standard operating procedure: COVID-19 local  
17  
18 768 vaccination services deployment in community settings. London: National Health Service  
19  
20 769 2020. Available from: [https://www.england.nhs.uk/coronavirus/publication/standard-](https://www.england.nhs.uk/coronavirus/publication/standard-operating-procedure-covid-19-local-vaccination-services-deployment-in-community-settings)  
21  
22 770 [operating-procedure-covid-19-local-vaccination-services-deployment-in-community-](https://www.england.nhs.uk/coronavirus/publication/standard-operating-procedure-covid-19-local-vaccination-services-deployment-in-community-settings)  
23  
24 771 [settings](https://www.england.nhs.uk/coronavirus/publication/standard-operating-procedure-covid-19-local-vaccination-services-deployment-in-community-settings). Accessed 08.12.20]  
25  
26  
27 772 105. Cabas P, Di Bella S, Giuffrè M, et al. Community pharmacists' exposure to COVID-19. *Research in*  
28  
29 773 *Social and Administrative Pharmacy* 2021;17(1):1882-87. doi:  
30  
31 774 10.1016/j.sapharm.2020.05.020  
32  
33  
34 775 106. Sum ZZ, Ow CJW. Community pharmacy response to infection control during COVID-19. A cross-  
35  
36 776 sectional survey. *Res Soc Adm Pharm* 2020;17(1):1845-52. doi:  
37  
38 777 10.1016/j.sapharm.2020.06.014  
39  
40  
41 778 107. Al-Quteimat OM, Amer AM. SARS-CoV-2 outbreak: How can pharmacists help? *Research in*  
42  
43 779 *Social and Administrative Pharmacy* 2021;17(2):480-82. doi: 10.1016/j.sapharm.2020.03.018  
44  
45 780 [published Online First: 2020 Mar 26]  
46  
47  
48 781 108. Dawoud D. Emerging from the other end: Key measures for a successful COVID-19 lockdown  
49  
50 782 exit strategy and the potential contribution of pharmacists. *Research in Social and*  
51  
52 783 *Administrative Pharmacy* 2020. doi: 10.1016/j.sapharm.2020.05.011  
53  
54 784 109. Weir NM, Newham R, Bennie M. A literature review of human factors and ergonomics within  
55  
56 785 the pharmacy dispensing process. *Research in Social and Administrative Pharmacy*  
57  
58 786 2020;16(5):637-45. doi: 10.1016/j.sapharm.2019.08.029  
59  
60

- 1  
2  
3 787 110. Maine LL. An Unparalleled Spirit of Collaboration Amid the COVID-19 Pandemic. *Am J Pharm*  
4  
5 788 *Educ* 2020;84(6):ajpe8155-ajpe55. doi: 10.5688/ajpe8155  
6  
7 789 111. Dowden A. Will Serious Shortage Protocols help ease drug shortages? *Prescriber* 2020;31(5):29-  
8  
9 790 31. doi: 10.1002/psb.1844  
10  
11 791 112. NHS England, NHS Improvement coronavirus. Novel coronavirus (COVID-19) standard operating  
12  
13 792 procedure-Community Pharmacy. [Available from: [https://www.england.nhs.uk/wp-](https://www.england.nhs.uk/wp-content/uploads/2020/02/20200305-COVID-19-PRIMARY-CARE-SOP-COMM-PHARM-PUBLICATION-V1)  
14  
15 793 [content/uploads/2020/02/20200305-COVID-19-PRIMARY-CARE-SOP-COMM-PHARM-](https://www.england.nhs.uk/wp-content/uploads/2020/02/20200305-COVID-19-PRIMARY-CARE-SOP-COMM-PHARM-PUBLICATION-V1)  
16  
17 794 [PUBLICATION-V1](https://www.england.nhs.uk/wp-content/uploads/2020/02/20200305-COVID-19-PRIMARY-CARE-SOP-COMM-PHARM-PUBLICATION-V1). 2020 Apr;1: skills4pharmacy.org.uk 2020. Accessed 08/12/20]  
18  
19 795 113. Butt M. Covid-19 vaccination: Logistical challenges for general practice. *Practice Management*  
20  
21 796 2021;31(1):20-21. doi: 10.12968/prma.2021.31.1.20  
22  
23 797 114. National Pharmacy Association (NPA). Pharmacy on the NHS frontline 2020 [Available from:  
24  
25 798 <https://nhsfrontline.com/coronavirus-stories-from-the-health-service-frontline>. Accessed  
26  
27 799 17/08/2020 2020]  
28  
29 800 115. Pharmaceutical Services Negotiating Committee. Community Pharmacy Contractual  
30  
31 801 Framework: Pharmaceutical Services Negotiating Committee; 2021 [Available from:  
32  
33 802 <https://psnc.org.uk/contract-it/the-pharmacy-contract>. Accessed 08/02/21  
34  
35 803 116. Quinn B. UK pharmacists facing abuse and violence during lockdown. *The Guardian* 2020 Apr  
36  
37 804 2nd 2020. [Available from: [https://www.theguardian.com/world/2020/apr/02/uk-](https://www.theguardian.com/world/2020/apr/02/uk-pharmacists-facing-abuse-and-violence-during-coronavirus-lockdown)  
38  
39 805 [pharmacists-facing-abuse-and-violence-during-coronavirus-lockdown](https://www.theguardian.com/world/2020/apr/02/uk-pharmacists-facing-abuse-and-violence-during-coronavirus-lockdown). Accessed 12/12/20]  
40  
41 806 117. Wickware C. Health board pilots delivery of flu vaccines by pharmacy technicians to manage  
42  
43 807 increased demand. *The Pharmaceutical Journal* 2020. doi: 10.1211/PJ.2020.20208565  
44  
45 808 118. Royal Pharmaceutical Society. The future of pharmacy in a sustainable NHS: Key principles for  
46  
47 809 transformation and growth. London: Royal Pharmaceutical Society, 2020. [Available from:  
48  
49 810 <https://www.rpharms.com/recognition/all-our-campaigns/policy-a-z/future-of-pharmacy>.  
50  
51 811 Accessed 08/01/21]  
52  
53  
54  
55  
56  
57  
58  
59  
60

- 1  
2  
3 812 119. Sparkman A, Brookhart AL, Goode J-VKR. The impact of an immunization check-up at a  
4  
5 813 pharmacist-provided employee health screening. *Journal of the American Pharmacists*  
6  
7 814 *Association* 2017;57(3):S274-S78. doi: 10.1016/j.japh.2017.02.010  
8  
9  
10 815 120. Rodgers RM, Gammie SM, Loo RL, et al. Comparison of pharmacist and public views and  
11  
12 816 experiences of community pharmacy medicines-related services in England. *Patient Prefer*  
13  
14 817 *Adherence* 2016;10:1749-58. doi: 10.2147/PPA.S112931  
15  
16 818 121. Hindi AMK, Schafheutle EI, Jacobs S. Patient and public perspectives of community pharmacies  
17  
18 819 in the United Kingdom: A systematic review. *Health Expectations* 2017;21(2):409-28. doi:  
19  
20 820 10.1111/hex.12639  
21  
22  
23 821 122. Letley L, Ramsay M. Discussing the MMR vaccine with patients. *The Pharmaceutical Journal*  
24  
25 822 2019. doi: 10.1211/pj.2019.20205819  
26  
27  
28 823 123. Kember J, Hodson K, James DH. The public's perception of the role of community pharmacists in  
29  
30 824 Wales. *International Journal of Pharmacy Practice* 2017;26(2):120-28. doi:  
31  
32 825 10.1111/ijpp.12375  
33  
34 826 124. Gidman W, Ward P, McGregor L. Understanding public trust in services provided by community  
35  
36 827 pharmacists relative to those provided by general practitioners: a qualitative study. *BMJ*  
37  
38 828 *open* 2012;2(3):e000939. doi: 10.1136/bmjopen-2012-000939  
39  
40  
41 829 125. McConeghy KW, Wing C. A national examination of pharmacy-based immunization statutes and  
42  
43 830 their association with influenza vaccinations and preventive health. *Vaccine* 2016. doi:  
44  
45 831 10.1016/j.vaccine.2016.04.076  
46  
47  
48 832 126. Cheong MWL, Brock T, Karwa R, et al. COVID-19 and Clinical Pharmacy Worldwide - A Wake Up  
49  
50 833 Call and a Call to Action. *JACCP JAm Coll Clin Pharm* 2020;3(5):860-63. doi:  
51  
52 834 10.1002/jac5.1286  
53  
54  
55 835 127. Adunlin G, Murphy PZ, Manis M. COVID-19: How Can Rural Community Pharmacies Respond to  
56  
57 836 the Outbreak? *J Rural Health* 2020. doi: 10.1111/jrh.12439  
58  
59  
60

- 1  
2  
3 837 128. Aruru M, Truong HA, Clark S. Pharmacy Emergency Preparedness and Response (PEPR): a  
4  
5 838 proposed framework for expanding pharmacy professionals' roles and contributions to  
6  
7 839 emergency preparedness and response during the Covid-19 pandemic and beyond. *Research*  
8  
9  
10 840 *in Social and Administrative Pharmacy* 2020;17(1):1967-77. doi:  
11  
12 841 10.1016/j.sapharm.2020.04.002  
13  
14 842 129. Fiore V. GP referrals under CPCS to go live November 1, NHSE confirms. *Chemist and Druggist*  
15  
16 843 2020. [Available from: [https://www.chemistanddruggist.co.uk/news/-gp-referrals-under-](https://www.chemistanddruggist.co.uk/news/-gp-referrals-under-cpcs-live-november-1-nhse-says)  
17  
18 844 [cpcs-live-november-1-nhse-says](https://www.chemistanddruggist.co.uk/news/-gp-referrals-under-cpcs-live-november-1-nhse-says). Accessed 11/11/20]  
19  
20  
21 845 130. Robinson J. Public Health England to review guidance against the use of rapid COVID-19 tests in  
22  
23 846 community pharmacies. *the Pharmaceutical Journal* 2020;305. doi:  
24  
25 847 10.1211/PJ.2020.20208550  
26  
27  
28 848 131. Buchan SA, Rosella LC, Finkelstein M, et al. Impact of pharmacist administration of influenza  
29  
30 849 vaccines on uptake in Canada. *Canadian Medical Association Journal* 2016;189(4):E146-E52.  
31  
32 850 doi: 10.1503/cmaj.151027  
33  
34  
35 851 132. Calo WA, Shah PD, Gilkey MB, et al. Implementing pharmacy-located HPV vaccination: findings  
36  
37 852 from pilot projects in five U.S. states. *Human Vaccines & Immunotherapeutics* 2019;15(7-  
38  
39 853 8):1831-38. doi: 10.1080/21645515.2019.1602433  
40  
41  
42 854 133. Anderson C, Thornley T. "It's easier in pharmacy": why some patients prefer to pay for flu jabs  
43  
44 855 rather than use the National Health Service. *BMC Health Services Research* 2014;14(1). doi:  
45  
46 856 10.1186/1472-6963-14-35  
47  
48  
49 857 134. Baroy J, Chung D, Frisch R, et al. The impact of pharmacist immunization programs on adult  
50  
51 858 immunization rates: a systematic review and meta-analysis. *Journal of the American*  
52  
53 859 *Pharmacists Association* 2016;56(4):418-26. doi: 10.1016/j.japh.2016.03.006  
54  
55 860 135. Anderson C, Thornley T. Who uses pharmacy for flu vaccinations? Population profiling through a  
56  
57 861 UK pharmacy chain. *International Journal of Clinical Pharmacy* 2016;38(2):218-22. doi:  
58  
59 862 10.1007/s11096-016-0255-z  
60

- 1  
2  
3 863 136. Pharmacy Guild of Australia. 93 per cent of Aussies recognise benefits of flu shot in pharmacy–  
4  
5 864 Pharmacy Guild of Australia [blog]: Pharmacy Guild of Australia 2017. [Available from:  
6  
7 865 <https://www.guild.org.au/news-events/news/2017/93-per-cent-of-aussies-recognise->  
8  
9 866 [benefits-of-flu-shot-in-pharmacy](https://www.guild.org.au/news-events/news/2017/93-per-cent-of-aussies-recognise-benefits-of-flu-shot-in-pharmacy). Accessed 12/12/20]  
10  
11  
12 867 137. Latif A, Tariq S, Abbasi N, et al. Giving Voice to the Medically Under-Served: A Qualitative Co-  
13  
14 868 Production Approach to Explore Patient Medicine Experiences and Improve Services to  
15  
16 869 Marginalized Communities. *Pharmacy (Basel, Switzerland)* 2018;6(1):13. doi:  
17  
18 870 10.3390/pharmacy6010013  
19  
20  
21 871 138. Anderson C, Blenkinsopp A, Armstrong M. Feedback from community pharmacy users on the  
22  
23 872 contribution of community pharmacy to improving the public's health: a systematic review  
24  
25 873 of the peer reviewed and non-peer reviewed literature 1990-2002. *Health Expect*  
26  
27 874 2004;7(3):191-202. doi: 10.1111/j.1369-7625.2004.00274.x  
28  
29  
30 875 139. Eades CE, Ferguson JS, O'Carroll RE. Public health in community pharmacy: a systematic review  
31  
32 876 of pharmacist and consumer views. *BMC public health* 2011;11:582-82. doi: 10.1186/1471-  
33  
34 877 2458-11-582  
35  
36  
37 878 140. Hassell K, Rogers A, Noyce P. Community pharmacy as a primary health and self-care resource:  
38  
39 879 a framework for understanding pharmacy utilization. *Health and Social Care in the*  
40  
41 880 *Community* 2000;8(1):40-49. doi: 10.1046/j.1365-2524.2000.00222.x  
42  
43  
44 881 141. Alkhalili M, Ma J, Grenier S. Defining Roles for Pharmacy Personnel in Disaster Response and  
45  
46 882 Emergency Preparedness. *Disaster Medicine and Public Health Preparedness*  
47  
48 883 2017;11(4):496-504. doi: 10.1017/dmp.2016.172  
49  
50  
51 884 142. Ford H, Dallas CE, Harris C. Examining Roles Pharmacists Assume in Disasters: A Content  
52  
53 885 Analytic Approach. *Disaster Medicine and Public Health Preparedness* 2013;7(6):563-72. doi:  
54  
55 886 10.1017/dmp.2013.99  
56  
57  
58  
59  
60

- 1  
2  
3 887 143. Schwerzmann J, Graitcer SB, Jester B, et al. Evaluating the Impact of Pharmacies on Pandemic  
4  
5 888 Influenza Vaccine Administration. *Disaster Medicine and Public Health Preparedness*  
6  
7 889 2017;11(5):587-93. doi: 10.1017/dmp.2017.1  
8  
9  
10 890 144. Donald M, King-Shier K, Tsuyuki RT, et al. Patient, family physician and community pharmacist  
11  
12 891 perspectives on expanded pharmacy scope of practice: a qualitative study. *CMAJ Open*  
13  
14 892 2017;5(1):E205-E12. doi: 10.9778/cmajo.20160135  
15  
16 893 145. Mossialos E, Courtin E, Naci H, et al. From “retailers” to health care providers: Transforming the  
17  
18 894 role of community pharmacists in chronic disease management. *Health Policy*  
19  
20 895 2015;119(5):628-39. doi: 10.1016/j.healthpol.2015.02.007  
21  
22  
23 896 146. Mossialos E, Naci H, Courtin E. Expanding the role of community pharmacists: Policymaking in  
24  
25 897 the absence of policy-relevant evidence? *Health Policy* 2013;111(2):135-48. doi:  
26  
27 898 10.1016/j.healthpol.2013.04.003  
28  
29  
30 899 147. OECD (2020), Beyond Containment: Health systems responses to COVID-19 in the OECD.  
31  
32 900 Organisation for Economic Co-operation and Development, Paris. [Available from:  
33  
34 901 [https://read.oecd-ilibrary.org/view/?ref=119\\_119689-](https://read.oecd-ilibrary.org/view/?ref=119_119689-ud5comtf84&title=Beyond_Containment:Health_systems_responses_to_COVID-19_in_the_OECD)  
35  
36 902 [ud5comtf84&title=Beyond\\_Containment:Health\\_systems\\_responses\\_to\\_COVID-](https://read.oecd-ilibrary.org/view/?ref=119_119689-ud5comtf84&title=Beyond_Containment:Health_systems_responses_to_COVID-19_in_the_OECD)  
37  
38 903 [19\\_in\\_the\\_OECD](https://read.oecd-ilibrary.org/view/?ref=119_119689-ud5comtf84&title=Beyond_Containment:Health_systems_responses_to_COVID-19_in_the_OECD). Accessed 13/4/21]  
39  
40  
41 904 148. Ilardo ML, Speciale A. The Community Pharmacist: Perceived Barriers and Patient-Centered  
42  
43 905 Care Communication. *International Journal of Environmental Research and Public Health*  
44  
45 906 2020;17(2):536. doi: 10.3390/ijerph17020536  
46  
47  
48 907 149. Daly CJ, Quinn B, Mak A, et al. Community Pharmacists’ Perceptions of Patient Care Services  
49  
50 908 within an Enhanced Service Network. *Pharmacy* 2020;8(3):172. doi:  
51  
52 909 10.3390/pharmacy8030172  
53  
54 910 150. Ecartot F, Crepaldi G, Juvin P, et al. Pharmacy-based interventions to increase vaccine uptake:  
55  
56 911 report of a multidisciplinary stakeholders meeting. *BMC Public Health* 2019;19(1) doi:  
57  
58 912 10.1186/s12889-019-8044-y  
59  
60

- 1  
2  
3 913 151. Moullin JC, Sabater-Hernández D, Fernandez-Llimos F, et al. Defining professional pharmacy  
4  
5 914 services in community pharmacy. *Research in Social and Administrative Pharmacy*  
6  
7 915 2013;9(6):989-95. doi: 10.1016/j.sapharm.2013.02.005  
8  
9  
10 916 152. NHS England. General practice forward view: NHS England, 2016. [Available from:  
11  
12 917 <https://www.england.nhs.uk/gp/gpfv>. Accessed 12/12/20]  
13  
14 918 153. Milosavljevic A, Aspden T, Harrison J. Community pharmacist-led interventions and their impact  
15  
16 919 on patients' medication adherence and other health outcomes: a systematic review. *The*  
17  
18 920 *International journal of pharmacy practice* 2018;26(5):387-97. doi: 10.1111/ijpp.12462  
19  
20  
21 921 [published Online First: 2018/06/22]  
22  
23 922 154. Justwan F, Baumgaertner B, Carlisle JE, et al. The effect of trust and proximity on vaccine  
24  
25 923 propensity. *PLOS One* 2019;14(8):e0220658. doi: 10.1371/journal.pone.0220658  
26  
27  
28 924 155. Pharmaceutical Services Negotiating Committee. Preparations for a potential COVID-19  
29  
30 925 vaccination programme.: Pharmaceutical Services Negotiating Committee; 2020 [Available  
31  
32 926 from: [https://psnc.org.uk/our-news/preparations-for-a-potential-covid-19-vaccination-](https://psnc.org.uk/our-news/preparations-for-a-potential-covid-19-vaccination-programme)  
33  
34 927 [programme](https://psnc.org.uk/our-news/preparations-for-a-potential-covid-19-vaccination-programme). Accessed 08/11/2020]  
35  
36  
37  
38  
39  
40  
41  
42  
43  
44  
45  
46  
47  
48  
49  
50  
51  
52  
53  
54  
55  
56  
57  
58  
59  
60

## Appendix 1 - OVID MEDLINE – Search Strategy

1  
2  
3  
4  
5  
6  
7  
8  
9  
10  
11  
12  
13  
14  
15  
16  
17  
18  
19  
20  
21  
22  
23  
24  
25  
26  
27  
28  
29  
30  
31  
32  
33  
34  
35  
36  
37  
38  
39  
40  
41  
42  
43  
44  
45  
46  
47  
48  
49  
50  
51  
52  
53  
54  
55  
56  
57  
58  
59  
60

1. exp Coronavirus/ or exp Coronavirus Infections/ or (coronavirus\* or "2019-nCoV" or "2019 ncov" or nCov or "Covid 19" or Covid19 or "SARS CoV 2" or novel coronavirus or novel corona virus or covid\* or "coronavirus 2" or coronavirus infection\* or coronavirus disease or corona virus disease or new coronavirus or new corona virus or new coronaviruses or novel coronaviruses or wuhan).mp. [mp=title, abstract, original title, name of substance word, subject heading word, floating sub-heading word, keyword heading word, organism supplementary concept word, protocol supplementary concept word, rare disease supplementary concept word, unique identifier, synonyms]

2. (Community pharmacy or community pharmacies or community pharmacist or community pharmacists or retail pharmacy or retail pharmacist or retail pharmacists or dispensing chemist or dispensing chemists or (((Pharmacist or pharmacy) and (community or primary care)) or dispensary or apothecary or druggist)).mp. [mp=title, abstract, original title, name of substance word, subject heading word, floating sub-heading word, keyword heading word, organism supplementary concept word, protocol supplementary concept word, rare disease supplementary concept word, unique identifier, synonyms]

3. 1 and 2

*NB. No Date or Language Limits were applied.*



## Appendix 2 - Literature inclusion criteria

Published after January 2003 AND  
COVID-19 or other pandemic or other infectious diseases  
    OR vaccination programmes  
    OR expanded/extended roles  
AND Community Pharmacy  
AND High- or middle-income country

For peer review only

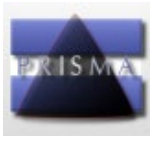

## PRISMA 2009 Flow Diagram

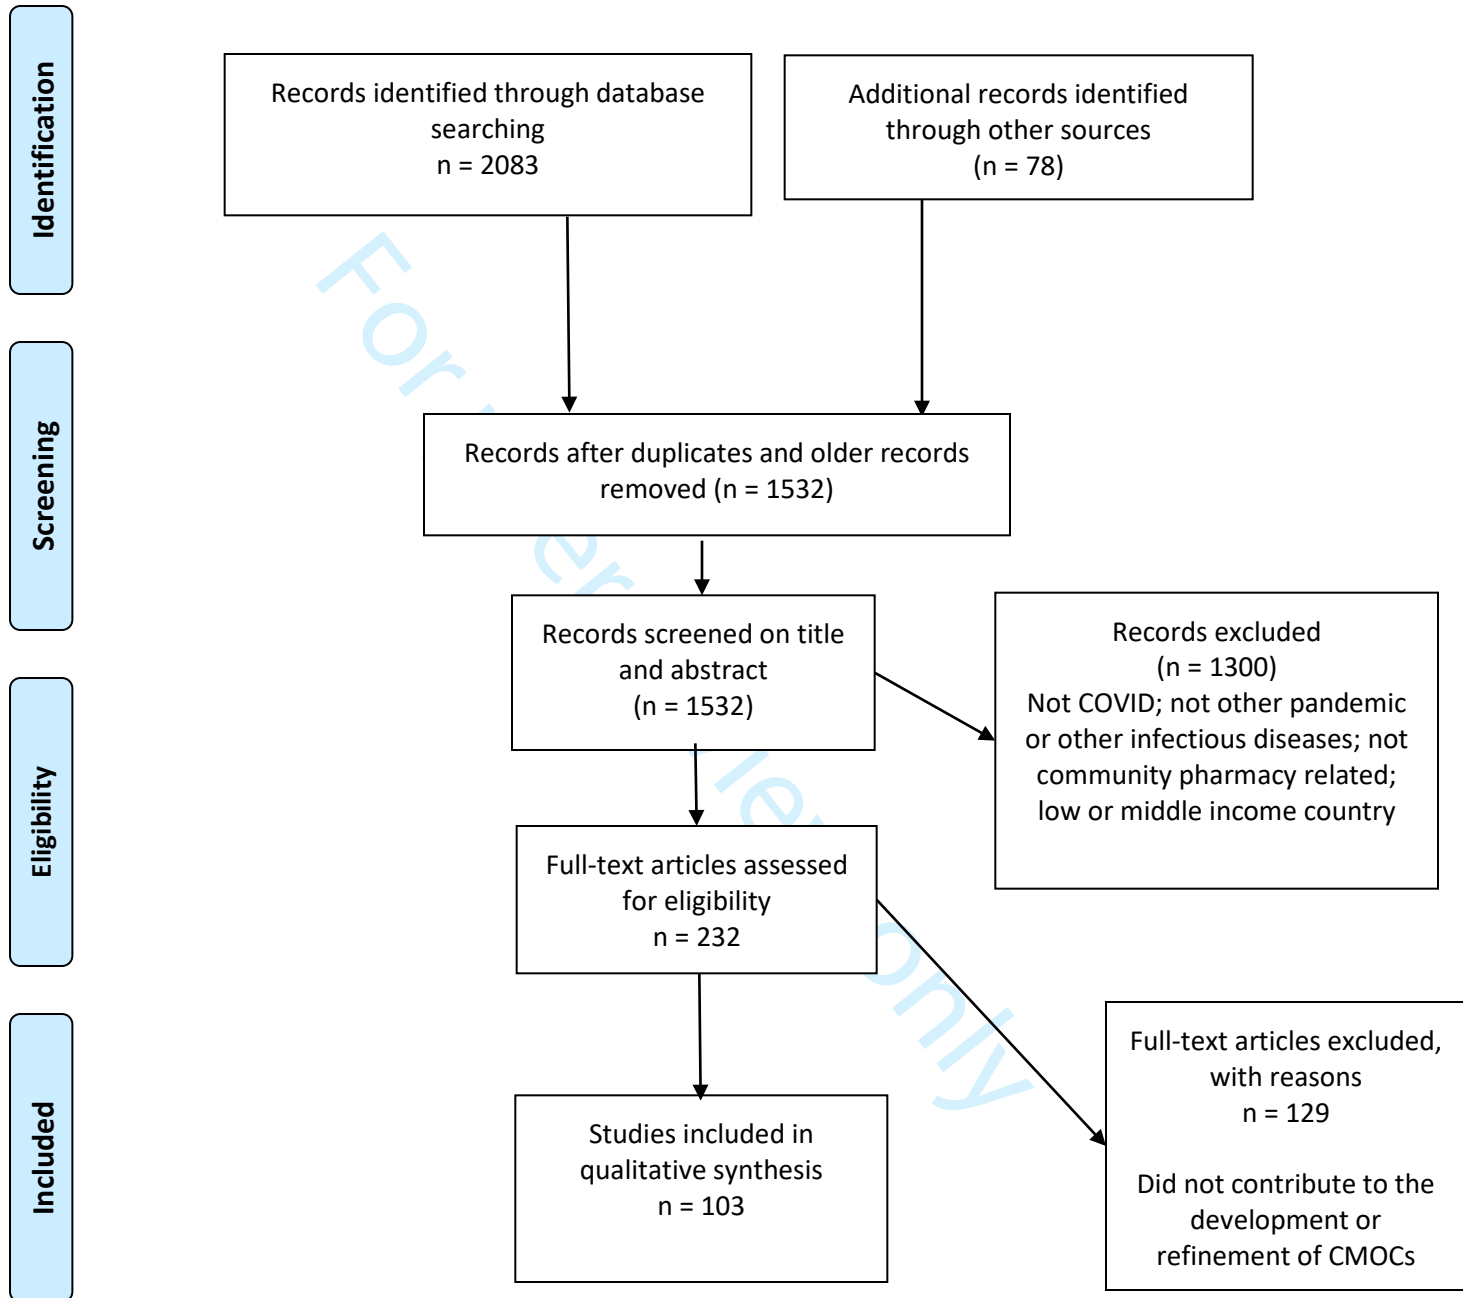

From: Moher D, Liberati A, Tetzlaff J, Altman DG, The PRISMA Group (2009). Preferred Reporting Items for Systematic Reviews and Meta-Analyses: The PRISMA Statement. PLoS Med 6(7): e1000097. doi:10.1371/journal.pmed1000097

For more information, visit [www.prisma-statement.org](http://www.prisma-statement.org).

For peer review only - <http://bmjopen.bmj.com/site/about/guidelines.xhtml>

Appendix 4 - A simplified diagram of the programme theory of a COVID-19 vaccination programme provided by community pharmacies



Supplement: bmjopen-2021-050043.draft_revisions.pdf [file bmjopen-2021-050043.draft_revisions.pdf]
