# Supplementary material for: Rapid realist review of the role of community pharmacy in the public health response to COVID-19
Source: PubMed Central journal article supplement (PMC8210681; doi:10.1136/bmjopen-2021-050043), 2021-06-16
Supplement: bmjopen-2021-050043supp002.pdf [file bmjopen-2021-050043supp002.pdf]

## Appendix 2 - Literature inclusion criteria

Published after January 2003 AND  
COVID-19 or other pandemic or other infectious diseases  
    OR vaccination programmes  
    OR expanded/extended roles  
AND Community Pharmacy  
AND High- or middle-income country
