# Supplementary material for: Rapid realist review of the role of community pharmacy in the public health response to COVID-19
Source: PubMed Central journal article supplement (PMC8210681; doi:10.1136/bmjopen-2021-050043), 2021-06-16
Supplement: bmjopen-2021-050043supp003.pdf [file bmjopen-2021-050043supp003.pdf]

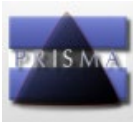

## PRISMA 2009 Flow Diagram

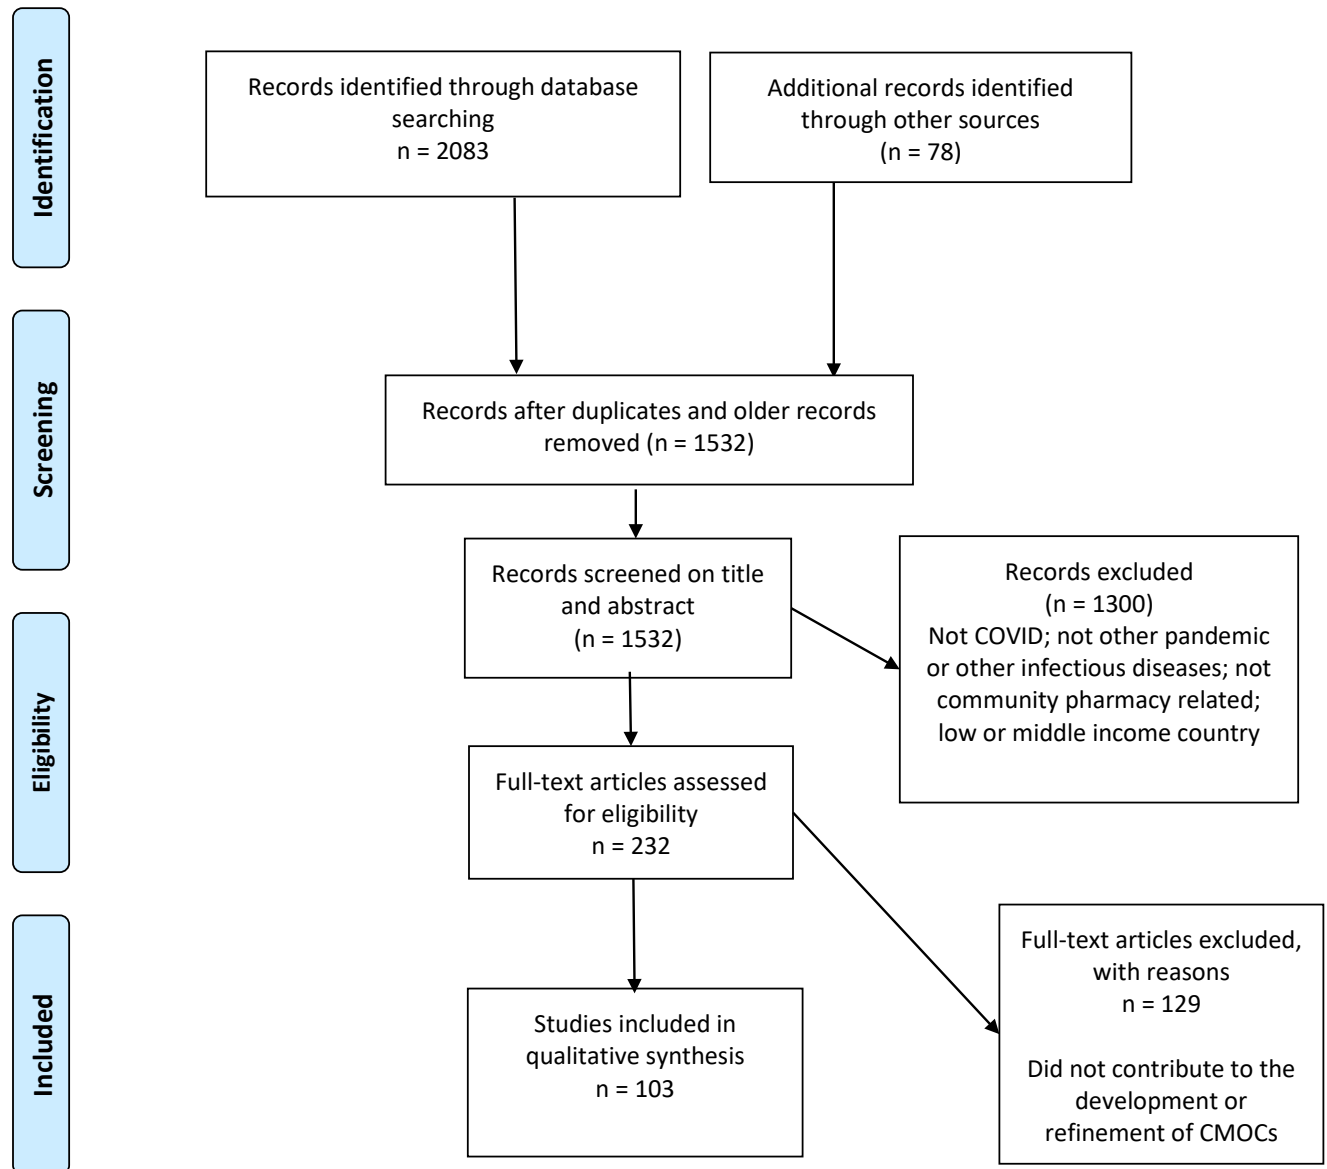

From: Moher D, Liberati A, Tetzlaff J, Altman DG, The PRISMA Group (2009). Preferred Reporting Items for Systematic Reviews and Meta-Analyses: The PRISMA Statement. *PLoS Med* 6(7): e1000097. doi:10.1371/journal.pmed1000097

For more information, visit [www.prisma-statement.org](http://www.prisma-statement.org).
