# Supplementary material for: Rapid realist review of the role of community pharmacy in the public health response to COVID-19
Source: PubMed Central journal article supplement (PMC8210681; doi:10.1136/bmjopen-2021-050043), 2021-06-16

Appendix 4 - A simplified diagram of the programme theory of a COVID-19 vaccination programme provided by community pharmacies

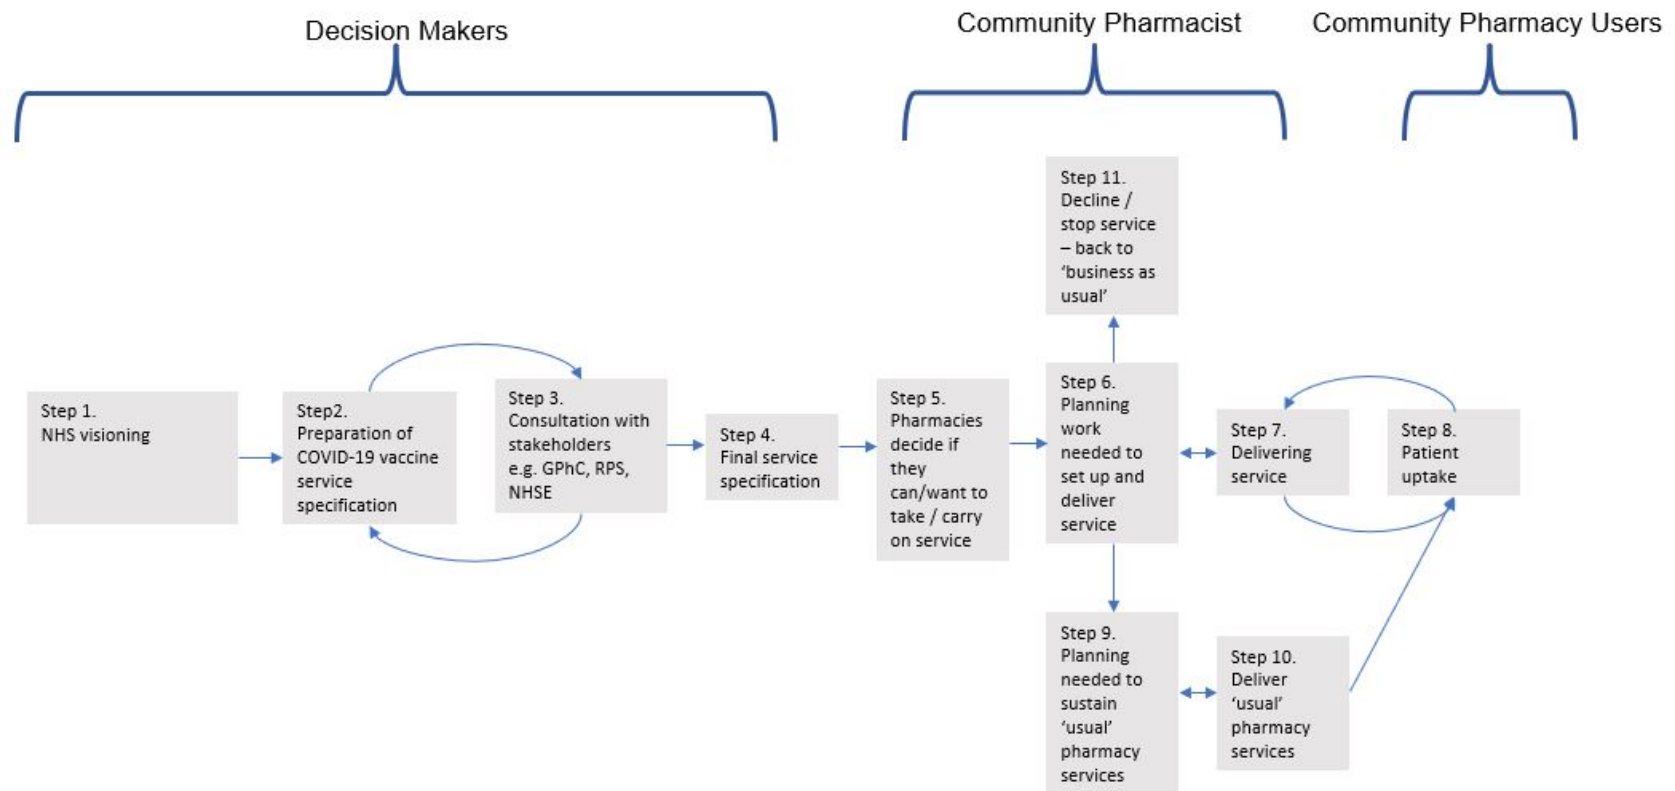

Supplement: bmjopen-2021-050043supp004.pdf [file bmjopen-2021-050043supp004.pdf]
